# Supplementary material for: A multi-component synthetic route for 2-pyrazolines via acceptorless dehydrogenation of alcohols using homogeneous Ni( ii ) catalysts
Source: Royal Society of Chemistry journal article supplement (doi:10.1039/d4ob01352b), 2024-01-01
Supplement: d4ob01352b1.pdf [file d4ob01352b1.pdf]

# A multi-component synthetic route for 2-pyrazolines via acceptorless dehydrogenation of alcohols using homogeneous Ni(II) catalysts

Prashant Kukreti,<sup>a#</sup> Rahul Chauhan,<sup>a#</sup> Abhishek Panwar,<sup>b</sup> and Kaushik Ghosh<sup>a\*</sup>

<sup>a</sup>Department of Chemistry, Indian Institute of Technology Roorkee, Roorkee-247667, India.

<sup>b</sup>Department of Chemistry National Institute of Technology Manipur, Langol-795004, Imphal West, Manipur, India

## Table of contents:

| S.No      | Details                                                                                                                                                                                                                                                                                                                                                                                  |
|-----------|------------------------------------------------------------------------------------------------------------------------------------------------------------------------------------------------------------------------------------------------------------------------------------------------------------------------------------------------------------------------------------------|
| <b>1</b>  | <b>Experimental</b><br>1.1 Materials used<br>1.2 X-ray crystallography<br>1.3 Computational methods                                                                                                                                                                                                                                                                                      |
| <b>2</b>  | <b>2.1</b> Biologically active molecules with pyrazoline moiety<br><b>2.2</b> Previous reports on transition metal catalyzed MCS of pyrazole synthesis and previous approaches for pyrazoline synthesis                                                                                                                                                                                  |
| <b>3</b>  | <b>Synthesis of ligand and complexes</b><br>3.1 Synthesis of ligand L1<br>3.2 Synthesis of ligand L2<br>3.3 Syntheses of (C1 and C2) complexes [Ni(II)(L1)Cl <sub>2</sub> ] and [Ni(II)(L2)Cl <sub>2</sub> ]                                                                                                                                                                             |
| <b>4</b>  | <b>Characterization of ligand and complexes</b><br>4.1 Characterization of ligand L1 ( <sup>1</sup> H NMR, <sup>13</sup> C NMR, IR, UV, HRMS)<br>4.2 Characterization of ligand L2 ( <sup>1</sup> H NMR, <sup>13</sup> C NMR, IR, UV, HRMS)<br>4.3 Characterization of complexes C1 and C2 (IR, UV, HRMS)                                                                                |
| <b>5</b>  | <b>Single crystal XRD characterization</b><br>5.1 Single crystal structure of [Ni(II)(L1)Cl <sub>2</sub> ]<br>5.2 Single crystal structure of [Ni(II)(L2)Cl <sub>2</sub> ]<br>5.3 DFT calculations and HOMO, LUMO energy representation of C1 and C2                                                                                                                                     |
| <b>6</b>  | <b>Optimization of reaction conditions</b><br>6.1 Optimization of base<br>6.2 Optimization of base equivalent<br>6.3 Optimization of solvent<br>6.4 Optimization of catalyst mol%<br>6.5 Optimization of time<br>6.6 Optimization of temperature<br>6.7 Optimization of substrates<br>6.8 General procedure for MCS of pyrazolines                                                       |
| <b>7</b>  | <b>Characterization of intermediates and side product (H<sub>2</sub>) by GC-MS</b><br>7.1 Detection of H <sub>2</sub> via styrene reduction in presence of 10% Pd-C<br>7.2 Detection of in-situ formed alpha-beta unsaturated carbonyl compound<br>7.3 Detection of Ni-H and Ni-alkoxy intermediates during catalysis<br>7.4 Synthesis of (E)-1-(4-methoxybenzylidene)-2-phenylhydrazine |
| <b>8</b>  | <b><sup>1</sup>H, <sup>13</sup>C and <sup>19</sup>F characterization of products</b>                                                                                                                                                                                                                                                                                                     |
| <b>9</b>  | <b><sup>1</sup>H, <sup>13</sup>C and <sup>19</sup>F Spectrum of products</b>                                                                                                                                                                                                                                                                                                             |
| <b>10</b> | <b>Coordinates for optimized structures</b>                                                                                                                                                                                                                                                                                                                                              |

## 1. Experimental

### 1.1 Materials used

All the chemicals and solvents were purchased from commercially available sources such as Aldrich, Merck, TCI, SRL, and ACROS organics and used as received. Analytical grade reagents and solvents were used for whole activities and spectroscopic studies. 2,6-Bis(1-phenylhydrazinyl) pyridine was synthesized according to literature.<sup>1</sup> UV-Vis. Spectra were recorded using a UV-Vis Spectrophotometer (UV-2600 from Shimadzu). IR spectra were recorded on an ALPHA II compact FT-IR spectrometer with the use of KBr pellets (16 scans in  $\text{cm}^{-1}$ ). NMR spectra were recorded using Bruker Avance III 500 MHz (AV 500) and Jeol 500MHz spectrometers in deuterated solvents. Chemical shift values in NMR are recorded in  $\delta$  (ppm) values against TMS as internal standard. NMR coupling constants (J) are represented in hertz (Hz) values. Multiplets in the chemical shift are given as s (singlet), d (doublet), t (triplet), q (quartet), dd (doublet of doublets), ddd (doublet of doublet of doublets), dt (doublet of triples), td (triplet of doublets).

### 1.2 X-ray crystallography

The X-ray data collection and processing of complex 1 and complex 2 were performed on a Bruker Kappa (D8 QUEST) Apex-IV CMOS diffractometer by using graphite monochromated Mo-K $\alpha$  radiation ( $\lambda = 0.71070 \text{ \AA}$ ) at 119 K and 105 K, respectively. The crystal structures were solved by SIR-92 GUI control methods. The Olex<sup>2</sup> software was used to solve the crystal structures and refine them using ShelXT and ShelXL, respectively.<sup>3</sup> The bond lengths and bond angles were computed with the help of MERCURY software. Additionally, ORTEP<sup>4</sup> images was generated using the same MERCURY program. The hydrogen atoms were placed in geometrically determined positions and refined using the riding model. The accompanying supplementary information (SI) files contains pertinent crystallographic parameters.

### 1.3 Computational methods

Density functional theory (DFT) calculations were performed using Gaussian 09W software. The input files for Gaussian 09 were prepared with Gauss View 5.0.8.<sup>30</sup> The spin-unrestricted B3LYP functional was employed alongside two basis sets: the LanL2DZ basis set for Ni and the 6-31+G(d,p) basis set for all other elements. Frequency calculations for the optimized structures were conducted at room temperature (298.15 K). All computations were carried out in toluene using the Integral Equation Formalism Polarizable Continuum Model (IEFPCM) within the self-consistent reaction field (SCRF) approach. Free energy evaluations were also performed at room temperature. The free energy change ( $\Delta G$ ) includes contributions from electronic energy ( $\Delta E$ ), zero-point vibrational energy ( $\Delta Z_0$ ), thermal enthalpy ( $\Delta E_{\text{thermal}}$ ), and entropy ( $-\Delta S$ ).

### 2.1 Biologically active molecules with pyrazoline moiety

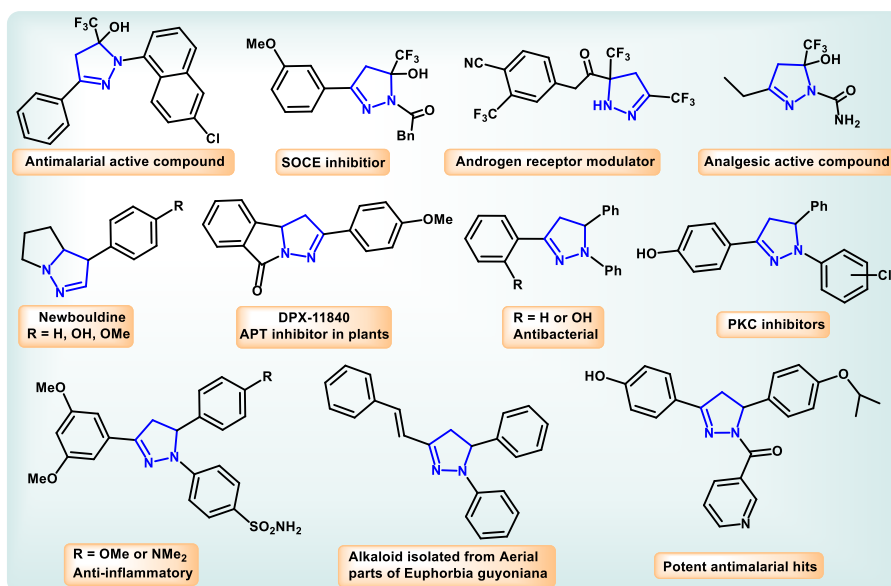

## 2.2 Previous reports on transition metal catalyzed MCS of pyrazole synthesis and previous approaches for pyrazoline synthesis

Over the last few decades, many methods have been developed for the synthesis of pyrazoles and 2-pyrazolines in which the most common was the cyclization of hydrazine with various electrophiles, including 1,3-dicarbonyl compounds,  $\alpha,\beta$ -unsaturated carbonyl compounds and dihalides etc.<sup>5–10</sup> Some of previously utilized methods for synthesis of pyrazoline are shown in Figure(2).<sup>11–29</sup> [13–31] Although a number of difficulties are still existed in these methods such as poor selectivity, toxicity, expensive chemicals, pre-functionalization of reactants, multi-step reactions etc.

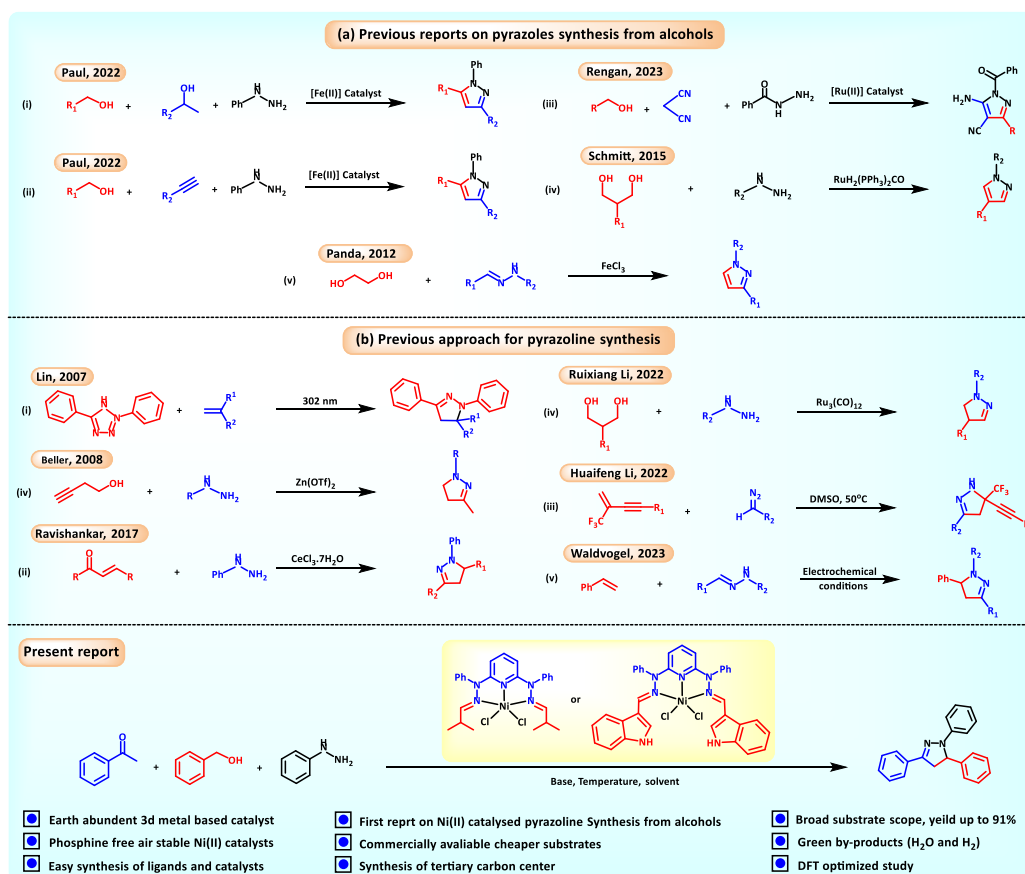

### 3. Synthesis

#### 3.1 Synthesis of L1 = 2,6-bis(2-((E)-2-methylpropylidene)-1-phenylhydrazineyl)pyridine

To a methanolic solution of 2,6-bis(1-phenylhydrazineyl)pyridine (4 mmol, 1164mg) in 15ml methanol isobuturaldehyde (8 mmol, 576mg) was added dropwise with constant stirring. Reaction mixture was stirred for next 1 hour a white solid precipitate out. Precipitate was filtered, gently wash with cold methanol and dried. Yield - 1276 mg (80%). Selected IR data (KBr,  $\nu_{\max}/\text{cm}^{-1}$ ): 2959 ( $\nu_{\text{sp}^3 \text{ C-H}}$ ), 1585 ( $\nu_{\text{C=N}}$ , imine), 1464 ( $\nu_{\text{C=C}}$ ). UV-visible [DMF,  $\lambda_{\max}/\text{nm}$  ( $\epsilon/\text{M}^{-1}\text{cm}^{-1}$ ): 321.8 (14003.2).  $^1\text{H}$  NMR (500 MHz,  $\text{CDCl}_3$ )  $\delta$  7.54 (t,  $J = 8.0$  Hz, 1H), 7.20 (t,  $J = 7.3$  Hz, 4H), 7.15 (t,  $J = 7.3$  Hz, 2H), 6.96 (d,  $J = 8.0$  Hz, 2H), 6.86 (d,  $J = 7.2$  Hz, 4H), 6.56 (d,  $J = 4.9$  Hz, 2H), 2.54 – 2.47 (m, 2H), 1.05 (d,  $J = 6.8$  Hz, 12H).  $^{13}\text{C}$  NMR (126 MHz,  $\text{CDCl}_3$ )  $\delta$  156.70, 146.03, 139.67, 138.78, 129.44, 129.11, 126.57, 99.61, 31.67, 20.13.

#### 3.2 Synthesis of L2 = 2,6-bis(2-((E)-(1H-indol-3-yl)methylene)-1-phenylhydrazineyl)pyridine

To a methanolic solution of 2,6-bis(1-phenylhydrazineyl)pyridine (2 mmol, 582mg) in 15ml methanol a solution of indole-3-carboxaldehyde (4 mmol, 580mg) in 5ml methanol was added dropwise with constant stirring. Reaction mixture was stirred for next 4 hour a paleyellow colour solid precipitate out. Precipitate was filtered, gently wash with cold methanol and dried. Yield - 850 mg (78%). Selected IR data (KBr,  $\nu_{\max}/\text{cm}^{-1}$ ): C2 = 1574 (C=N imine), 1436. UV-visible [DMF,  $\lambda_{\max}/\text{nm}$  ( $\epsilon/\text{M}^{-1}\text{cm}^{-1}$ ): 440.18(1,881.50), 345.53(72,801.75), 281.56(32,359.37), 232.28(53,262.98).  $^1\text{H}$  NMR (500 MHz, )  $\delta$  11.35 (d,  $J = 1.9$  Hz, 2H), 8.29 (dd,  $J = 6.1, 2.4$  Hz, 2H), 7.79 (t,  $J = 8.0$  Hz, 1H), 7.52 (d,  $J = 3.1$  Hz, 4H), 7.38 (dd,  $J = 6.2, 2.4$  Hz, 2H), 7.25 (dd,  $J = 10.4, 4.7$  Hz, 4H), 7.21 – 7.15 (m, 6H), 7.10 (d,  $J = 8.0$  Hz, 2H), 6.96 – 6.92 (m, 4H).  $^{13}\text{C}$  NMR (126 MHz, DMSO)  $\delta$  156.60, 139.97, 139.51, 137.51, 136.52, 129.81, 129.66, 129.18, 127.04, 124.41, 122.89, 122.01, 120.80, 112.85, 112.27, 100.20.

#### 3.3 Syntheses of (C1 and C2) complexes [Ni(II)(L1)Cl<sub>2</sub>] and [Ni(II)(L2)Cl<sub>2</sub>]

In a stirring solution of Ligand L1 and L2 (0.5 mmol in 10ml DCM) a solution of NiCl<sub>2</sub>.4H<sub>2</sub>O (0.5 mmol in 2 ml MeOH) was added drop wise to it. The instant colour change was observed from colourless to red orange in case of C1 and pale yellow to brown in case of C2. The reaction mixtures were stirred for next 8 hours at room temperature after that solvent was reduced under vacuum and complexes recrystallized by DCM-MeOH. Yield: C1 = 230 mg (87%), C2= 270 mg (80%). Solubility – DCM, MeOH, DMSO, DMF. Selected IR data (KBr,  $\nu_{\max}/\text{cm}^{-1}$ ): for C1 = 2963 ( $\text{sp}^3 \text{ C-H}$ ), 1576 (C=N imine), 1453 and for C2 = 1571 (C=N imine), 1458. UV-visible [DMF,  $\lambda_{\max}/\text{nm}$  ( $\epsilon/\text{M}^{-1}\text{cm}^{-1}$ ): for C1 = 347.63 (42,933.36), 280.08 (44,440.26) and for C2 = 402.31 (20,972.15), 349.62 (34,188.97), 272.08 (26,371.42), 221.17 (64,067.26)

### 4. Characterization

#### 4.1 Characterization of Ligand L1 (BmpPhe)

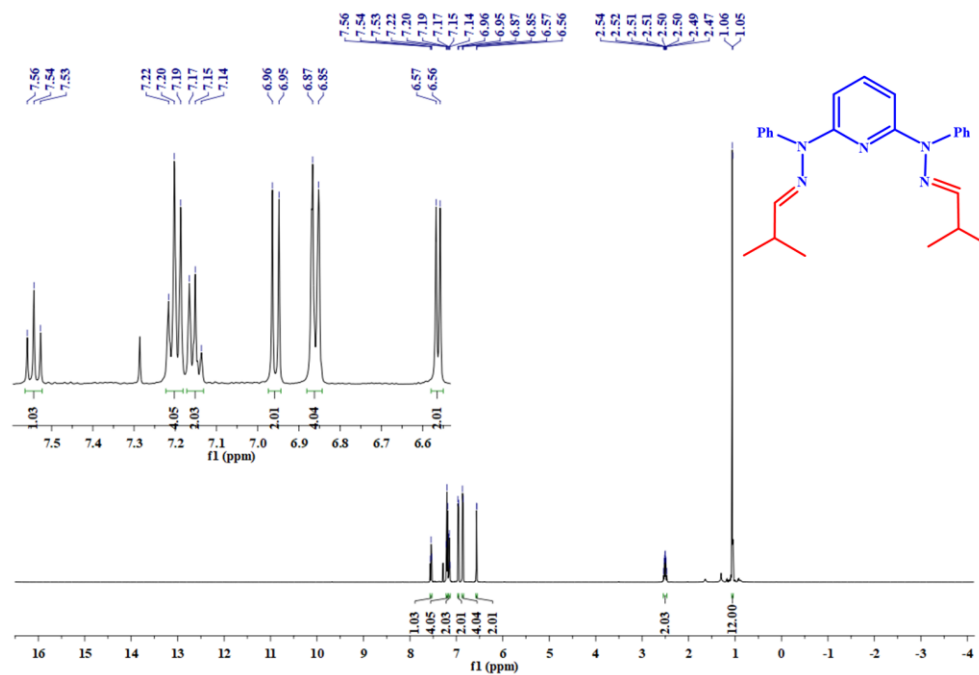

Figure S1- <sup>1</sup>H NMR spectrum of L1

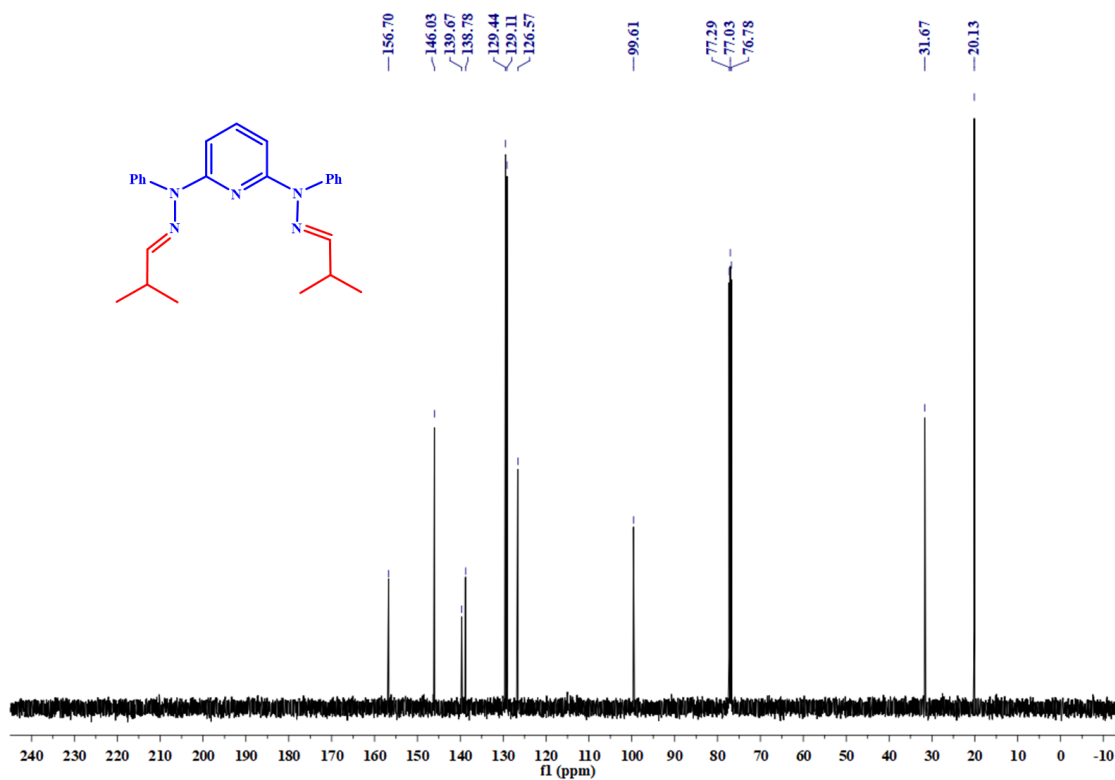

Figure S2 - <sup>13</sup>C NMR spectrum of L1

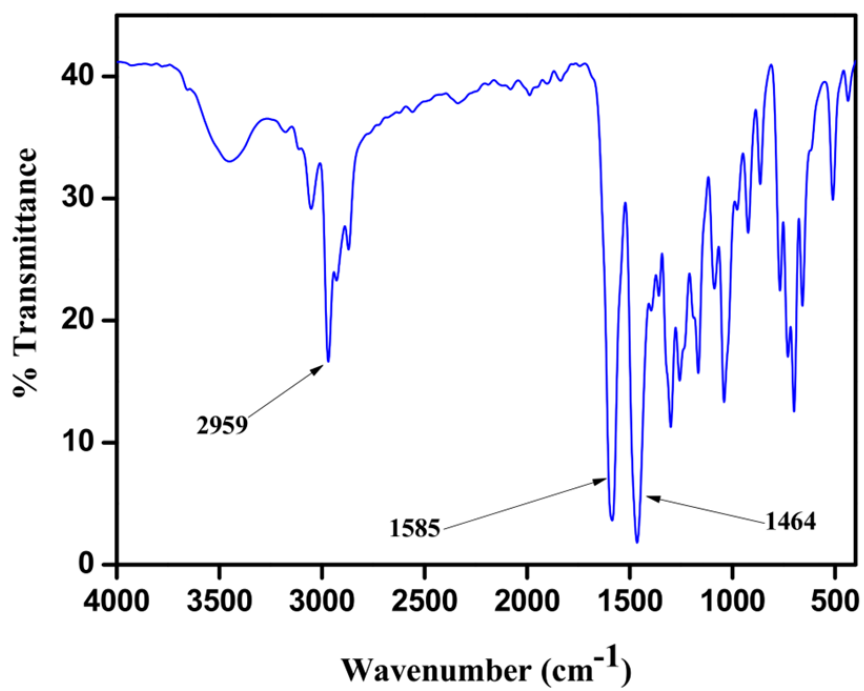

Figure S3 - IR spectrum of L1

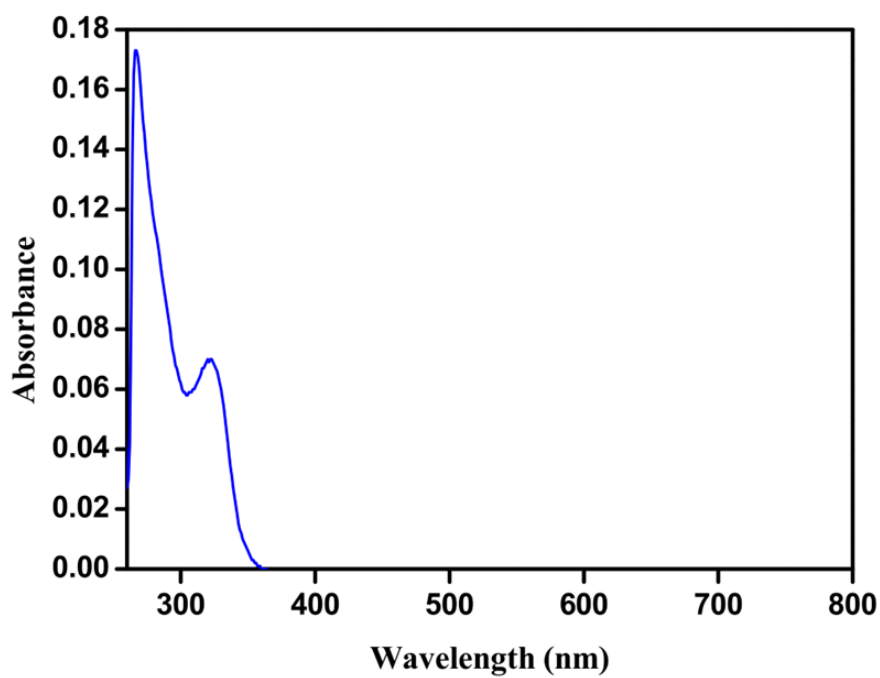

Figure S4 -UV visible spectrum of L1

# User Spectrum Plot Report

|                |                                              |            |            |                   |                                     |
|----------------|----------------------------------------------|------------|------------|-------------------|-------------------------------------|
| Name           | KG_Prashant_300424_ Rack Pos.<br>PK-581      | Instrument | LCQTOF     | Operator          | SYSTEM (SYSTEM)                     |
| Inj. Vol. (ul) | 2                                            | Plate Pos. | IRM Status | Success           |                                     |
| Data File      | KG_Prashant_300424_ Method (Acq)<br>PK-581.d | POSITIV.m  | Comment    | Acq. Time (Local) | 4/30/2024 3:01:01 PM<br>(UTC+05:30) |

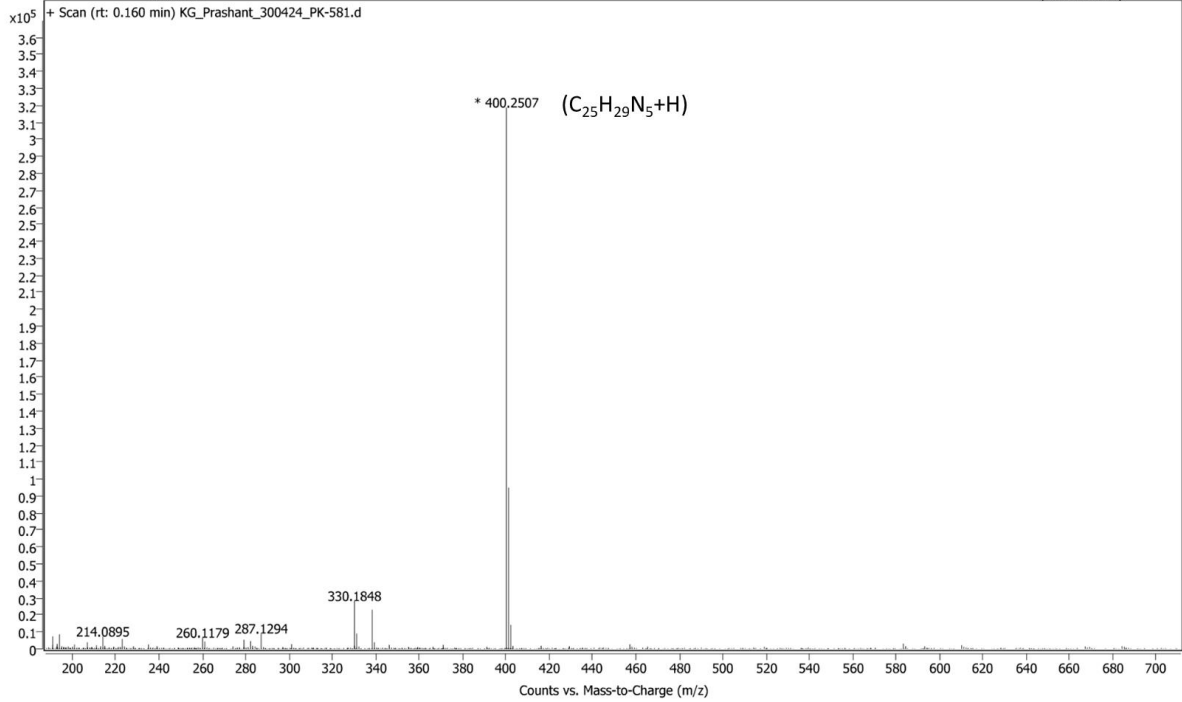

Figure S5 -HRMS spectrum of L1

## 4.2 Characterization of L2 (BimPhe)

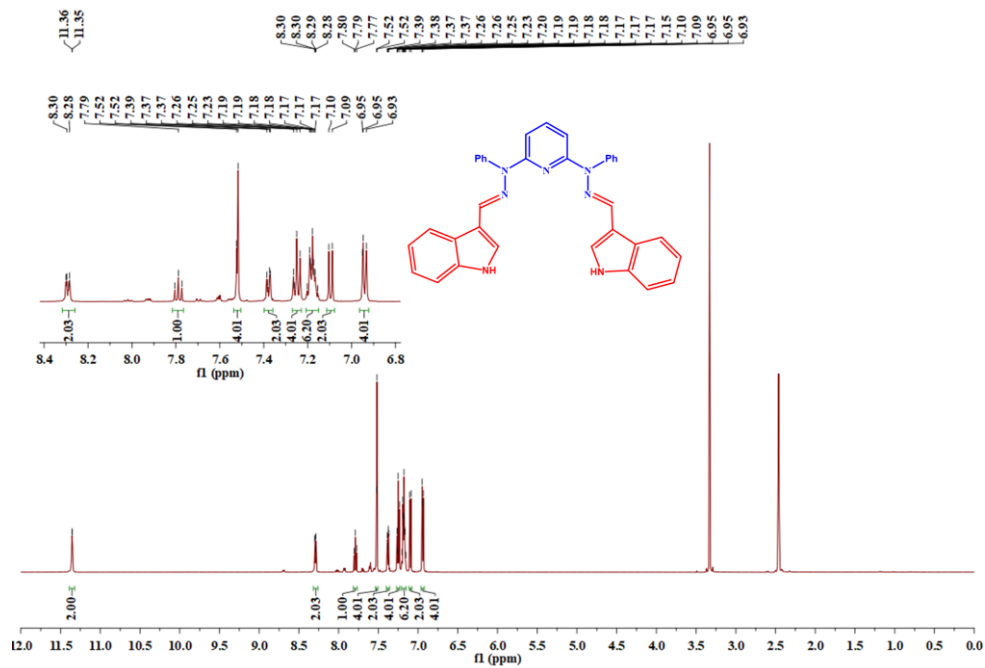

Figure S6 - <sup>1</sup>H NMR spectrum of L2

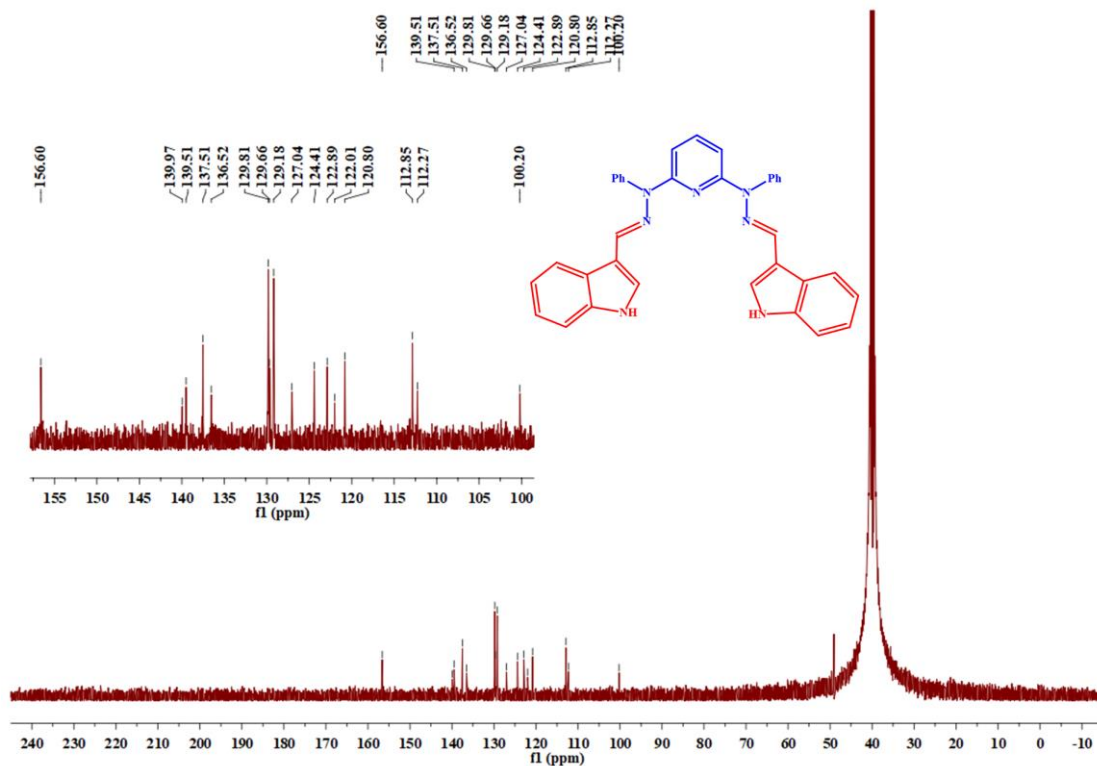

Figure S7 - <sup>13</sup>C NMR spectrum of L2

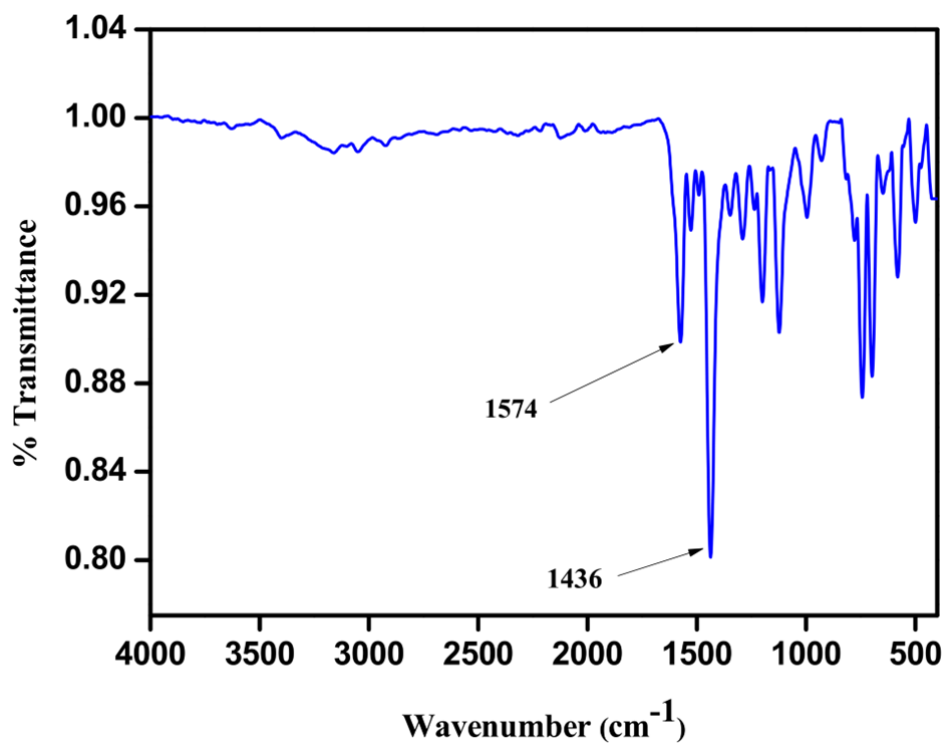

Figure S8 - IR spectrum of L2



## User Spectrum Plot Report

|                |                                             |            |            |                   |                                     |
|----------------|---------------------------------------------|------------|------------|-------------------|-------------------------------------|
| Name           | KG_Prashant_300424_ Rack Pos.<br>RC-47      | Instrument | LCQTOF     | Operator          | SYSTEM (SYSTEM)                     |
| Inj. Vol. (ul) | 2                                           | Plate Pos. | IRM Status | Success           |                                     |
| Data File      | KG_Prashant_300424_ Method (Acq)<br>RC-47.d | POSITIVE.m | Comment    | Acq. Time (Local) | 4/30/2024 3:06:33 PM<br>(UTC+05:30) |

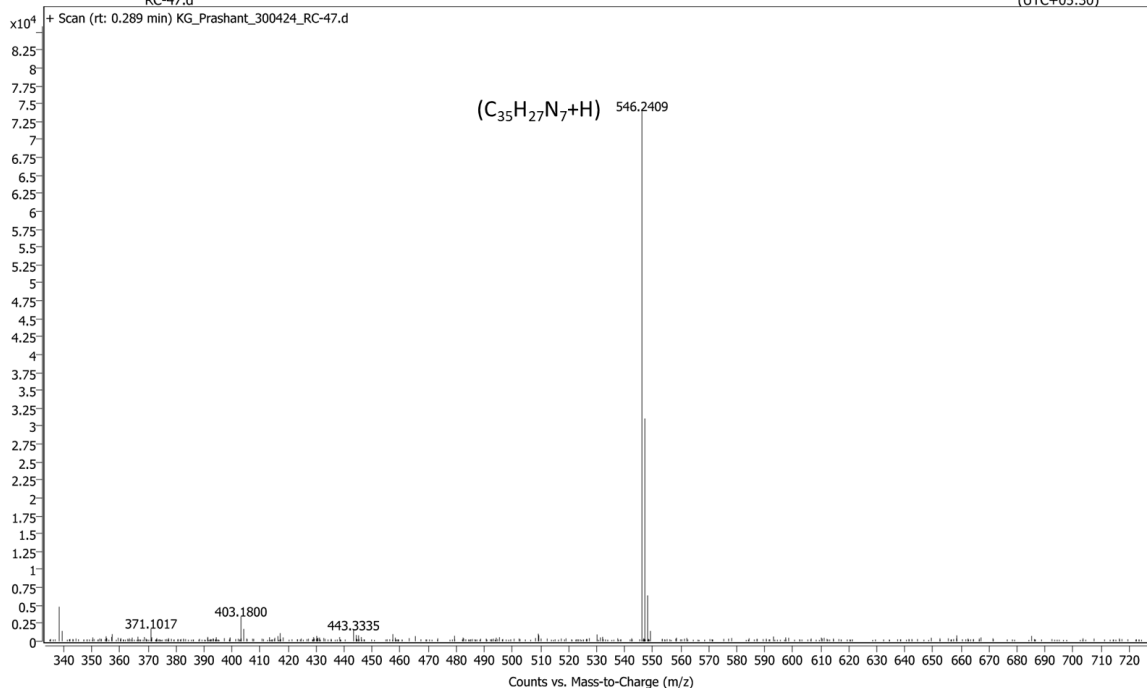

Figure S9 - HRMS spectrum of L2

### 4.3 Characterization of complexes C1 and C2

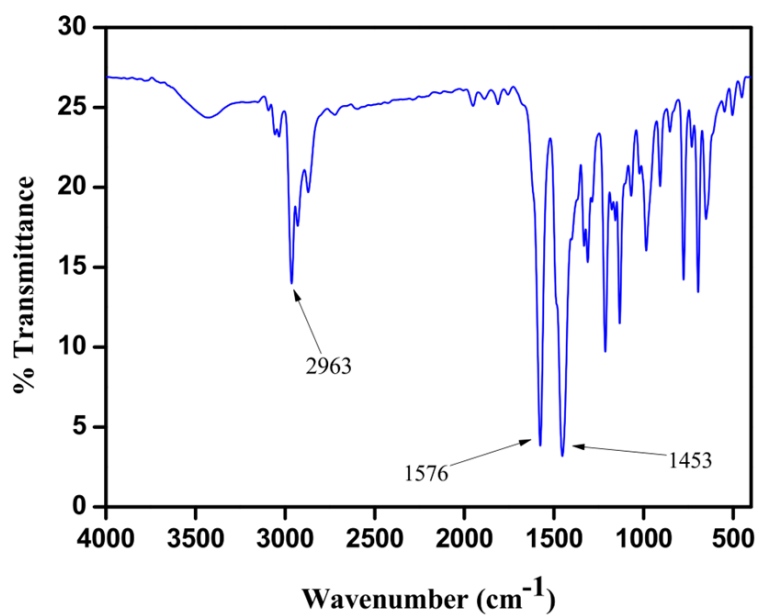

Figure S10 - IR spectrum of C1 = [Ni(II)(L1)Cl<sub>2</sub>]

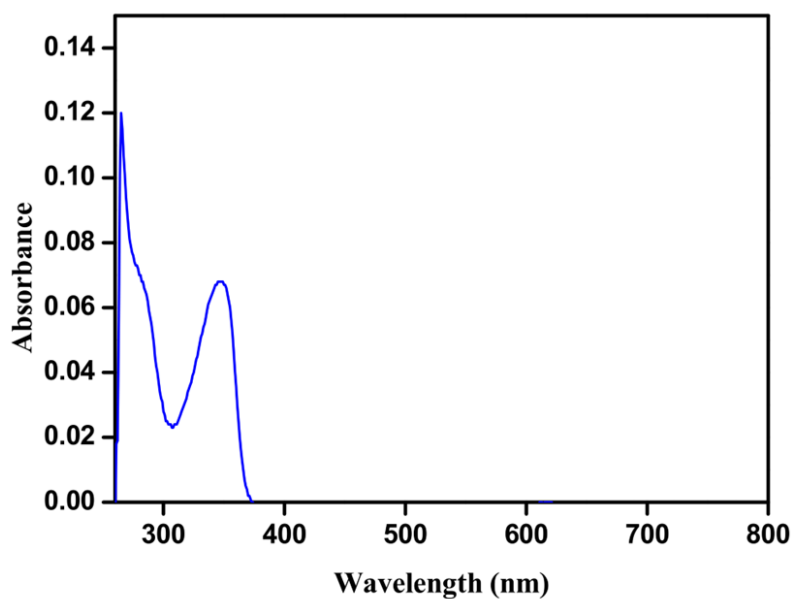

Figure S11 - UV visible spectrum of C1 = [Ni(II)(L1)Cl<sub>2</sub>]

User Spectrum Plot Report

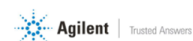

|                |                                              |            |         |                   |                      |
|----------------|----------------------------------------------|------------|---------|-------------------|----------------------|
| Name           | KG_Prashant_300424_ Rack Pos.<br>PK-584      | Instrument | LCQTOF  | Operator          | SYSTEM (SYSTEM)      |
| Inj. Vol. (ul) | 2                                            | IRM Status | Success | Acq. Time (Local) | 4/30/2024 3:03:50 PM |
| Data File      | KG_Prashant_300424_ Method (Acq)<br>PK-584.d | Comment    |         | (UTC+05:30)       |                      |

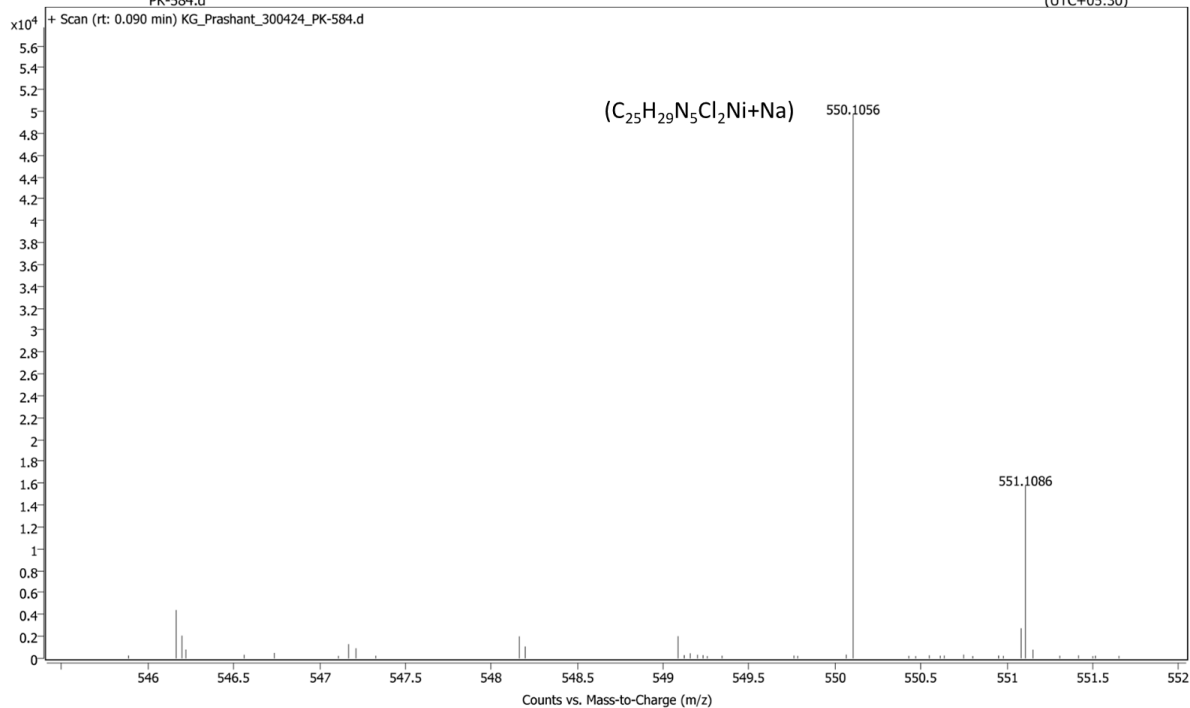

Figure S12 – HRMS spectrum of C1 = [Ni(II)(L1)Cl<sub>2</sub>]

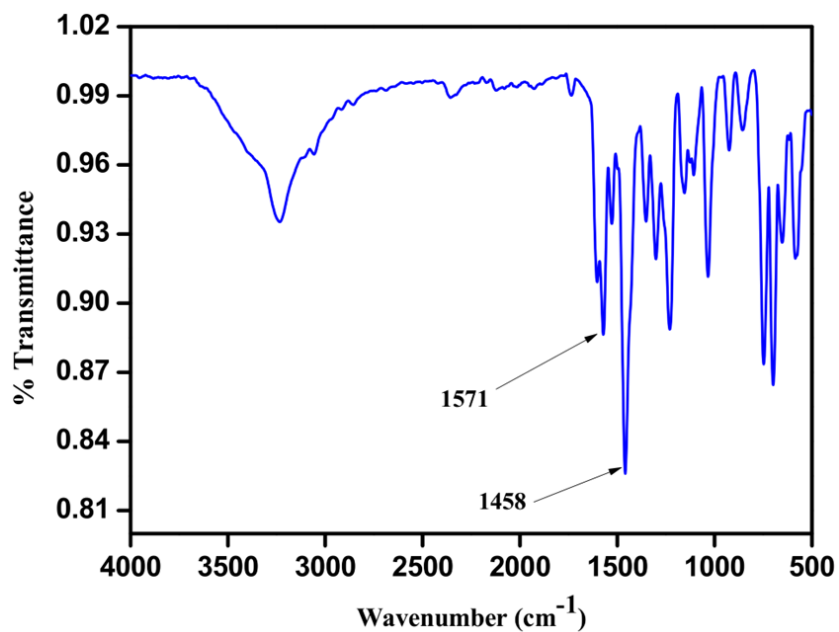

Figure S13 - IR spectrum of C2 = [Ni(II)(L2)Cl<sub>2</sub>]

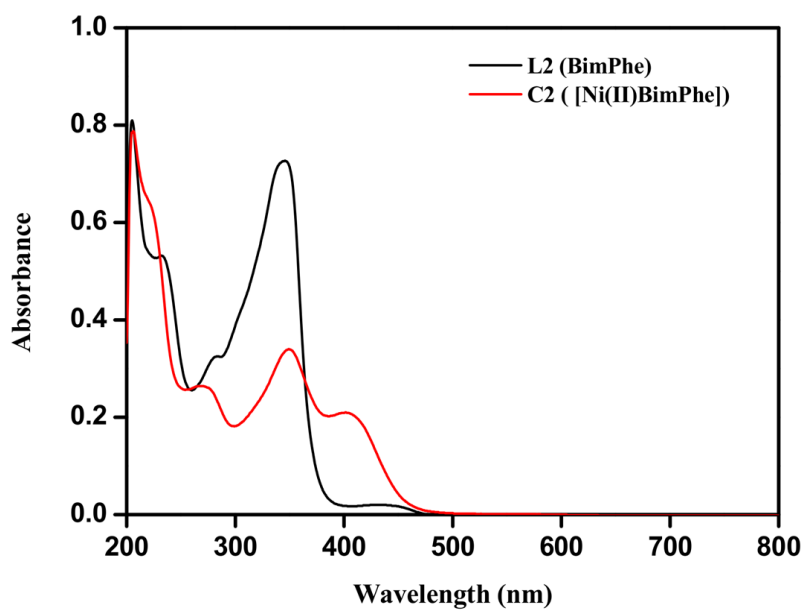

Figure S14 - UV visible spectrum of L2 and C2 = [Ni(II)(L2)Cl<sub>2</sub>]

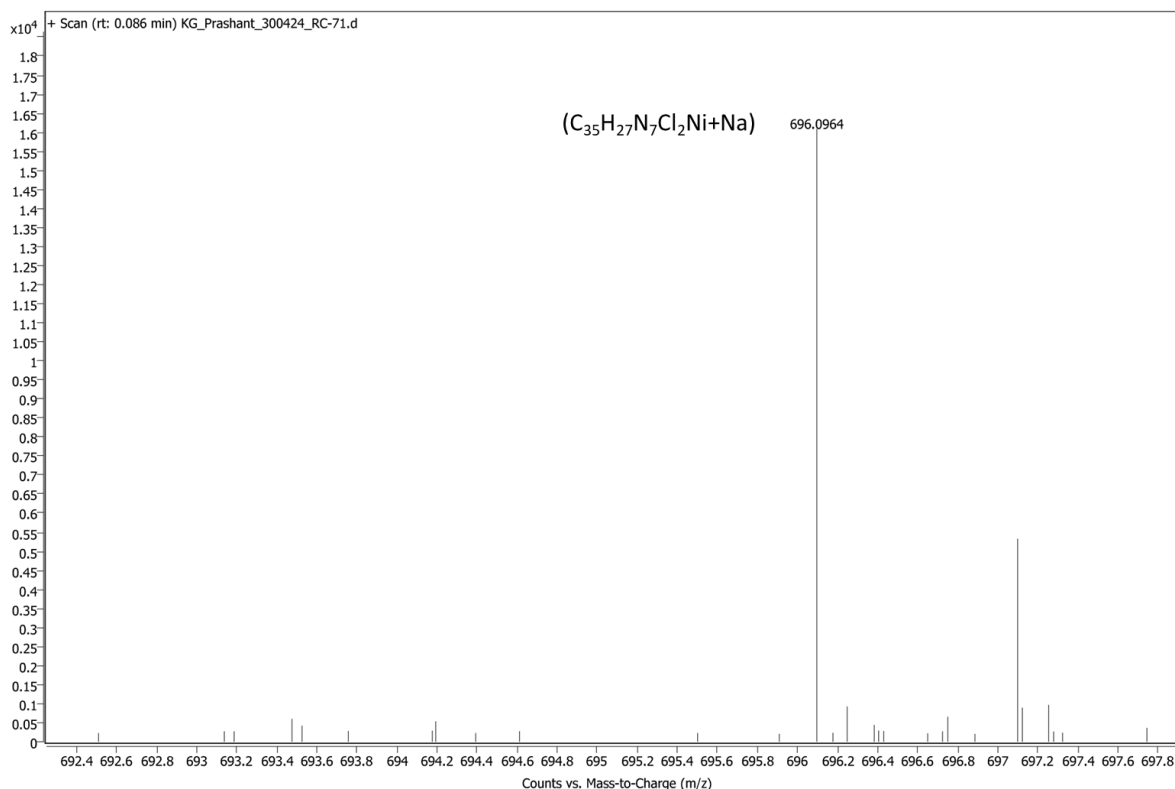

Figure S15 – HRMS spectrum of C2 = [Ni(II)(L2)Cl<sub>2</sub>]

## 5. Single crystal XRD characterization

| Identification                     | C1 = [Ni(II)(L1)Cl <sub>2</sub> ]                                 | C2 = [Ni(II)(L2)Cl <sub>2</sub> ]                                 |
|------------------------------------|-------------------------------------------------------------------|-------------------------------------------------------------------|
| Empirical formula                  | C <sub>25</sub> H <sub>29</sub> Cl <sub>2</sub> N <sub>5</sub> Ni | C <sub>35</sub> H <sub>27</sub> Cl <sub>2</sub> N <sub>7</sub> Ni |
| Formula weight                     | 529.14                                                            | 675.24                                                            |
| Temperature/K                      | 101.0                                                             | 115.0                                                             |
| Crystal system                     | monoclinic                                                        | monoclinic                                                        |
| Space group                        | C2/c                                                              | P2 <sub>1</sub> /n                                                |
| a/Å                                | 22.0346(10)                                                       | 22.7783(11)                                                       |
| b/Å                                | 9.1005(4)                                                         | 12.1608(6)                                                        |
| c/Å                                | 14.6912(6)                                                        | 26.3729(12)                                                       |
| α/°                                | 90                                                                | 90                                                                |
| β/°                                | 118.8650(10)                                                      | 114.322(2)                                                        |
| γ/°                                | 90                                                                | 90                                                                |
| Volume/Å <sup>3</sup>              | 2580.0(2)                                                         | 6657.0(6)                                                         |
| Z                                  | 4                                                                 | 8                                                                 |
| ρ <sub>calc</sub> /cm <sup>3</sup> | 1.362                                                             | 1.347                                                             |
| μ/mm <sup>-1</sup>                 | 0.981                                                             | 0.779                                                             |

|                                             |                                                               |                                                                |
|---------------------------------------------|---------------------------------------------------------------|----------------------------------------------------------------|
| F(000)                                      | 1104.0                                                        | 2784.0                                                         |
| Crystal size/mm <sup>3</sup>                | 0.192 × 0.092 × 0.047                                         | 0.105 × 0.073 × 0.026                                          |
| Radiation                                   | MoK $\alpha$ ( $\lambda$ = 0.71073)                           | MoK $\alpha$ ( $\lambda$ = 0.71073)                            |
| 2 $\theta$ range for data collection/°      | 4.222 to 56.666                                               | 4.592 to 56.716                                                |
| Index ranges                                | -29 ≤ h ≤ 29, -12 ≤ k ≤ 12, -19 ≤ l ≤ 19                      | -30 ≤ h ≤ 30, -16 ≤ k ≤ 16, -35 ≤ l ≤ 35                       |
| Reflections collected                       | 54268                                                         | 244773                                                         |
| Independent reflections                     | 3180 [R <sub>int</sub> = 0.0563, R <sub>sigma</sub> = 0.0233] | 16576 [R <sub>int</sub> = 0.0885, R <sub>sigma</sub> = 0.0422] |
| Data/restraints/parameters                  | 3180/0/153                                                    | 16576/0/823                                                    |
| Goodness-of-fit on F <sup>2</sup>           | 1.152                                                         | 1.047                                                          |
| Final R indexes [ $I \geq 2\sigma(I)$ ]     | R <sub>1</sub> = 0.0339, wR <sub>2</sub> = 0.0783             | R <sub>1</sub> = 0.0515, wR <sub>2</sub> = 0.1242              |
| Final R indexes [all data]                  | R <sub>1</sub> = 0.0355, wR <sub>2</sub> = 0.0791             | R <sub>1</sub> = 0.0702, wR <sub>2</sub> = 0.1339              |
| Largest diff. peak/hole / e Å <sup>-3</sup> | 0.61/-0.37                                                    | 1.20/-0.61                                                     |

**Table S1** – Crystal data collections and refinement parameters for **C1** and **C2**

### 5.1 Single crystal structure of **C1** = [Ni(II)(L1)Cl<sub>2</sub>]

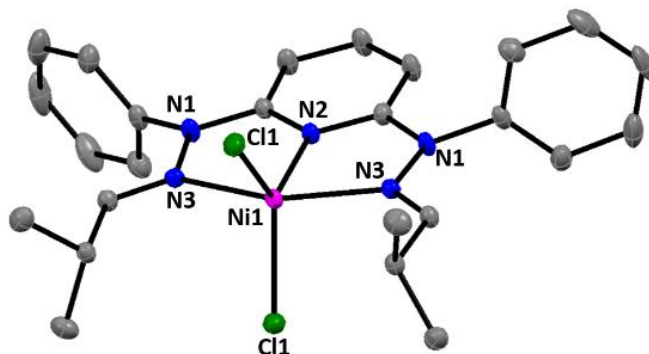

**Figure S16** - ORTEP diagram (25% probability level) of **C1** = [Ni(II)(L1)Cl<sub>2</sub>] hydrogen atoms connected to C atoms, anion and solvent molecule are omitted for clarity.

| Bond    | Bond angles (Å) | Bond  | Bond length (Å) |
|---------|-----------------|-------|-----------------|
| Ni1 Cl1 | 2.2674(5)       | N1 C1 | 1.439(2)        |
| Ni1 N2  | 1.963(2)        | N2 C7 | 1.341(2)        |
| Ni1 N3  | 2.1590(15)      | N3 C8 | 1.281(2)        |
| N1 N3   | 1.402(2)        |       |                 |

**Table S2** – Selected bond lengths of **C1** = [Ni(II)(L1)Cl<sub>2</sub>].

| Bond<br>( <sup>1-x,+y,3/2-z</sup> )  | Bond angles (°) | Bond<br>( <sup>1-x,+y,3/2-z</sup> ) | Bond angles (°) |
|--------------------------------------|-----------------|-------------------------------------|-----------------|
| Cl1 <sup>1</sup> Ni1 Cl1             | 124.72(3)       | N3 Ni1 Cl1 <sup>1</sup>             | 94.71(4)        |
| N2 Ni1 Cl1 <sup>1</sup>              | 117.640(14)     | N3 Ni1 Cl1                          | 96.81(4)        |
| N2 Ni1 Cl1                           | 117.639(14)     | N3 <sup>1</sup> Ni1N3               | 155.02(8)       |
| N2 Ni1 N3 <sup>1</sup>               | 77.51(4)        | C7 <sup>1</sup> N2 Ni1              | 119.96(11)      |
| N2 Ni1 N3                            | 77.51(4)        | C7 N2 Ni1                           | 119.96(11)      |
| N3 <sup>1</sup> Ni1 Cl1              | 94.71(4)        | N1 N3 Ni1                           | 110.43(10)      |
| N3 <sup>1</sup> Ni1 Cl1 <sup>1</sup> | 96.81(4)        | C8 N3 Ni1                           | 131.16(13)      |

**Table S3** – Selected bond angles of C1 = [Ni(II)(L1)Cl<sub>2</sub>].

## 5.2 Single crystal structure of C2 = [Ni(II)(L2)Cl<sub>2</sub>]

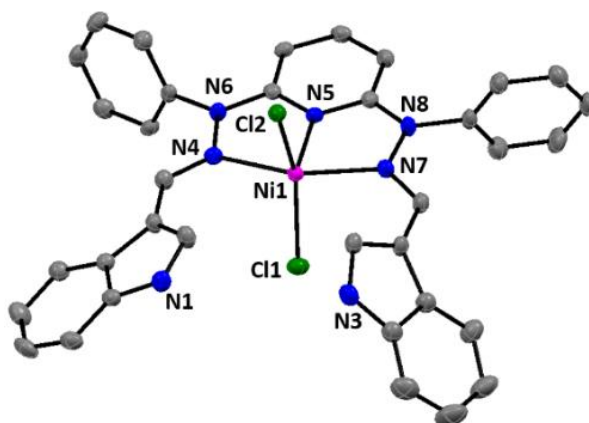

**Figure S17** - ORTEP diagram (25% probability level) of C2 = [Ni(II)(L2)Cl<sub>2</sub>] hydrogen atoms connected to C atoms, anion and solvent molecule are omitted for clarity.

| Bond    | Bond length (Å) | Bond   | Bond length (Å) |
|---------|-----------------|--------|-----------------|
| Ni1 Cl1 | 2.2495(7)       | N4 N6  | 1.400(3)        |
| Ni1 Cl2 | 2.3256(7)       | N4 C9  | 1.287(3)        |
| Ni1 N4  | 2.104(2)        | N7 N8  | 1.401(3)        |
| Ni1 N5  | 1.939(2)        | N7 C27 | 1.287(3)        |
| Ni1 N7  | 2.109(2)        |        |                 |

**Table S4** – Selected bond lengths of C2 = [Ni(II)(L2)Cl<sub>2</sub>]

| Bond        | Bond angles (°) | Bond       | Bond angles (°) |
|-------------|-----------------|------------|-----------------|
| Cl1 Ni1 Cl2 | 144.74(3)       | N7 Ni1 Cl1 | 93.34(6)        |
| N4 Ni1 Cl1  | 95.38(6)        | N7 Ni1 Cl2 | 93.72(6)        |

|            |           |            |            |
|------------|-----------|------------|------------|
| N4 Ni1 Cl2 | 90.88(6)  | N6 N4 Ni1  | 109.82(15) |
| N4 Ni1N7   | 157.78(8) | C9 N4 Ni1  | 131.19(18) |
| N5 Ni1 Cl1 | 116.96(7) | C10 N5 Ni1 | 119.18(17) |
| N5 Ni1 Cl2 | 98.30(7)  | C14 N5 Ni1 | 119.39(17) |
| N5 Ni1 N4  | 79.01(9)  | N8 N7 Ni1  | 110.10(15) |
| N5 Ni1 N7  | 78.81(9)  | C27 N7 Ni1 | 130.01(18) |

**Table S5** – Selected bond angles of **C2** = [Ni(II)(L2)Cl<sub>2</sub>]

### 5.3. DFT calculations

To acquire a better understanding of the electronic structure of the complexes, DFT simulations were performed. Gauss-view software was used to obtain Molecular orbital diagrams (MOs) and calculate the HOMO-LUMO energy gap for the complexes **C1** and **C2**. (shown in Figure 5). The Multwfn software was used to compute the percentage distribution of atoms to every MO.<sup>59</sup> The energy gap between HOMO and LUMO of complex **C1** was found to be 4.365 eV for the  $\alpha$ -spin state, and 3.788 eV for the  $\beta$ -spin state, whereas, for complex **C2**, this energy gap was found to be 3.611 eV for the  $\alpha$ -spin state and 3.081 eV for the  $\beta$ -spin state. In the gaseous state, the HOMO (124) of complex **C1** had ( $\alpha$ - 0.002% and  $\beta$ - 0.015%) of nickel character and ( $\alpha$ - 99.99% and  $\beta$ - 99.98%) ligand character. However, complex **C2** had ( $\alpha$ - 0.37% and  $\beta$ - 0.73%) nickel character and ( $\alpha$ - 99.6% and  $\beta$ - 99.3%) ligand character. According to the percentage contribution of several groups/ moieties in MOs. In LUMO of **C1**, the distribution is exclusively ligand ( $\alpha$ - 98% and  $\beta$ - 17.7%) character, only ( $\alpha$ - 1.54 % and  $\beta$ - 82.3%) character existed on the nickel centre. In the case of **C2**, the distribution is exclusively ligand ( $\alpha$ - 98% and  $\beta$ - 28.4%) character, only ( $\alpha$ - 1.97 % and  $\beta$ - 71.6%) character existed on the nickel centre.

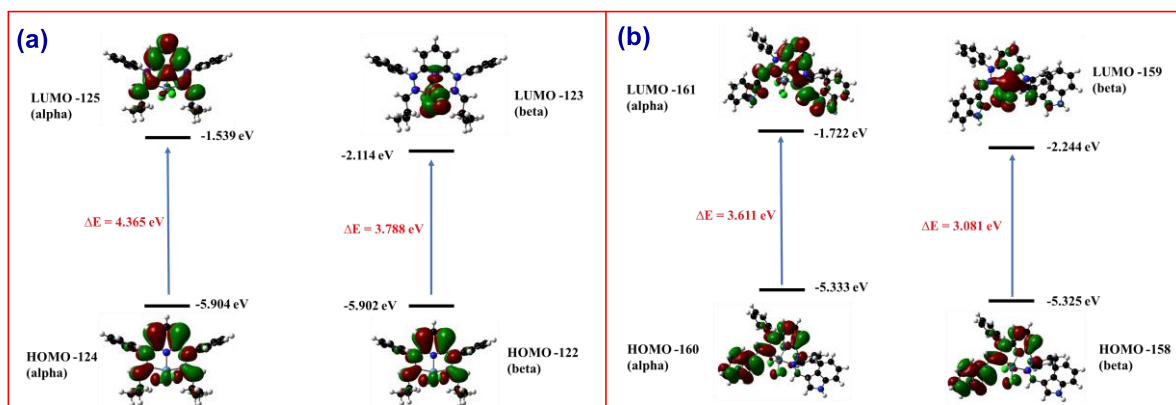

**Figure S18.** HOMO and LUMO energy representation of **C1** (a) and **C2** (b)

## 6. Optimization of reaction conditions

### 6.1. Optimization of base

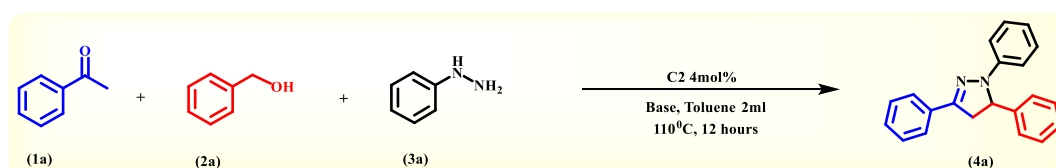

| Entry | Catalyst (C1 or C2) mol%             | Base                                  | Temp. (°C) | Solvent | Time (hrs) | Yield (%) |
|-------|--------------------------------------|---------------------------------------|------------|---------|------------|-----------|
| 1     | -                                    | <sup>t</sup> BuOK 1.0eq               | 110        | Toluene | 12         | NR        |
| 2     | L1 or L2                             | <sup>t</sup> BuOK 1eq                 | 110        | Toluene | 12         | NR        |
| 3     | NiCl <sub>2</sub> .4H <sub>2</sub> O | <sup>t</sup> BuOK 1eq                 | 110        | Toluene | 12         | NR        |
| 4     | C1 4 mol%                            | <sup>t</sup> BuOK 1.0eq               | 110        | Toluene | 12         | 82        |
| 2     | C2 4 mol%                            | <sup>t</sup> BuOK 1.0eq               | 110        | Toluene | 12         | 88        |
| 3     | C2 4 mol%                            | KOH 1.0eq                             | 110        | Toluene | 12         | 79        |
| 4     | C2 4 mol%                            | NaOH 1.0eq                            | 110        | Toluene | 12         | 72        |
| 5     | C2 4 mol%                            | Cs <sub>2</sub> CO <sub>3</sub> 1.0eq | 110        | Toluene | 12         | 66        |
| 6     | C2 4 mol%                            | Na <sub>2</sub> CO <sub>3</sub> 1.0eq | 110        | Toluene | 12         | NR        |
| 7     | C2 4 mol%                            | K <sub>2</sub> CO <sub>3</sub> 1.0eq  | 110        | Toluene | 12         | NR        |
| 8     | C2 4 mol%                            | NaHCO <sub>3</sub> 1.0eq              | 110        | Toluene | 12         | NR        |

**Reaction conditions and stoichiometry:** benzyl alcohol (1a) (0.5 mmol), acetophenone (2a) (0.5 mmol), and phenylhydrazine (3a) (0.6 mmol); temperature 110 °C; base: 1.0 equivalent, solvent: Toluene 2ml, catalyst 4mol% and time 12 hours. Isolated yields after column chromatography.

## 6.2. Optimization of base equivalent

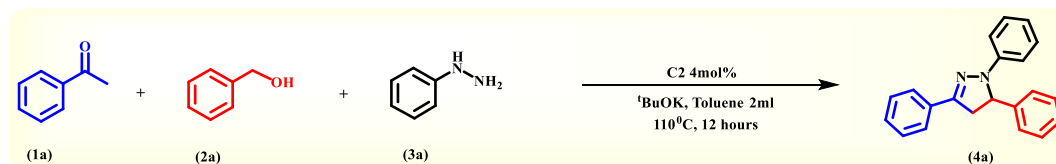

| Entry | Catalyst (C2) mol% | Base                    | Temp. (°C) | Solvent | Time (hrs) | Yield (%) |
|-------|--------------------|-------------------------|------------|---------|------------|-----------|
| 1     | 4 mol%             | <sup>t</sup> BuOK .5eq  | 110        | Toluene | 12         | 55        |
| 2     | 4 mol%             | <sup>t</sup> BuOK 1eq   | 110        | Toluene | 12         | 88        |
| 3     | 4 mol%             | <sup>t</sup> BuOK 1.5eq | 110        | Toluene | 12         | 88        |
| 4     | 4 mol%             | <sup>t</sup> BuOK 2eq   | 110        | Toluene | 12         | 88        |

**Reaction conditions and stoichiometry:** benzyl alcohol (1a) (0.5 mmol), acetophenone (2a) (0.5 mmol), and phenylhydrazine (3a) (0.6 mmol); temperature 110 °C; <sup>t</sup>BuOK: 0.5- 2.0 equivalent, solvent: Toluene 2ml, catalyst 4mol% and time 12 hours. Isolated yields after column chromatography.

## 6.3. Optimization of solvent



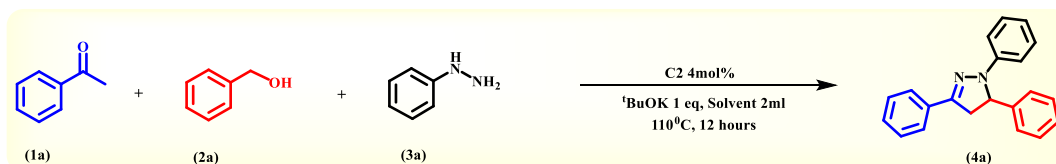

| Entry | Catalyst (C2)<br>mol% | Base                  | Temp.<br>(°C) | Solvent        | Time (hrs) | Yield (%) |
|-------|-----------------------|-----------------------|---------------|----------------|------------|-----------|
| 1     | 4 mol%                | <sup>t</sup> BuOK 1eq | 110           | Toluene        | 12         | 88        |
| 2     | 4 mol%                | <sup>t</sup> BuOK 1eq | 110           | Xylene         | 12         | 70        |
| 3     | 4 mol%                | <sup>t</sup> BuOK 1eq | 110           | Benzene        | 12         | 65        |
| 4     | 4 mol%                | <sup>t</sup> BuOK 1eq | 110           | DMF            | 12         | NR        |
| 5     | 4 mol%                | <sup>t</sup> BuOK 1eq | 110           | DMDO           | 12         | NR        |
| 6     | 4 mol%                | <sup>t</sup> BuOK 1eq | 110           | t-amyl alcohol | 12         | NR        |
| 7     | 4 mol%                | <sup>t</sup> BuOK 1eq | 110           | 1,4-dioxane    | 12         | 20%       |

**Reaction conditions and stoichiometry:** benzyl alcohol (1a) (0.5 mmol), acetophenone (2a) (0.5 mmol), and phenylhydrazine (3a) (0.6 mmol); temperature 110 °C; <sup>t</sup>BuOK: 1.0 equivalent, solvent 2ml, catalyst 4mol% and time 12 hours. Isolated yields after column chromatography.

#### 6.4. Optimization of catalyst mol%

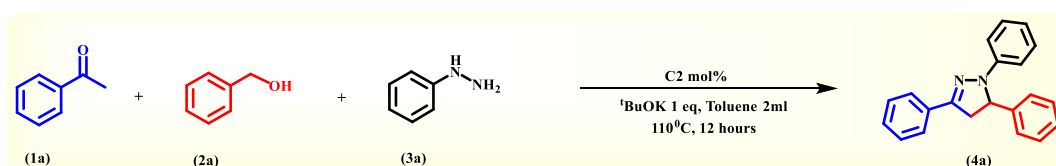

| Entry | Catalyst mol% | Base                  | Temp. (°C) | Solvent | Time (hrs) | Yield (%) |
|-------|---------------|-----------------------|------------|---------|------------|-----------|
| 1     | 2 mol%        | <sup>t</sup> BuOK 1eq | 110        | Toluene | 12         | 52        |
| 2     | 3 mol%        | <sup>t</sup> BuOK 1eq | 110        | Toluene | 12         | 64        |
| 3     | 4 mol%        | <sup>t</sup> BuOK 1eq | 110        | Toluene | 12         | 88        |
| 4     | 5 mol%        | <sup>t</sup> BuOK 1eq | 110        | Toluene | 12         | 88        |

**Reaction conditions and stoichiometry:** benzyl alcohol (1a) (0.5 mmol), acetophenone (2a) (0.5 mmol), and phenylhydrazine (3a) (0.6 mmol); temperature 110 °C; base: 1.0 equivalent, solvent: Toluene 2ml, Catalyst mol% 2-5 and time 12 hours. Isolated yields after column chromatography.

#### 6.5. Optimization of time

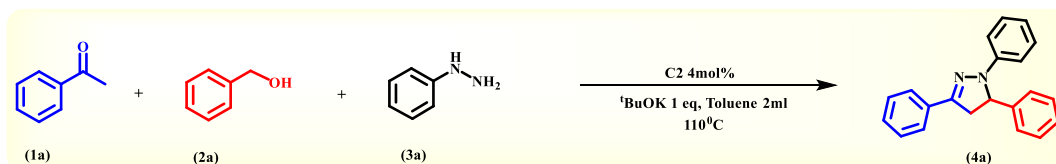

| Entry | Catalyst mol% | Base                  | Temp. (°c) | Solvent | Time (hrs) | Yield (%) |
|-------|---------------|-----------------------|------------|---------|------------|-----------|
| 1     | 4 mol%        | <sup>t</sup> BuOK 1eq | 110        | Toluene | 8          | 61        |
| 2     | 4 mol%        | <sup>t</sup> BuOK 1eq | 110        | Toluene | 10         | 75        |
| 3     | 4 mol%        | <sup>t</sup> BuOK 1eq | 110        | Toluene | 12         | 88        |
| 4     | 4 mol%        | <sup>t</sup> BuOK 1eq | 110        | Toluene | 14         | 88        |

**Reaction conditions and stoichiometry:** benzyl alcohol (1a) (0.5 mmol), acetophenone (2a) (0.5 mmol), and phenylhydrazine (3a) (0.6 mmol); temperature 110 °C; base: 1.0 equivalent, solvent: Toluene 2ml, Catalyst 4 mol% and time 8-12 hours. Isolated yields after column chromatography.

### 6.6. Optimization of temperature

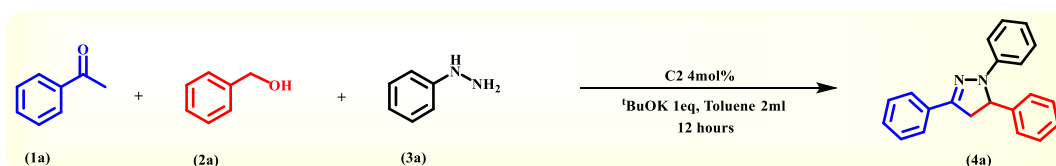

| Entry | Catalyst mol% | Base                  | Temp. (°c) | Solvent | Time (hrs) | Yield (%) |
|-------|---------------|-----------------------|------------|---------|------------|-----------|
| 1     | 4 mol%        | <sup>t</sup> BuOK 1eq | 90         | Toluene | 12         | 68        |
| 2     | 4 mol%        | <sup>t</sup> BuOK 1eq | 100        | Toluene | 12         | 76        |
| 3     | 4 mol%        | <sup>t</sup> BuOK 1eq | 110        | Toluene | 12         | 88        |
| 4     | 4 mol%        | <sup>t</sup> BuOK 1eq | 120        | Toluene | 12         | 88        |

**Reaction conditions and stoichiometry:** benzyl alcohol (1a) (0.5 mmol), acetophenone (2a) (0.5 mmol), and phenylhydrazine (3a) (0.6 mmol); temperature 90-110 °C; base: 1.0 equivalent, solvent: Toluene 2ml, Catalyst 4 mol% and time 12 hours. Isolated yields after column chromatography.

### 6.7. Optimization of substrates

We have also performed reaction with secondary alcohol and it has been found out that aromatic ketones providing much better results than secondary alcohols. Utilizing 1-phenylethanol in the place of acetophenone with benzyl alcohol with phenyl hydrazine catalyst C1 provides 32% and C2 provides 38% yield of the respective pyrazoline derivative.

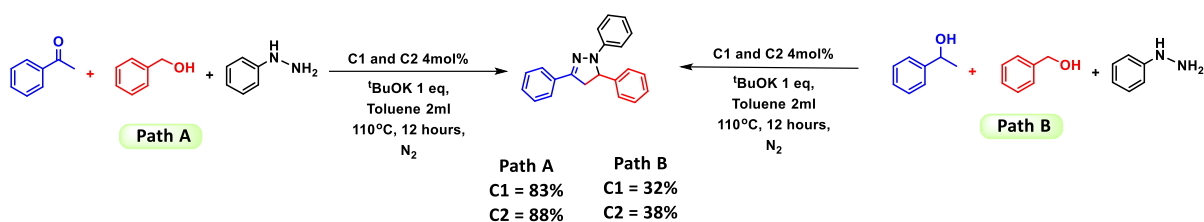

we have performed a reaction utilizing alkyhydrazines and hydrazide in place of phenylhydrazine. It has been observed that benzhydrazide is incompatible for current methodology and we did not observe the formation of the respective pyrazoline derivative.

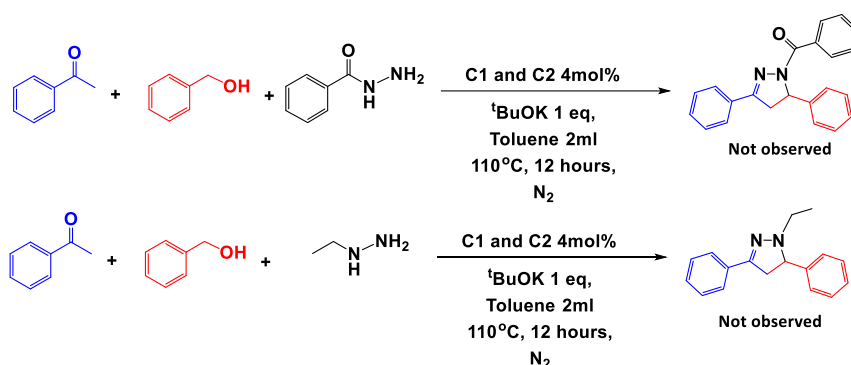

## 6.7. General procedure for MCS of pyrazolines

In a clean and dried 20 ml pressure tube filled with benzyl alcohol derivative (0.5 mmol), acetophenone derivative (0.5 mmol), phenylhydrazine (0.5 mmol), <sup>t</sup>BuOK (1.0 equivalent) and catalyst (C1 or C2 4.0 mol%). The charged vial was filled with 2.0 mL of toluene and inert atmosphere was created by purging N<sub>2</sub> to reaction tube. The reaction mixture was heated in an oil bath at 110°C for next 12 hours. TLC was used to track the reaction's completion and ethyl acetate (4 × 5 mL) was used to extract the reaction mixture. After being dried over anhydrous Na<sub>2</sub>SO<sub>4</sub>, the resultant organic layer of ethyl acetate was concentrated under reduced pressure. Hexane/ethyl acetate was used as an eluent in column chromatography on silica (100–200 mesh size) to purify the resultant organic mixture. <sup>1</sup>H and <sup>13</sup>C NMR spectroscopy were used to characterize the isolated products.

## 6.8. Gram Scale synthesis

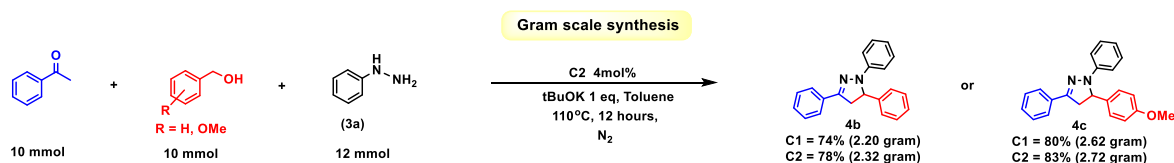

In a clean and dried 20 ml pressure tube filled with benzyl alcohol derivative (10 mmol), acetophenone derivative (10 mmol), phenylhydrazine (12 mmol), <sup>t</sup>BuOK (1.0 equivalent) and catalyst (C1 or C2 4.0 mol%). The charged vial was filled with 30 mL of toluene and inert atmosphere was created by purging N<sub>2</sub> to reaction tube. The reaction mixture was heated in an oil bath at 110°C for next 12 hours.

## 7. Characterization of intermediates and side product (H<sub>2</sub>) by GC-MS

## 7.1 Detection of H<sub>2</sub> via styrene reduction in presence of 10% Pd-C

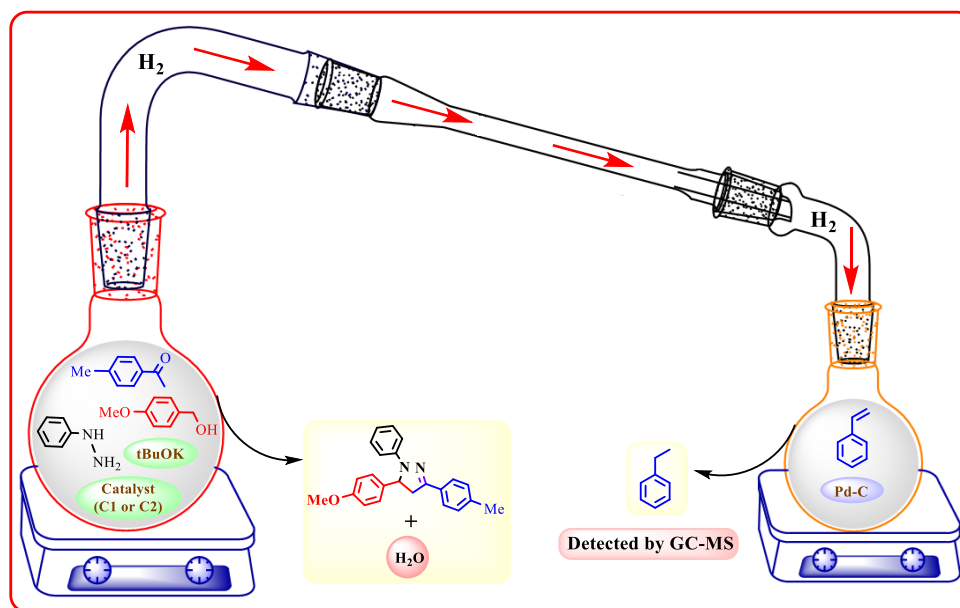

In a round bottom 20 ml flask 4-methyl acetophenone (2.0 mmol), 4-methoxy benzyl alcohol (2.0 mmol), Phenylhydrazine (2.0 mmol), tBuOK (1.0 equivalent) and catalyst (C1 or C2, 4 mol%) were taken in 8 ml toluene. This round bottom flask then connected to another round bottom flask having styrene (2.0 mmol) with 10% Pd-C in 10 ml THF by a U-shaped glass pipeline then sealed. First round bottom flask heated at 110°C and second one is stirred at room temperature for next 12 hours. The H<sub>2</sub> liberated from first round bottom flask reached to second round bottom flask through U-shaped pipeline. In presence of Pd-C reduction of styrene to ethylbenzene by H<sub>2</sub> was detected by GC-MS confirms the formation of H<sub>2</sub> during catalytic cycle.

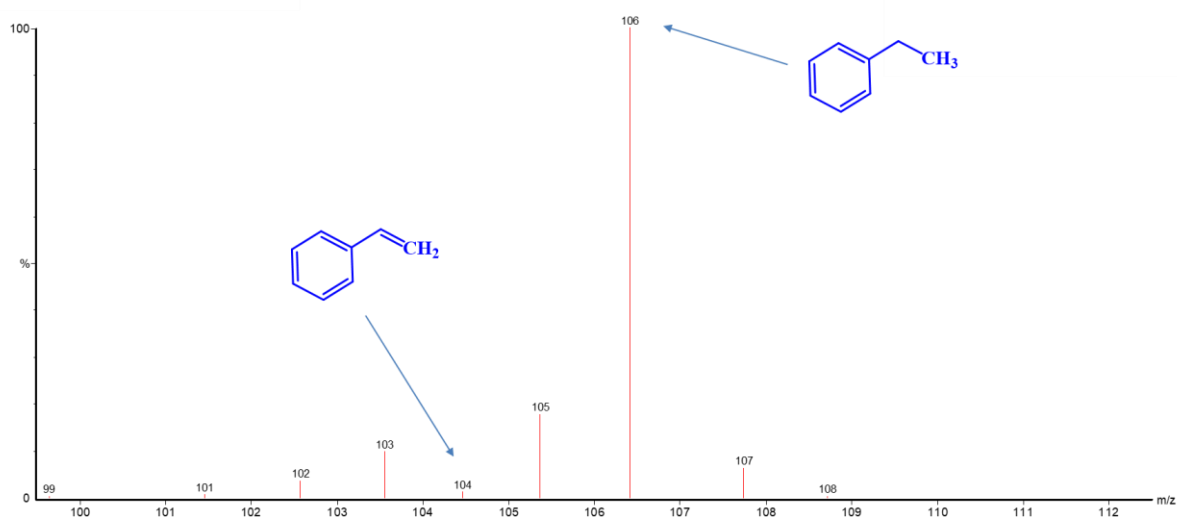

Figure S19 GC-MS spectrum of Styrene and ethyl benzene

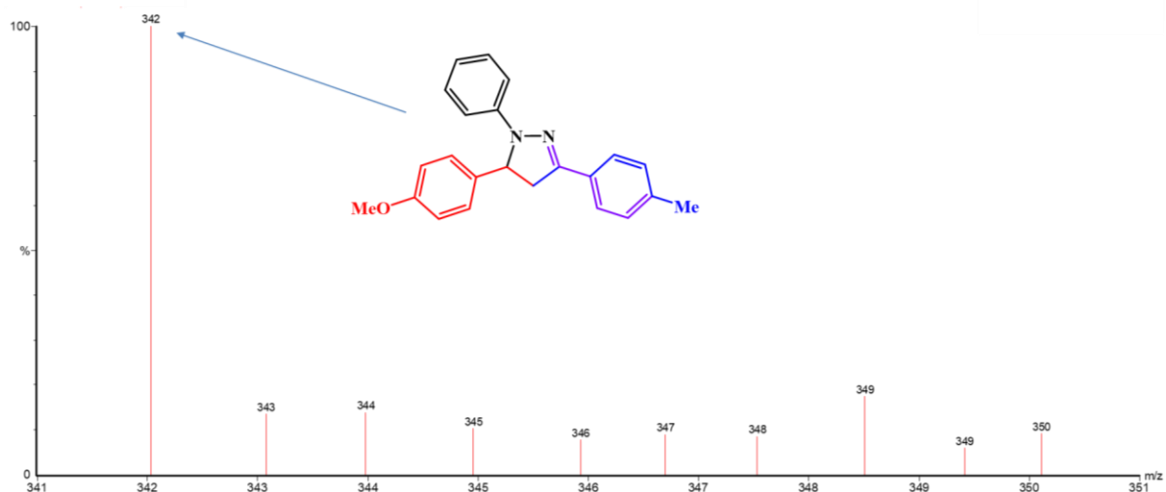

**Figure S20** GC–MS spectrum of 5-(4-methoxyphenyl)-1-phenyl-3-(p-tolyl)-4,5-dihydro-1H-pyrazole

### 7.2 Detection of in-situ formed alpha-beta unsaturated carbonyl compound

In a 10 ml pressure tube 4-methyl acetophenone (1.0 mmol), 4-methoxy benzyl alcohol (1.0 mmol), Phenylhydrazine (1.0 mmol), tBuOK (1.0 equivalent) and catalyst (C1 or C2, 4 mol%) were taken in 5 ml toluene under inert atmosphere of N<sub>2</sub>. Tube was sealed, heated at 110°C for next 4 hours after that reaction mixture was cooled at room temperature extracted with ethyl acetate and water. Formation of  $\alpha$ - $\beta$  unsaturated carbonyl compound ((E)-3-(4-methoxyphenyl)-1-(p-tolyl)prop-2-en-1-one) was then detected by GC-MS analysis.

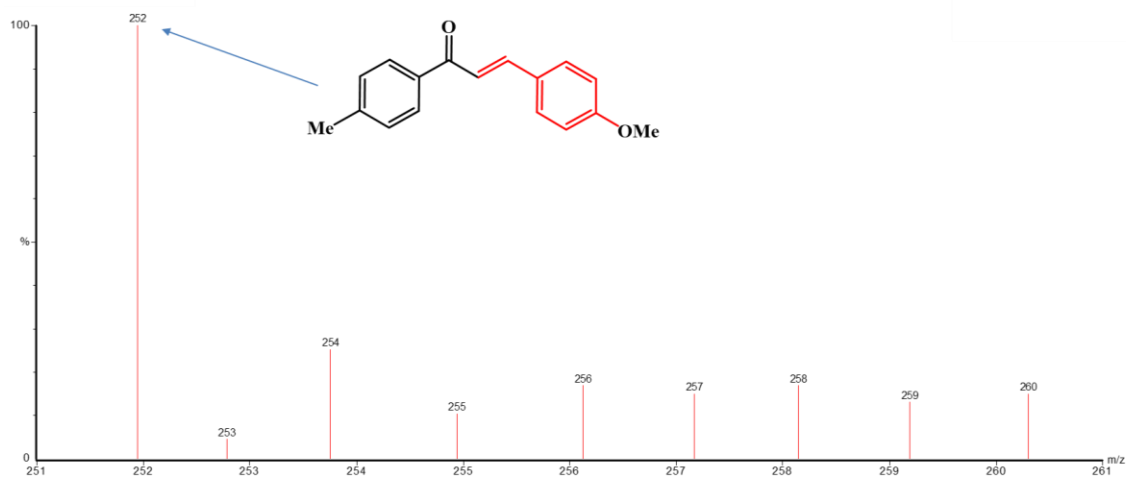

**Figure S21** GC–MS spectrum of (E)-3-(4-methoxyphenyl)-1-(p-tolyl)prop-2-en-1-one

### 7.3 Detection of Ni-H and Ni-alkoxy intermediates during catalysis

In a 10 ml pressure tube benzyl alcohol (1.0 mmol), tBuOK (0.5 equivalent), C1 or C2 (4mol%) was taken in 2 ml dry toluene. The pressure tube was then heated at 110° C for next 3 hours. Cool the reaction mixture at room temperature and Reaction mixture was analysed by HRMS study. All the nickel-hydride and nickel-alkoxy intermediate formed by the reaction of catalysts C1 and C2 with

benzyl alcohol are detected by HRMS. All experimental and calculated m/z values are shown in the table below

| Intermediates               | Experimental m/z value | calculated m/z value |
|-----------------------------|------------------------|----------------------|
| $[(L1)Ni(Cl)(H)]+H^+$       | 494.1622               | 494.1616             |
| $[(L1)Ni(Cl)(OCH_2Ph)]+H^+$ | 600.2212               | 600.2035             |
| $[(L2)Ni(Cl)(H)]+H^+$       | 640.1545               | 640.1521             |
| $[(L2)Ni(Cl)(OCH_2Ph)]$     | 745.1914               | 745.1867             |

**Table S6** – Experimental and calculated m/z value for the intermediates

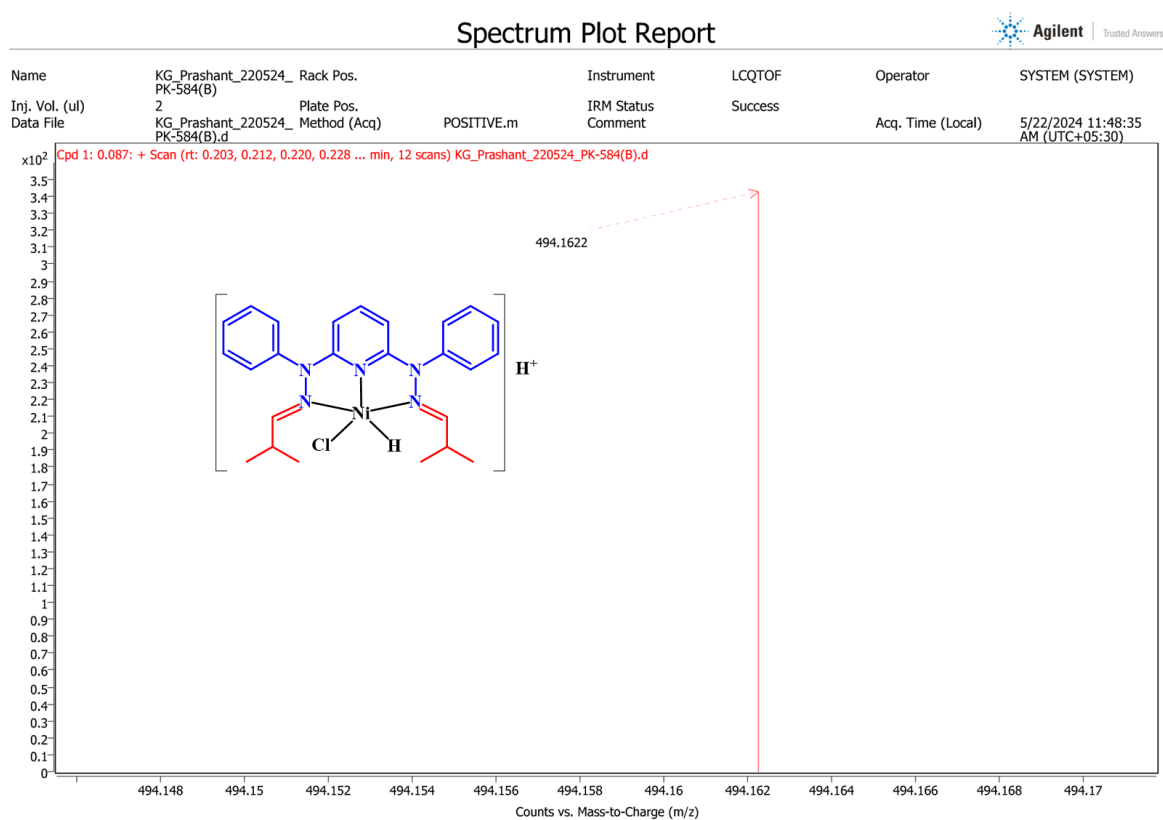

## Spectrum Plot Report

|                |                                                 |            |         |                   |                                   |
|----------------|-------------------------------------------------|------------|---------|-------------------|-----------------------------------|
| Name           | KG_Prashant_220524_ Rack Pos.<br>PK-584(B)      | Instrument | LCQTOF  | Operator          | SYSTEM (SYSTEM)                   |
| Inj. Vol. (ul) | 2                                               | IRM Status | Success |                   |                                   |
| Data File      | KG_Prashant_220524_ Method (Acq)<br>PK-584(B).d | Comment    |         | Acq. Time (Local) | 5/22/2024 11:48:35 AM (UTC+05:30) |

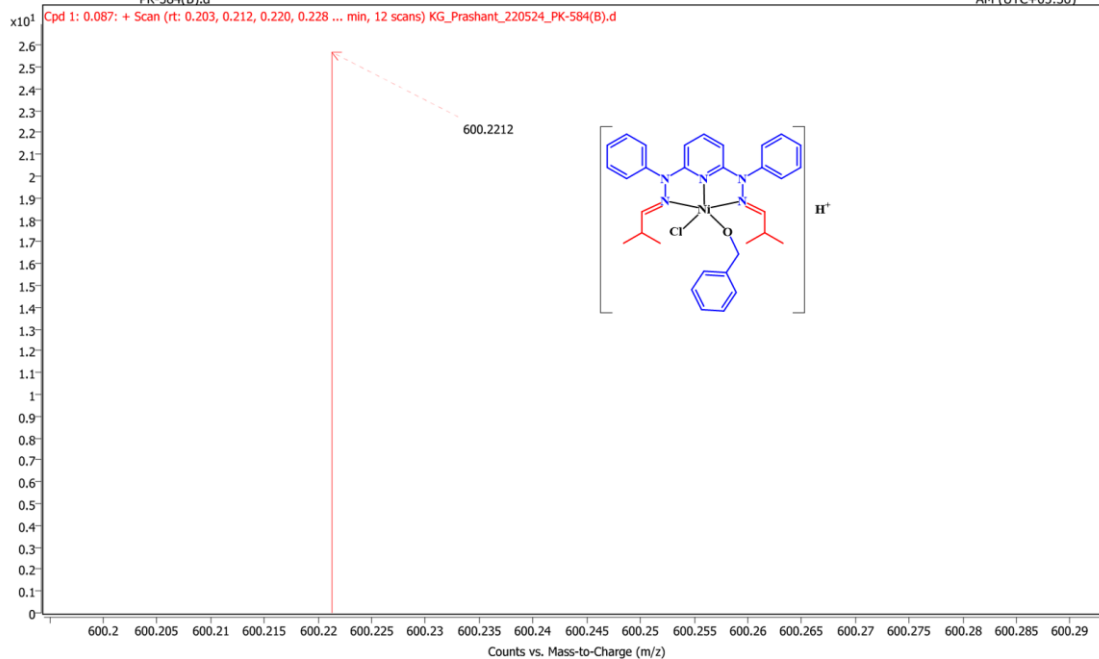

## Spectrum Plot Report

|                |                                                |            |         |                   |                                   |
|----------------|------------------------------------------------|------------|---------|-------------------|-----------------------------------|
| Name           | KG_Prashant_220524_ Rack Pos.<br>PC-71(B)      | Instrument | LCQTOF  | Operator          | SYSTEM (SYSTEM)                   |
| Inj. Vol. (ul) | 2                                              | IRM Status | Success |                   |                                   |
| Data File      | KG_Prashant_220524_ Method (Acq)<br>PC-71(B).d | Comment    |         | Acq. Time (Local) | 5/22/2024 11:51:22 AM (UTC+05:30) |

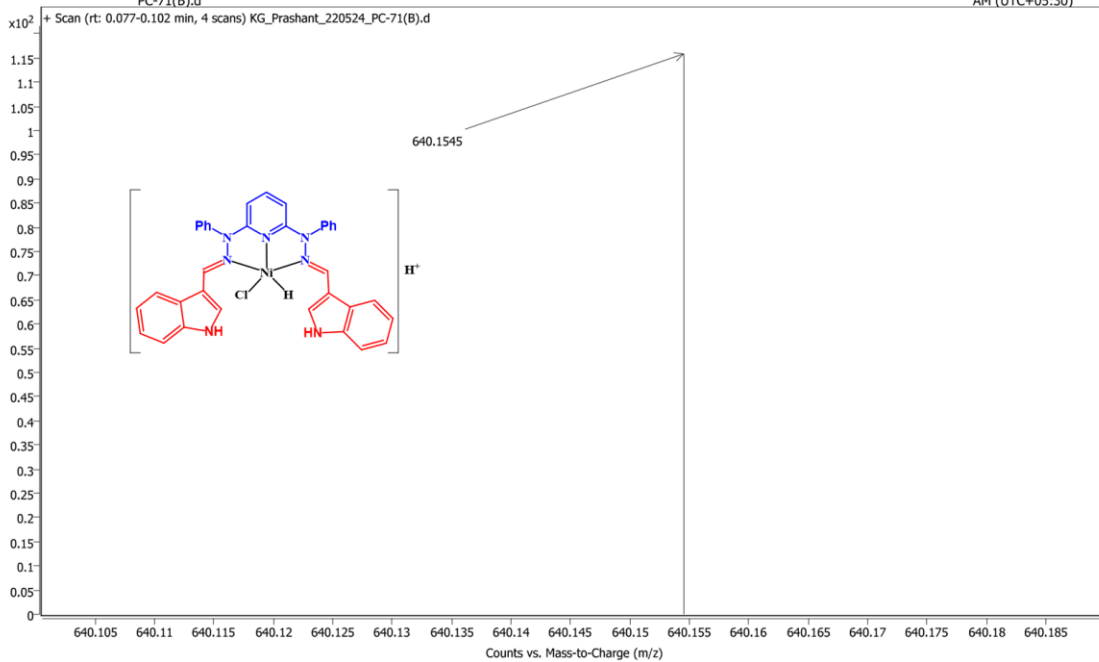

## Spectrum Plot Report

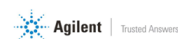

|                |                     |              |            |         |                   |                                   |
|----------------|---------------------|--------------|------------|---------|-------------------|-----------------------------------|
| Name           | KG_Prashant_220524_ | Rack Pos.    | Instrument | LCQTOF  | Operator          | SYSTEM (SYSTEM)                   |
| Inj. Vol. (ul) | 2                   | Plate Pos.   | IRM Status | Success |                   |                                   |
| Data File      | KG_Prashant_220524_ | Method (Acq) | Comment    |         | Acq. Time (Local) | 5/22/2024 11:51:22 AM (UTC+05:30) |
|                | PC-71(B)            |              |            |         |                   |                                   |
|                | PC-71(B).d          |              |            |         |                   |                                   |

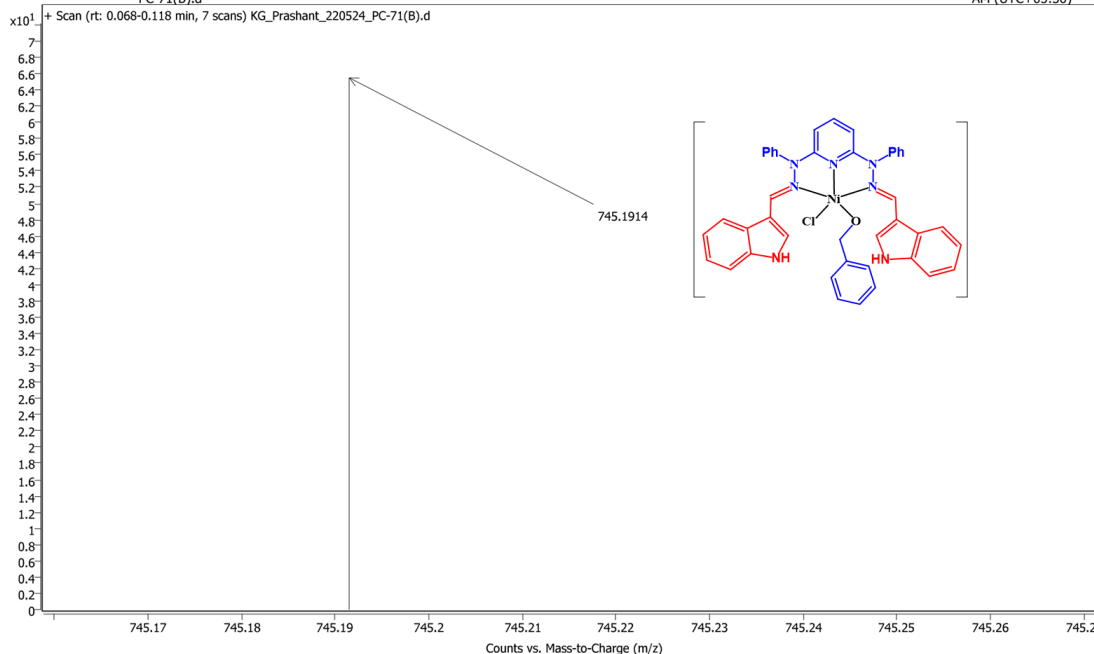

Figure S25 HRMS spectrum  $[(L_2)Ni(Cl)(OCH_2Ph)]$

#### 7.4 Synthesis of (E)-1-(4-methoxybenzylidene)-2-phenylhydrazine

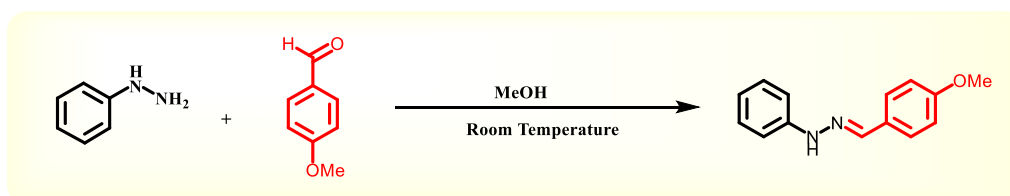

To a methanolic solution of Phenylhydrazine (2 mmol, 216 mg) in 10 ml dry methanol 4-methoxybenzaldehyde (2 mmol, 272mg ) was added dropwise with constant stirring. Reaction mixture was stirred for next 30 minute a white solid precipitate out. Precipitate was filtered, gently wash with cold methanol and dried. Yield - 389 mg (86%).  $^1H$ NMR (500 MHz)  $\delta$  7.61 – 7.57 (m, 2H), 7.52 (d,  $J$  = 2.1 Hz, 1H), 7.31 – 7.27 (m, 2H), 7.12 – 7.09 (m, 2H), 6.93 – 6.87 (m, 3H), 3.82 (s, 3H).  $^{13}C$  NMR (126 MHz)  $\delta$  160.08, 145.12, 137.62, 129.42, 128.29, 127.72, 119.86, 114.24, 112.77, 55.43.

#### 8.0. $^1H$ , $^{13}C$ and $^{19}F$ NMR characterization of products.

##### 1,3,5-triphenyl-4,5-dihydro-1H-pyrazole (4a)



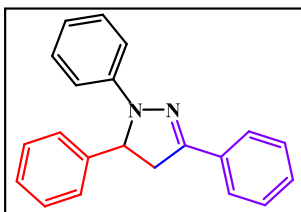

Yield: C1 = 124mg (83%) and C2 = 133mg (88%).  $^1\text{NMR}$  (500 MHz)  $\delta$  7.72 (dt,  $J$  = 8.2, 1.7 Hz, 2H), 7.40 – 7.37 (m, 2H), 7.35 – 7.30 (m, 5H), 7.26 (ddt,  $J$  = 7.0, 3.8, 1.7 Hz, 1H), 7.21 – 7.15 (m, 2H), 7.07 (ddd,  $J$  = 4.1, 3.2, 1.7 Hz, 2H), 6.78 (tt,  $J$  = 7.3, 1.1 Hz, 2H), 5.27 (dd,  $J$  = 12.4, 7.2 Hz, 1H), 3.84 (dd,  $J$  = 17.0, 12.4 Hz, 1H), 3.14 (dd,  $J$  = 17.0, 7.2 Hz, 1H).  $^{13}\text{C}$  NMR (126 MHz)  $\delta$  146.80, 144.92, 142.67, 132.81, 129.25, 129.01, 128.70, 128.65, 127.67, 125.97, 125.83, 119.17, 113.44, 64.56, 43.66.

#### 5-(4-methoxyphenyl)-1,3-diphenyl-4,5-dihydro-1H-pyrazole (4b)

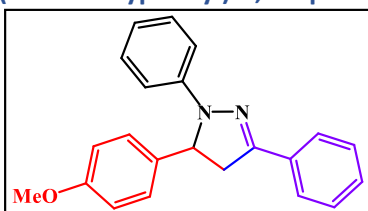

Yield: C1 = 144mg (88%), C2 = 151 mg (92%).  $^1\text{NMR}$  (500 MHz)  $\delta$  7.75 – 7.72 (m, 2H), 7.41 – 7.37 (m, 2H), 7.35 – 7.31 (m, 1H), 7.26 – 7.23 (m, 2H), 7.22 – 7.17 (m, 2H), 7.12 – 7.08 (m, 2H), 6.88 – 6.85 (m, 2H), 6.81 – 6.77 (m, 1H), 5.23 (dd,  $J$  = 12.3, 7.2 Hz, 1H), 3.81 (dd,  $J$  = 11.0, 6.0 Hz, 1H), 3.78 (s, 3H), 3.12 (dd,  $J$  = 17.0, 7.2 Hz, 1H).  $^{13}\text{C}$  NMR (126 MHz)  $\delta$  159.06, 146.82, 144.98, 134.76, 132.92, 129.00, 128.65, 127.16, 125.82, 119.15, 114.58, 113.51, 64.09, 55.37, 43.71.

#### 5-(4-chlorophenyl)-1,3-diphenyl-4,5-dihydro-1H-pyrazole (4c)

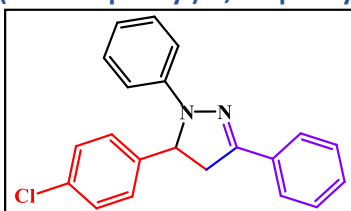

Yield: C1 = 140mg (84%), C2 = 145 mg (87%).  $^1\text{NMR}$  (500 MHz)  $\delta$  7.72 (ddd,  $J$  = 4.2, 3.4, 1.8 Hz, 2H), 7.41 – 7.37 (m, 2H), 7.35 – 7.32 (m, 1H), 7.32 – 7.29 (m, 2H), 7.27 – 7.24 (m, 2H), 7.22 – 7.17 (m, 2H), 7.07 – 7.03 (m, 2H), 6.83 – 6.79 (m, 1H), 5.24 (dd,  $J$  = 12.4, 7.2 Hz, 1H), 3.83 (dd,  $J$  = 17.0, 12.4 Hz, 1H), 3.09 (dd,  $J$  = 17.0, 7.2 Hz, 1H).  $^{13}\text{C}$  NMR (126 MHz)  $\delta$  146.82, 144.71, 141.16, 133.41, 132.61, 129.44, 129.08, 128.85, 128.69, 127.43, 125.85, 119.45, 113.47, 63.93, 43.55.

#### 5-(4-bromophenyl)-1,3-diphenyl-4,5-dihydro-1H-pyrazole (4d)

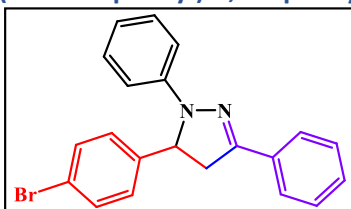

Yield: C1 = 162mg (86%), C2 = 170mg (90%).  $^1\text{NMR}$  (500 MHz)  $\delta$  7.74 – 7.70 (m, 2H), 7.49 – 7.43 (m, 2H), 7.41 – 7.37 (m, 2H), 7.36 – 7.31 (m, 2H), 7.22 – 7.20 (m, 1H), 7.20 – 7.17 (m, 2H), 7.08 – 7.02 (m, 2H), 6.83 – 6.79 (m, 1H), 5.22 (dd,  $J$  = 12.4, 7.2 Hz, 1H), 3.82 (dd,  $J$  = 17.0, 12.4 Hz, 1H), 3.09 (dd,  $J$  = 17.0, 7.2 Hz, 1H).  $^{13}\text{C}$  NMR (126 MHz)  $\delta$  146.83, 144.70, 141.69, 132.60, 132.38, 129.09, 128.86, 128.69, 127.78, 125.85, 121.50, 119.47, 113.48, 63.98, 43.50.

#### 1,3-diphenyl-5-(p-tolyl)-4,5-dihydro-1H-pyrazole (4e)

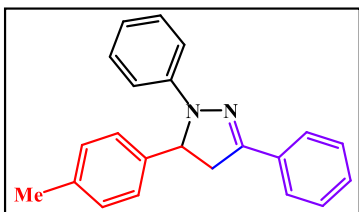

Yield: C1 = 134mg (86%), C2 = 138mg (88%).  $^1\text{NMR}$  (500 MHz)  $\delta$  7.76 – 7.71 (m, 2H), 7.41 – 7.37 (m, 2H), 7.35 – 7.31 (m, 1H), 7.24 – 7.17 (m, 4H), 7.15 (d,  $J$  = 7.8 Hz, 2H), 7.10 (dd,  $J$  = 8.8, 1.1 Hz, 2H), 6.82 – 6.77 (m, 1H), 5.24 (dd,  $J$  = 12.3, 7.2 Hz, 1H), 3.82 (dd,  $J$  = 17.0, 12.3 Hz, 1H), 3.13 (dd,  $J$  = 17.0, 7.2 Hz, 1H), 2.33 (s, 3H).  $^{13}\text{C}$  NMR (126 MHz)  $\delta$  146.82, 145.00, 139.75, 137.33, 132.91, 129.91, 129.00, 128.65, 125.91, 125.82, 119.13, 113.46, 64.37, 43.72, 21.23.

#### 5-(4-(tert-butyl)phenyl)-1,3-diphenyl-4,5-dihydro-1H-pyrazole (4f)

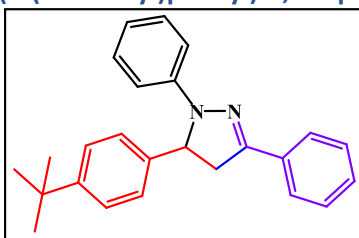

Yield: C1 = 154mg (87%), C2 = 161mg (91%).  $^1\text{NMR}$  (500 MHz)  $\delta$  7.73 (ddd,  $J$  = 4.1, 3.4, 1.7 Hz, 2H), 7.40 – 7.37 (m, 2H), 7.36 – 7.30 (m, 3H), 7.27 – 7.24 (m, 2H), 7.22 – 7.18 (m, 2H), 7.14 – 7.09 (m, 2H), 6.83 – 6.77 (m, 1H), 5.25 (dd,  $J$  = 12.3, 7.1 Hz, 1H), 3.81 (dd,  $J$  = 17.0, 12.3 Hz, 1H), 3.15 (dd,  $J$  = 17.0, 7.2 Hz, 1H), 1.31 (s, 9H).  $^{13}\text{C}$  NMR (126 MHz)  $\delta$  148.48, 147.12, 146.84, 144.88, 136.71, 132.82, 129.04, 128.74, 128.68, 125.84, 119.25, 119.23, 113.48, 108.75, 106.33, 101.24, 64.36, 43.69.

#### 1,3-diphenyl-5-(4-(trifluoromethyl)phenyl)-4,5-dihydro-1H-pyrazole (4g)

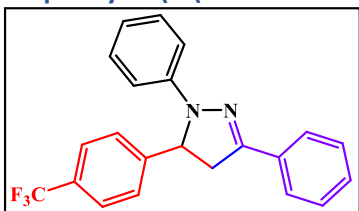

Yield: C1 = 156mg (85%), C2 = 160mg (87%).  $^1\text{NMR}$  (500 MHz)  $\delta$  7.72 (ddd,  $J$  = 4.5, 3.6, 1.9 Hz, 2H), 7.60 (dd,  $J$  = 8.8, 0.7 Hz, 2H), 7.44 (d,  $J$  = 8.9 Hz, 2H), 7.42 – 7.31 (m, 3H), 7.23 – 7.16 (m, 2H), 7.06 – 7.00 (m, 2H), 6.84 – 6.78 (m, 1H), 5.32 (dd,  $J$  = 12.8, 7.3 Hz, 1H), 3.87 (dd,  $J$  = 17.1, 12.4 Hz, 1H), 3.11 (dd,  $J$  = 17.1, 7.2 Hz, 1H).  $^{13}\text{C}$  NMR (126 MHz)  $\delta$  145.65, 144.42, 141.42, 134.53, 132.42, 131.88, 131.11, 130.27, 129.24, 129.10, 128.97, 128.89, 127.72, 127.15, 126.98, 125.41, 121.59, 119.68, 113.49, 105.25, 64.08, 43.33.  $^{19}\text{F}$  NMR (471 MHz)  $\delta$  -62.38 (s), -62.57 (s).

#### 5-(benzo[d][1,3]dioxol-5-yl)-1,3-diphenyl-4,5-dihydro-1H-pyrazole (4h)

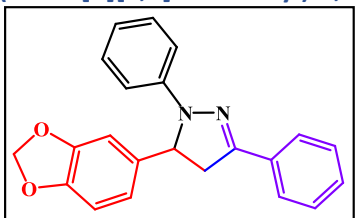

Yield: C1 = 152mg (89%), C2 = 159mg (93%).  $^1\text{NMR}$  (500 MHz)  $\delta$  7.75 – 7.72 (m, 2H), 7.42 – 7.38 (m, 2H), 7.36 – 7.32 (m, 1H), 7.24 – 7.20 (m, 2H), 7.14 – 7.10 (m, 2H), 6.84 – 6.76 (m, 4H), 5.92 (dd,  $J$  = 6.4, 1.4 Hz, 2H), 5.18 (dd,  $J$  = 12.3, 7.1 Hz, 1H), 3.78 (dd,  $J$  = 17.1, 12.3 Hz, 1H), 3.11 (dd,  $J$  = 17.1, 7.1 Hz, 1H).  $^{13}\text{C}$  NMR (126 MHz) 148.48, 147.12, 146.84, 144.88, 136.71, 132.82, 129.04, 128.74, 128.68, 125.84, 119.25, 119.23, 113.48, 108.75, 106.33, 101.24, 64.36, 43.69.

#### 5-(3-chlorophenyl)-1,3-diphenyl-4,5-dihydro-1H-pyrazole (4i)

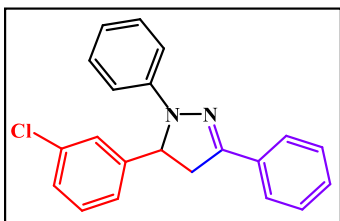

Yield: C1 = 136mg (82%), C2 = 141mg (85%). <sup>1</sup>NMR (500 MHz) δ 7.71 (ddd, *J* = 4.2, 3.4, 1.8 Hz, 2H), 7.41 – 7.36 (m, 3H), 7.35 – 7.33 (m, 2H), 7.26 – 7.23 (m, 2H), 7.21 – 7.20 (m, 1H), 7.20 – 7.18 (m, 1H), 7.07 – 7.03 (m, 2H), 6.84 – 6.79 (m, 1H), 5.22 (dd, *J* = 12.4, 7.2 Hz, 1H), 3.84 (dd, *J* = 17.1, 12.4 Hz, 1H), 3.11 (dd, *J* = 17.1, 7.2 Hz, 1H). <sup>13</sup>C NMR (126 MHz) δ 146.82, 144.82, 144.73, 135.09, 132.54, 130.64, 129.10, 128.88, 128.69, 127.98, 126.15, 125.87, 124.13, 119.48, 113.43, 64.06, 43.56.

#### 5-(3-bromophenyl)-1,3-diphenyl-4,5-dihydro-1H-pyrazole (4j)

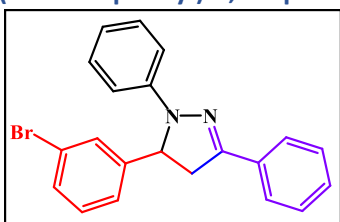

Yield: C1 = 158mg (84%), C2 = 166mg (88%). <sup>1</sup>NMR (500 MHz) δ 7.77 – 7.71 (m, 2H), 7.51 (t, *J* = 1.8 Hz, 1H), 7.43 – 7.38 (m, 3H), 7.36 – 7.33 (m, 1H), 7.26 – 7.18 (m, 4H), 7.07 (d, *J* = 7.7 Hz, 1H), 6.83 (t, *J* = 7.3 Hz, 1H), 5.21 (dd, *J* = 12.4, 7.2 Hz, 1H), 3.83 (dd, *J* = 17.1, 12.4 Hz, 1H), 3.11 (dd, *J* = 17.1, 7.2 Hz, 1H). <sup>13</sup>C NMR (126 MHz) δ 146.86, 145.12, 144.76, 132.55, 130.96, 130.93, 129.14, 129.06, 128.91, 128.71, 125.90, 124.62, 123.32, 119.52, 113.47, 64.04, 43.60.

#### 1,5-diphenyl-3-(p-tolyl)-4,5-dihydro-1H-pyrazole (4k)

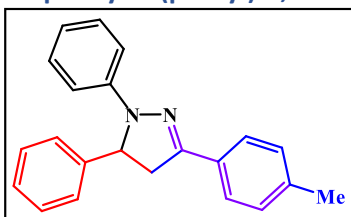

Yield: C1 = 134mg (86%), C2 = 139mg (89%). <sup>1</sup>NMR (500 MHz) δ 7.67 – 7.62 (m, 2H), 7.36 – 7.34 (m, 4H), 7.28 (ddt, *J* = 6.2, 4.5, 3.9 Hz, 1H), 7.23 – 7.19 (m, 4H), 7.13 – 7.09 (m, 2H), 6.81 (tt, *J* = 7.3, 1.1 Hz, 1H), 5.24 (dd, *J* = 12.3, 7.3 Hz, 1H), 3.82 (dd, *J* = 17.0, 12.3 Hz, 1H), 3.13 (dd, *J* = 17.0, 7.3 Hz, 1H), 2.40 (s, 3H). <sup>13</sup>C NMR (126 MHz) δ 147.07, 145.15, 142.85, 138.81, 130.08, 129.40, 129.25, 129.03, 127.65, 126.03, 125.86, 119.06, 113.45, 64.56, 43.81, 21.55.

#### 5-(4-methoxyphenyl)-1-phenyl-3-(p-tolyl)-4,5-dihydro-1H-pyrazole (4l)

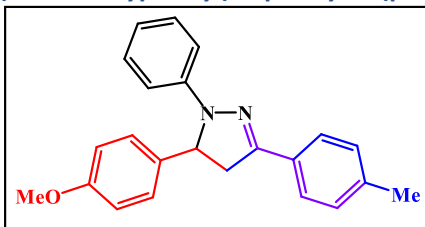

Yield: C1 = 152mg (89%), C2 = 159mg (93%). <sup>1</sup>NMR (500 MHz) δ 7.67 (d, *J* = 8.1 Hz, 2H), 7.30 – 7.27 (m, 2H), 7.23 (t, *J* = 8.1 Hz, 4H), 7.14 (d, *J* = 7.7 Hz, 2H), 6.93 – 6.89 (m, 2H), 6.83 (t, *J* = 7.2 Hz, 1H), 5.24 (dd, *J* = 12.2, 7.2 Hz, 1H), 3.85 – 3.78 (m, 4H), 3.14 (dd, *J* = 17.0, 7.3 Hz, 1H), 2.43 (s, 3H). <sup>13</sup>C NMR (126 MHz) δ 159.00, 146.99, 145.15, 138.65, 134.85, 130.12, 129.29, 128.89, 127.12, 125.75, 118.94, 114.52, 113.44, 64.03, 55.29, 43.78, 21.42.

#### 5-(4-chlorophenyl)-1-phenyl-3-(p-tolyl)-4,5-dihydro-1H-pyrazole (4m)

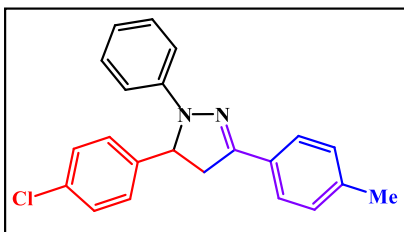

Yield: C1 = 144mg (83%), C2 = 147mg (85%).  $^1\text{NMR}$  (500 MHz)  $\delta$  7.64 (d,  $J$  = 8.2 Hz, 2H), 7.33 – 7.30 (m, 2H), 7.28 – 7.25 (m, 2H), 7.22 (ddd,  $J$  = 8.7, 4.6, 2.3 Hz, 4H), 7.07 (dt,  $J$  = 9.2, 1.7 Hz, 2H), 6.85 – 6.81 (m, 1H), 5.20 (dd,  $J$  = 12.3, 7.2 Hz, 1H), 3.79 (dd,  $J$  = 17.0, 12.3 Hz, 1H), 3.08 (dd,  $J$  = 17.0, 7.2 Hz, 1H), 2.40 (s, 3H).  $^{13}\text{C}$  NMR (126 MHz)  $\delta$  147.09, 144.94, 141.33, 138.99, 133.37, 130.10, 129.88, 129.44, 129.10, 127.49, 125.88, 119.33, 113.48, 63.91, 43.69, 21.56.

#### 5-(4-bromophenyl)-1-phenyl-3-(p-tolyl)-4,5-dihydro-1H-pyrazole (4n)

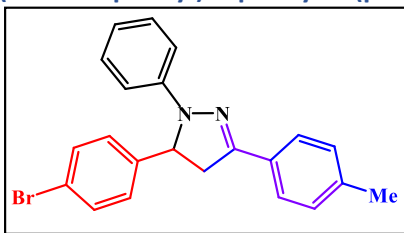

Yield: C1 = 168mg (86%), C2 = 176mg (90%).  $^1\text{NMR}$  (500 MHz)  $\delta$  7.64 – 7.61 (m, 2H), 7.48 – 7.45 (m, 2H), 7.23 – 7.19 (m, 6H), 7.08 – 7.04 (m, 2H), 6.84 – 6.80 (m, 1H), 5.19 (dd,  $J$  = 12.3, 7.2 Hz, 1H), 3.80 (dd,  $J$  = 17.0, 12.3 Hz, 1H), 3.07 (dd,  $J$  = 17.0, 7.2 Hz, 1H), 2.39 (s, 3H).  $^{13}\text{C}$  NMR (126 MHz)  $\delta$  147.08, 144.89, 141.84, 139.00, 132.37, 129.83, 129.44, 129.10, 127.83, 125.87, 121.46, 119.32, 113.44, 63.94, 43.63, 21.56.

#### 1-phenyl-3,5-di-p-tolyl-4,5-dihydro-1H-pyrazole (4o)

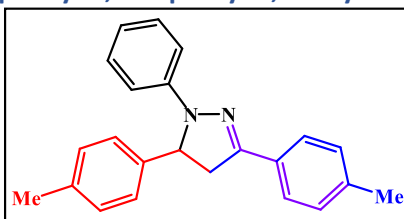

Yield: C1 = 142mg (87%), C2 = 144mg (88%).  $^1\text{NMR}$  (500 MHz)  $\delta$  7.64 – 7.60 (m, 2H), 7.23 – 7.13 (m, 9H), 7.10 – 7.07 (m, 2H), 6.77 (tt,  $J$  = 7.3, 1.1 Hz, 1H), 5.21 (dd,  $J$  = 12.3, 7.3 Hz, 1H), 3.80 (dd,  $J$  = 17.0, 12.3 Hz, 1H), 3.10 (dd,  $J$  = 17.0, 7.3 Hz, 1H), 2.38 (s, 3H), 2.32 (s, 3H).  $^{13}\text{C}$  NMR (126 MHz)  $\delta$  147.03, 145.18, 139.87, 138.72, 137.26, 130.13, 129.87, 129.34, 128.96, 125.92, 125.80, 118.96, 113.41, 64.34, 43.84, 21.50, 21.20.

#### 5-(4-(tert-butyl)phenyl)-1-phenyl-3-(p-tolyl)-4,5-dihydro-1H-pyrazole (4p)

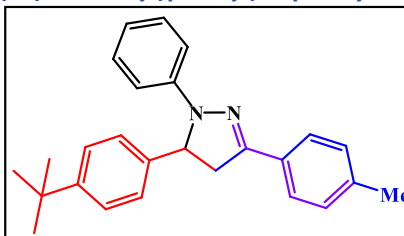

Yield: C1 = 166mg (90%), C2 = 170mg (92%).  $^1\text{NMR}$  (500 MHz)  $\delta$  7.67 – 7.64 (m, 2H), 7.40 – 7.36 (m, 2H), 7.30 – 7.27 (m, 2H), 7.25 – 7.21 (m, 4H), 7.16 – 7.13 (m, 2H), 6.82 (ddt,  $J$  = 8.4, 7.3, 1.2 Hz, 1H), 5.24 (dd,  $J$  = 12.3, 7.2 Hz, 1H), 3.80 (dd,  $J$  = 17.0, 12.3 Hz, 1H), 3.14 (dd,  $J$  = 17.0, 7.2 Hz, 1H), 2.41 (s, 3H), 1.34 (s, 9H).  $^{13}\text{C}$  NMR (126 MHz)  $\delta$  150.45, 147.13, 145.26, 139.80, 138.73, 130.17, 129.39, 129.03, 126.13, 125.86, 125.68, 118.94, 113.43, 64.21, 43.80, 34.64, 31.51, 21.56.

### 1-phenyl-3-(p-tolyl)-5-(4-(trifluoromethyl)phenyl)-4,5-dihydro-1H-pyrazole (4q)

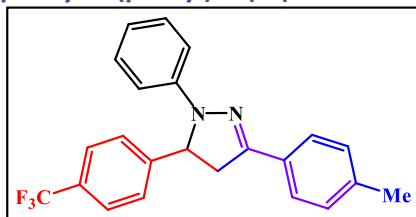

Yield: C1 = 166mg (87%), C2 = 171mg (90%).  $^1\text{NMR}$  (500 MHz)  $\delta$  7.65 – 7.60 (m, 4H), 7.45 (d,  $J$  = 8.2 Hz, 2H), 7.24 – 7.20 (m, 4H), 7.09 – 7.04 (m, 2H), 6.84 (tt,  $J$  = 7.4, 1.1 Hz, 1H), 5.28 (dd,  $J$  = 12.4, 7.2 Hz, 1H), 3.84 (dd,  $J$  = 17.0, 12.4 Hz, 1H), 3.10 (dd,  $J$  = 17.0, 7.2 Hz, 1H), 2.40 (s, 3H).  $^{13}\text{C}$  NMR (126 MHz)  $\delta$  147.10, 146.79, 144.83, 139.13, 130.08, 129.91, 129.83, 129.71, 129.46, 129.16, 129.00, 126.45, 126.35, 126.32, 126.29, 126.26, 125.89, 125.25, 123.08, 119.45, 113.42, 64.03, 43.59, 21.53.  $^{19}\text{F}$  NMR (471 MHz)  $\delta$  -62.28 (s).

### 5-(benzo[d][1,3]dioxol-5-yl)-1-phenyl-3-(p-tolyl)-4,5-dihydro-1H-pyrazole (4r)

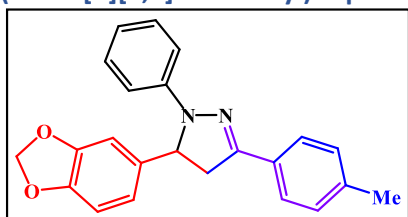

Yield: C1 = 159mg (89%), C2 = 166mg (93%).  $^1\text{NMR}$  (500 MHz)  $\delta$  7.62 (d,  $J$  = 8.2 Hz, 2H), 7.23 – 7.18 (m, 4H), 7.10 (dd,  $J$  = 8.7, 0.9 Hz, 2H), 6.83 – 6.73 (m, 4H), 5.91 (dd,  $J$  = 6.4, 1.4 Hz, 2H), 5.15 (dd,  $J$  = 12.2, 7.2 Hz, 1H), 3.76 (dd,  $J$  = 17.0, 12.3 Hz, 1H), 3.09 (dd,  $J$  = 17.0, 7.2 Hz, 1H), 2.38 (s, 3H).  $^{13}\text{C}$  NMR (126 MHz)  $\delta$  148.45, 147.07, 145.06, 138.81, 136.84, 130.04, 129.38, 129.01, 125.82, 125.37, 119.23, 119.08, 113.43, 108.72, 106.36, 101.22, 64.33, 43.81, 21.53.

### 3,5-bis(4-methoxyphenyl)-1-phenyl-4,5-dihydro-1H-pyrazole (4s)

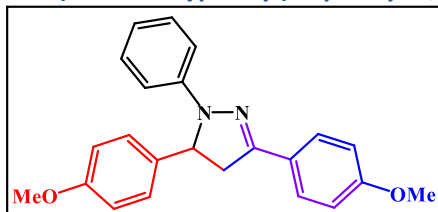

Yield: C1 = 158mg (88%), C1 = 165mg (92%).  $^1\text{NMR}$  (500 MHz)  $\delta$  7.70 – 7.65 (m, 2H), 7.26 – 7.23 (m, 2H), 7.21 – 7.16 (m, 2H), 7.08 (dd,  $J$  = 8.7, 1.0 Hz, 2H), 6.94 – 6.90 (m, 2H), 6.88 – 6.85 (m, 2H), 6.80 – 6.76 (m, 1H), 5.17 (dd,  $J$  = 12.1, 7.3 Hz, 1H), 3.83 (s, 3H), 3.79 – 3.73 (m, 4H), 3.08 (dd,  $J$  = 17.0, 7.3 Hz, 2H).  $^{13}\text{C}$  NMR (126 MHz)  $\delta$  160.17, 159.00, 146.92, 145.32, 134.93, 128.98, 127.32, 127.19, 125.68, 118.86, 114.54, 114.10, 113.38, 64.06, 55.45, 55.37, 43.95.

### 5-(4-chlorophenyl)-3-(4-methoxyphenyl)-1-phenyl-4,5-dihydro-1H-pyrazole (4t)

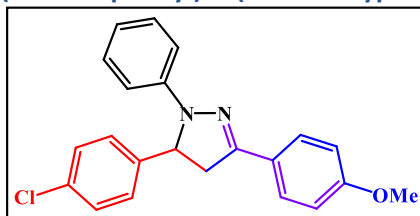

Yield: C1 = 149mg (82%), C2 = 152mg (84%).  $^1\text{NMR}$  (500 MHz)  $\delta$  7.66 – 7.63 (m, 2H), 7.33 – 7.26 (m, 4H), 7.19 – 7.14 (m, 2H), 7.03 – 6.99 (m, 2H), 6.92 – 6.89 (m, 2H), 6.80 – 6.74 (m, 1H), 5.19 (dd,  $J$  = 12.2, 7.2 Hz, 1H), 3.83 (s, 3H), 3.81 – 3.77 (m, 1H), 3.06 (dd,  $J$  = 17.0, 7.3 Hz, 1H).  $^{13}\text{C}$  NMR (126 MHz)  $\delta$  160.28, 146.85, 145.03, 141.32, 133.31, 129.39, 129.03, 127.45, 127.33, 125.35, 119.14, 114.11, 113.32, 63.90, 55.45, 43.78.

### 5-(4-bromophenyl)-3-(4-methoxyphenyl)-1-phenyl-4,5-dihydro-1H-pyrazole (4u)

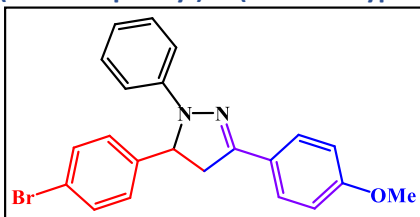

Yield: C1 = 173mg (85%), C2 = 179mg (88%).  $^1\text{NMR}$  (500 MHz)  $\delta$  7.67 – 7.63 (m, 2H), 7.48 – 7.42 (m, 2H), 7.22 – 7.19 (m, 2H), 7.19 – 7.14 (m, 2H), 7.04 – 6.99 (m, 2H), 6.93 – 6.89 (m, 2H), 6.80 – 6.76 (m, 1H), 5.17 (dd,  $J$  = 12.2, 7.2 Hz, 1H), 3.83 (s, 3H), 3.79 (dd,  $J$  = 14.2, 9.4 Hz, 1H), 3.06 (dd,  $J$  = 16.9, 7.2 Hz, 1H).  $^{13}\text{C}$  NMR (126 MHz)  $\delta$  160.30, 146.87, 145.02, 141.86, 132.34, 129.05, 127.81, 127.34, 125.34, 121.41, 119.17, 114.12, 113.33, 63.96, 55.46, 43.73.

### 5-(4-(tert-butyl)phenyl)-3-(4-methoxyphenyl)-1-phenyl-4,5-dihydro-1H-pyrazole (4v)

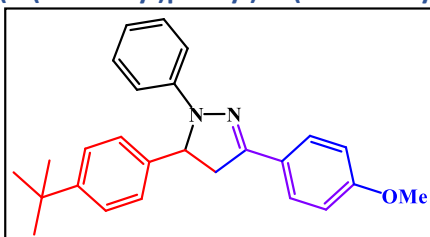

Yield: C1 = 167mg (87%), C2 = 173mg (90%).  $^1\text{NMR}$  (500 MHz)  $\delta$  7.67 – 7.64 (m, 2H), 7.34 – 7.31 (m, 2H), 7.26 – 7.23 (m, 2H), 7.20 – 7.15 (m, 2H), 7.08 – 7.05 (m, 2H), 6.92 – 6.88 (m, 2H), 6.76 (tt,  $J$  = 7.3, 1.1 Hz, 1H), 5.19 (dd,  $J$  = 12.2, 7.3 Hz, 1H), 3.83 (s, 3H), 3.78 (dd,  $J$  = 17.0, 12.2 Hz, 1H), 3.11 (dd,  $J$  = 17.0, 7.3 Hz, 1H), 1.29 (s, 9H).  $^{13}\text{C}$  NMR (126 MHz)  $\delta$  160.13, 150.40, 146.92, 145.36, 139.77, 128.95, 127.29, 126.06, 125.67, 125.62, 118.75, 114.05, 113.28, 64.20, 55.43, 43.88, 34.59, 31.43.

### 3-(4-methoxyphenyl)-1-phenyl-5-(4-(trifluoromethyl)phenyl)-4,5-dihydro-1H-pyrazole (4w)

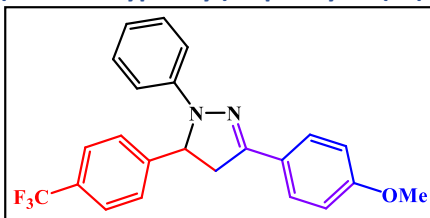

Yield: C1 = 169mg (85%), C2 = 177mg (89%).  $^1\text{NMR}$  (500 MHz)  $\delta$  7.67 – 7.64 (m, 2H), 7.59 (dd,  $J$  = 8.6, 0.5 Hz, 2H), 7.44 (dd,  $J$  = 8.0, 0.4 Hz, 2H), 7.20 – 7.16 (m, 2H), 7.03 – 6.99 (m, 2H), 6.93 – 6.89 (m, 2H), 6.81 – 6.77 (m, 1H), 5.27 (dd,  $J$  = 12.3, 7.2 Hz, 1H), 3.87 – 3.84 (m, 1H), 3.83 (s, 3H), 3.08 (dd,  $J$  = 17.0, 7.2 Hz, 1H).  $^{13}\text{C}$  NMR (126 MHz)  $\delta$  160.37, 146.88, 146.80, 144.95, 130.06, 129.80, 129.27, 129.10, 127.37, 126.42, 126.32, 126.29, 126.25, 126.22, 125.49, 125.20, 123.04, 119.29, 114.14, 113.31, 64.05, 55.44, 43.70.  $^{19}\text{F}$  NMR (471 MHz)  $\delta$  -62.58 (s).

### 5-(benzo[d][1,3]dioxol-5-yl)-3-(4-methoxyphenyl)-1-phenyl-4,5-dihydro-1H-pyrazole (4x)

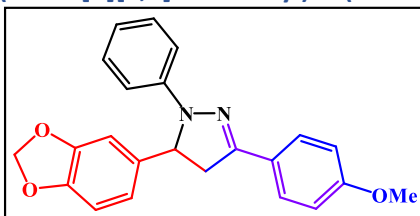

Yield: C1 = 160mg (86%), C2 = 166mg (89%).  $^1\text{NMR}$  (500 MHz)  $\delta$  7.67 – 7.63 (m, 2H), 7.20 – 7.16 (m, 2H), 7.08 – 7.04 (m, 2H), 6.92 – 6.89 (m, 2H), 6.82 – 6.74 (m, 4H), 5.92 – 5.90 (m, 2H), 5.13 (dd,  $J$  = 12.2, 7.2 Hz, 1H), 3.83 (s, 3H), 3.79 – 3.73 (m, 1H), 3.07 (dd,  $J$  = 17.0, 7.2 Hz, 1H).  $^{13}\text{C}$  NMR (126 MHz)  $\delta$  160.18, 148.42, 147.03, 146.86, 145.18, 136.87, 128.97, 127.29, 125.56, 119.21, 118.93, 114.08, 113.32, 108.69, 106.35, 101.19, 64.34, 55.44, 43.92.

### 3,5-bis(4-chlorophenyl)-1-phenyl-4,5-dihydro-1H-pyrazole (4y)

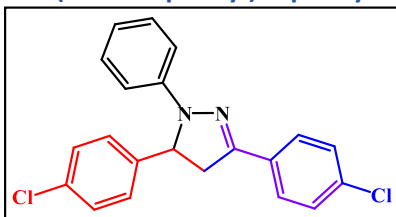

Yield: C1 = 150mg (82%), C2 = 158mg (86%).  $^1\text{NMR}$  (500 MHz)  $\delta$  7.66 – 7.60 (m, 2H), 7.36 – 7.33 (m, 2H), 7.31 – 7.29 (m, 2H), 7.25 – 7.23 (m, 2H), 7.20 – 7.16 (m, 2H), 7.08 – 6.97 (m, 2H), 6.84 – 6.78 (m, 1H), 5.25 (dd,  $J$  = 12.4, 7.2 Hz, 1H), 3.79 (dd,  $J$  = 17.0, 12.4 Hz, 1H), 3.05 (dd,  $J$  = 17.0, 7.2 Hz, 1H).  $^{13}\text{C}$  NMR (126 MHz)  $\delta$  145.64, 144.44, 140.89, 134.52, 133.50, 131.13, 129.49, 129.11, 128.89, 127.38, 126.99, 119.66, 113.49, 64.02, 43.39.

### 5-(4-bromophenyl)-3-(4-chlorophenyl)-1-phenyl-4,5-dihydro-1H-pyrazole (4z)

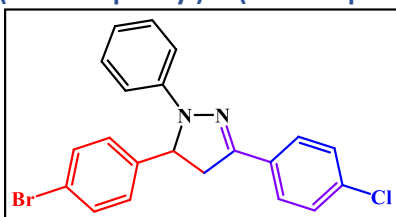

Yield: C1 = 175mg (85%), C2 = 179mg (87%).  $^1\text{NMR}$  (500 MHz)  $\delta$  7.88 – 7.80 (m, 1H), 7.62 (dq,  $J$  = 9.3, 2.4 Hz, 2H), 7.45 (ddd,  $J$  = 6.8, 4.2, 1.9 Hz, 2H), 7.40 – 7.32 (m, 3H), 7.20 – 7.15 (m, 3H), 7.03 – 7.00 (m, 1H), 6.82 – 6.78 (m, 1H), 5.23 (dd,  $J$  = 12.7, 7.3 Hz, 1H), 3.79 (dd,  $J$  = 17.1, 12.4 Hz, 1H), 3.05 (dd,  $J$  = 17.1, 7.3 Hz, 1H).  $^{13}\text{C}$  NMR (126 MHz)  $\delta$  146.83, 146.61, 144.62, 132.46, 129.13, 128.95, 128.70, 126.40, 126.33, 126.29, 125.86, 119.58, 113.43, 64.06, 43.47.

### 5-(4-(tert-butyl)phenyl)-3-(4-chlorophenyl)-1-phenyl-4,5-dihydro-1H-pyrazole (4aa)

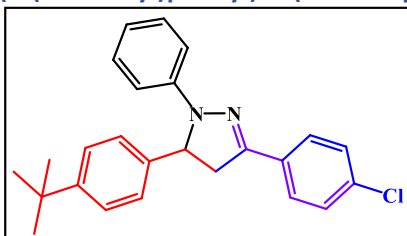

Yield: C1 = 165mg (85%), C2 = 171mg (88%).  $^1\text{NMR}$  (500 MHz)  $\delta$  7.64 – 7.61 (m, 2H), 7.35 – 7.32 (m, 4H), 7.23 – 7.19 (m, 2H), 7.19 – 7.16 (m, 2H), 7.09 – 7.05 (m, 2H), 6.84 – 6.76 (m, 1H), 5.26 (dd,  $J$  = 12.4, 7.1 Hz, 1H), 3.77 (dd,  $J$  = 17.0, 12.4 Hz, 1H), 3.10 (dd,  $J$  = 17.0, 7.2 Hz, 1H), 1.28 (s, 9H).  $^{13}\text{C}$  NMR (126 MHz)  $\delta$  150.59, 145.66, 144.75, 134.26, 129.02, 128.81, 126.95, 126.15, 125.54, 119.27, 113.44, 77.37, 77.11, 76.86, 64.30, 43.47, 34.61, 32.26, 31.41.

### 3-(4-chlorophenyl)-1-phenyl-5-(4-(trifluoromethyl)phenyl)-4,5-dihydro-1H-pyrazole (4ab)

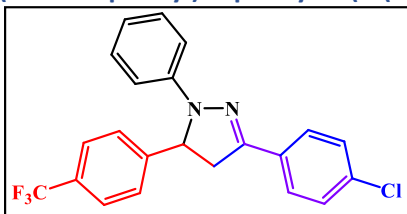

Yield: C1 = 168mg (84%), C2 = 172mg (86%).  $^1\text{NMR}$  (500 MHz)  $\delta$  7.65 – 7.61 (m, 2H), 7.59 (t,  $J$  = 8.7 Hz, 2H), 7.42 (dd,  $J$  = 7.0, 4.2 Hz, 2H), 7.40 – 7.37 (m, 1H), 7.36 – 7.33 (m, 2H), 7.23 – 7.15 (m, 2H), 7.03 – 7.00 (m, 1H), 6.85 – 6.80 (m, 1H), 5.33 (dd,  $J$  = 12.5, 7.2 Hz, 1H), 3.83 (dd,  $J$  = 17.0, 12.5 Hz, 1H), 3.07 (dd,  $J$  = 17.0, 7.2 Hz, 1H).  $^{13}\text{C}$  NMR (126 MHz)  $\delta$  152.19, 146.36, 145.67, 144.36, 139.66, 134.65, 134.09, 130.99, 130.24, 129.98, 129.32, 129.16, 129.00, 128.97, 128.91, 128.15, 127.16,

127.01, 126.36, 125.45, 119.81, 113.48, 105.75, 64.17, 43.31.  $^{19}\text{F}$  NMR (471 MHz)  $\delta$  -62.41 (s), -62.60 (s).

#### 5-(benzo[d][1,3]dioxol-5-yl)-3-(4-chlorophenyl)-1-phenyl-4,5-dihydro-1H-pyrazole (4ac)

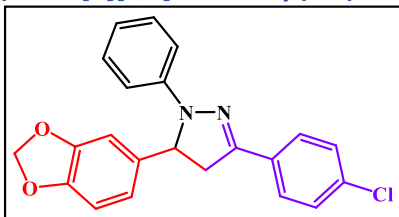

Yield: C1 = 164mg (87%), C2 = 173mg (92%).  $^1\text{NMR}$  (500 MHz)  $\delta$  7.64 – 7.61 (m, 2H), 7.35 – 7.32 (m, 2H), 7.22 – 7.17 (m, 2H), 7.09 – 7.06 (m, 2H), 6.82 – 6.78 (m, 2H), 6.77 – 6.74 (m, 2H), 5.91 (dd,  $J$  = 6.1, 1.4 Hz, 2H), 5.18 (dd,  $J$  = 12.4, 7.2 Hz, 1H), 3.74 (dd,  $J$  = 17.0, 12.4 Hz, 1H), 3.06 (dd,  $J$  = 17.0, 7.2 Hz, 1H).  $^{13}\text{C}$  NMR (126 MHz)  $\delta$  148.50, 147.17, 145.63, 144.60, 136.43, 134.35, 131.34, 129.04, 128.85, 126.96, 119.46, 119.19, 113.51, 108.76, 106.25, 101.25, 64.47, 43.51.

#### 3-(naphthalen-1-yl)-1,5-diphenyl-4,5-dihydro-1H-pyrazole (4ad)

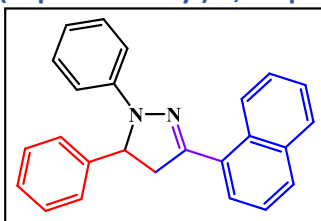

Yield: C1 = 145mg (83%), C1 = 148mg (85%).  $^1\text{NMR}$  (500 MHz)  $\delta$  9.56 (ddd,  $J$  = 8.7, 1.9, 0.8 Hz), 7.90 – 7.87 (m), 7.81 (dd,  $J$  = 7.4, 1.9 Hz), 7.73 – 7.66 (m), 7.56 (ddd,  $J$  = 8.1, 6.8, 1.2 Hz), 7.44 (td,  $J$  = 7.7, 4.7 Hz), 7.39 – 7.35 (m), 7.35 – 7.33 (m), 7.29 – 7.21 (m), 7.18 – 7.11 (m), 6.86 – 6.79 (m), 5.28 (dd,  $J$  = 12.3, 7.1 Hz), 4.05 (dd,  $J$  = 16.7, 12.3 Hz), 3.37 (dd,  $J$  = 16.7, 7.1 Hz).  $^{13}\text{C}$  NMR (126 MHz)  $\delta$  147.35, 144.85, 142.63, 134.30, 130.69, 129.62, 129.27, 129.14, 129.09, 128.69, 127.68, 127.53, 127.41, 126.77, 126.21, 126.03, 124.95, 119.31, 113.55, 63.41, 46.19.

#### 5-(4-methoxyphenyl)-3-(naphthalen-1-yl)-1-phenyl-4,5-dihydro-1H-pyrazole (4ae)

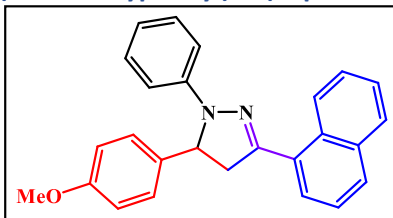

Yield: C1 = 165mg (87%), C2 = 174mg (92%).  $^1\text{NMR}$  (500 MHz)  $\delta$  9.61 (dd,  $J$  = 8.7, 0.8 Hz, 1H), 7.90 (d,  $J$  = 8.2 Hz, 1H), 7.84 – 7.80 (m, 1H), 7.72 (ddd,  $J$  = 8.4, 6.9, 1.4 Hz, 1H), 7.59 (t,  $J$  = 7.5 Hz, 1H), 7.45 – 7.42 (m, 2H), 7.31 – 7.25 (m, 4H), 7.20 – 7.17 (m, 2H), 6.90 – 6.84 (m, 3H), 5.22 (dd,  $J$  = 12.2, 7.0 Hz, 1H), 3.99 (dd,  $J$  = 16.7, 12.2 Hz, 1H), 3.78 (s, 3H), 3.34 (dd,  $J$  = 16.7, 7.0 Hz, 1H).  $^{13}\text{C}$  NMR (126 MHz)  $\delta$  159.10, 147.44, 144.90, 134.69, 134.33, 130.70, 129.61, 128.75, 127.60, 127.45, 127.24, 126.83, 126.24, 125.03, 119.29, 114.63, 113.62, 62.88, 55.37, 46.21.

#### 5-(4-chlorophenyl)-3-(naphthalen-1-yl)-1-phenyl-4,5-dihydro-1H-pyrazole (4af)

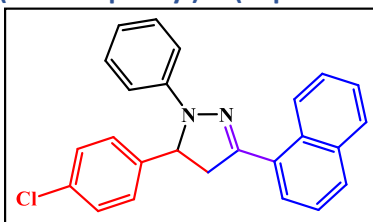



Yield: C1 = 157mg (82%), C2 = 163mg (85%).  $^1\text{NMR}$  (500 MHz)  $\delta$  9.56 – 9.51 (m, 1H), 7.90 – 7.87 (m, 1H), 7.82 (dd,  $J$  = 6.2, 3.1 Hz, 1H), 7.72 – 7.67 (m, 1H), 7.58 – 7.51 (m, 2H), 7.42 (dd,  $J$  = 5.2, 2.2 Hz, 2H), 7.31 (d,  $J$  = 0.5 Hz, 3H), 7.26 – 7.22 (m, 2H), 7.14 – 7.08 (m, 2H), 6.86 – 6.82 (m, 1H), 5.25 (dd,  $J$  = 12.2, 7.0 Hz, 1H), 4.04 (dd,  $J$  = 16.7, 12.2 Hz, 1H), 3.32 (dd,  $J$  = 16.7, 7.0 Hz, 1H).  $^{13}\text{C}$  NMR (126 MHz)  $\delta$  147.37, 144.61, 141.10, 134.29, 133.44, 130.63, 130.14, 129.80, 129.47, 129.18, 128.74, 127.48, 127.43, 126.85, 126.27, 124.95, 119.56, 113.55, 109.12, 62.74, 46.06.

#### 5-(4-bromophenyl)-3-(naphthalen-1-yl)-1-phenyl-4,5-dihydro-1H-pyrazole (4ag)

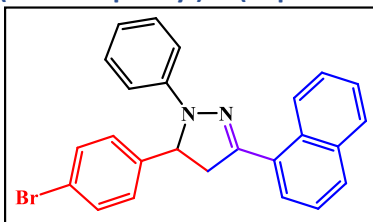

Yield: C1 = 179mg (84%), C2 = 186mg (87%).  $^1\text{NMR}$  (500 MHz)  $\delta$  9.52 (dd,  $J$  = 8.7, 0.9 Hz, 1H), 7.90 – 7.87 (m, 1H), 7.84 – 7.80 (m, 1H), 7.69 (ddd,  $J$  = 8.5, 6.8, 1.4 Hz, 1H), 7.57 (ddd,  $J$  = 8.1, 6.8, 1.2 Hz, 1H), 7.48 – 7.45 (m, 2H), 7.44 – 7.42 (m, 2H), 7.26 – 7.22 (m, 4H), 7.14 – 7.08 (m, 2H), 6.84 (tt,  $J$  = 7.3, 1.1 Hz, 1H), 5.24 (dd,  $J$  = 12.2, 7.0 Hz, 1H), 4.04 (dd,  $J$  = 16.7, 12.3 Hz, 1H), 3.32 (dd,  $J$  = 16.7, 7.0 Hz, 1H).  $^{13}\text{C}$  NMR (126 MHz)  $\delta$  147.37, 144.60, 141.64, 134.30, 132.42, 130.64, 129.81, 129.18, 128.89, 128.74, 127.83, 127.49, 127.42, 126.84, 126.27, 124.94, 121.53, 119.59, 113.56, 62.81, 46.01.

#### 3-(naphthalen-1-yl)-1-phenyl-5-(p-tolyl)-4,5-dihydro-1H-pyrazole (4ah)

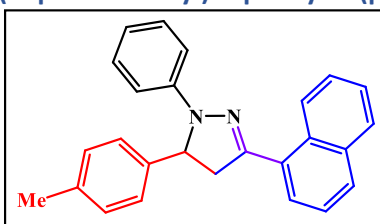

Yield: C1 = 156mg (86%), C2 = 160mg (88%).  $^1\text{NMR}$  (500 MHz)  $\delta$  9.55 (ddd,  $J$  = 8.7, 1.8, 0.8 Hz, 1H), 7.89 – 7.86 (m, 1H), 7.80 (dd,  $J$  = 7.3, 2.0 Hz, 1H), 7.68 (ddd,  $J$  = 8.5, 6.8, 1.4 Hz, 1H), 7.56 (ddd,  $J$  = 8.1, 6.8, 1.2 Hz, 1H), 7.45 – 7.40 (m, 2H), 7.27 – 7.25 (m, 2H), 7.24 – 7.20 (m, 2H), 7.16 – 7.13 (m, 4H), 6.81 (tt,  $J$  = 7.3, 1.2 Hz, 1H), 5.25 (dd,  $J$  = 12.2, 7.1 Hz, 1H), 4.03 (dd,  $J$  = 16.7, 12.2 Hz, 1H), 3.35 (dd,  $J$  = 16.7, 7.1 Hz, 1H), 2.32 (s, 3H).  $^{13}\text{C}$  NMR (126 MHz)  $\delta$  147.36, 144.90, 139.67, 137.34, 134.30, 130.69, 129.91, 129.56, 129.21, 129.07, 128.67, 127.55, 127.38, 126.73, 126.19, 125.95, 124.95, 119.23, 113.54, 63.20, 46.25, 21.19.

#### 5-(4-(tert-butyl)phenyl)-3-(naphthalen-1-yl)-1-phenyl-4,5-dihydro-1H-pyrazole (4ai)

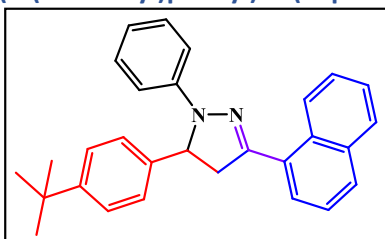

Yield: C1 = 174mg (86%), C2 = 180mg (89%).  $^1\text{NMR}$  (500 MHz)  $\delta$  9.56 (dd,  $J$  = 8.6, 0.9 Hz, 1H), 7.89 – 7.86 (m, 1H), 7.84 – 7.79 (m, 1H), 7.69 (ddd,  $J$  = 8.5, 6.8, 1.4 Hz, 1H), 7.56 (ddd,  $J$  = 8.0, 6.8, 1.1 Hz, 1H), 7.44 – 7.43 (m, 1H), 7.41 – 7.36 (m, 2H), 7.35 – 7.33 (m, 2H), 7.29 (dd,  $J$  = 6.2, 4.2 Hz, 2H), 7.25 – 7.22 (m, 2H), 7.16 (ddd,  $J$  = 3.1, 2.5, 1.5 Hz, 2H), 6.84 – 6.80 (m, 1H), 5.26 (dd,  $J$  = 12.2, 7.0 Hz, 1H), 4.03 (dd,  $J$  = 16.7, 12.2 Hz, 1H), 3.37 (dd,  $J$  = 16.7, 7.0 Hz, 1H), 1.29 (s, 9H).  $^{13}\text{C}$  NMR (126 MHz)  $\delta$  150.51, 147.40, 144.92, 139.52, 134.28, 130.67, 129.56, 129.09, 128.68, 127.55, 127.39, 126.76, 126.19, 126.13, 125.66, 124.95, 119.16, 113.50, 108.90, 63.01, 46.16, 34.60, 31.42.

#### 3-(naphthalen-1-yl)-1-phenyl-5-(4-(trifluoromethyl)phenyl)-4,5-dihydro-1H-pyrazole (4aj)

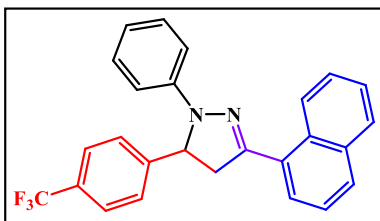

Yield: C1 = 177mg (85%), C2 = 181mg (87%). <sup>1</sup>NMR (500 MHz) δ 9.54 (ddd, J = 8.7, 1.8, 0.8 Hz, 1H), 7.90 – 7.88 (m, 1H), 7.83 (dq, J = 7.2, 3.8 Hz, 1H), 7.70 (ddd, J = 8.5, 6.8, 1.5 Hz, 1H), 7.61 (d, J = 8.1 Hz, 2H), 7.58 (ddd, J = 8.1, 6.8, 1.2 Hz, 1H), 7.49 (d, J = 8.4 Hz, 2H), 7.44 – 7.42 (m, 2H), 7.27 – 7.23 (m, 2H), 7.14 – 7.08 (m, 2H), 6.86 (tt, J = 7.3, 1.1 Hz, 1H), 5.33 (dd, J = 12.3, 7.0 Hz, 1H), 4.11 – 4.04 (m, 1H), 3.34 (dd, J = 16.7, 7.0 Hz, 1H). <sup>13</sup>C NMR (126 MHz) δ 147.38, 146.59, 144.53, 134.31, 130.63, 130.19, 129.91, 129.24, 129.08, 128.77, 127.54, 127.39, 126.89, 126.46, 126.38, 126.36, 126.33, 126.30, 125.48, 124.93, 123.02, 119.71, 113.53, 62.90, 45.97. <sup>19</sup>F NMR (471 MHz) δ -62.40 (s), -62.56 (s).

#### 5-(benzo[d][1,3]dioxol-5-yl)-3-(naphthalen-1-yl)-1-phenyl-4,5-dihydro-1H-pyrazole (4ak)

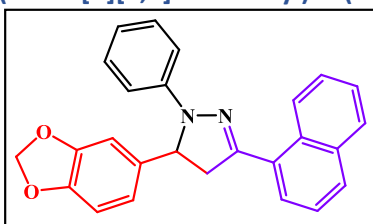

Yield: C1 = 169mg (86%), C2 = 179mg (91%). <sup>1</sup>NMR (500 MHz) δ 9.62 – 9.52 (m, 1H), 7.89 (ddt, J = 8.1, 1.4, 0.5 Hz, 1H), 7.81 (dd, J = 6.4, 2.9 Hz, 1H), 7.73 – 7.68 (m, 1H), 7.57 (ddd, J = 8.1, 6.8, 1.2 Hz, 1H), 7.43 (q, J = 4.0 Hz, 2H), 7.28 – 7.24 (m, 2H), 7.19 – 7.16 (m, 2H), 6.87 – 6.83 (m, 3H), 6.78 (dd, J = 7.9, 0.4 Hz, 1H), 5.92 (dd, J = 4.9, 1.4 Hz, 2H), 5.18 (dd, J = 12.2, 7.0 Hz, 1H), 3.98 (dd, J = 16.7, 12.2 Hz, 1H), 3.33 (dd, J = 16.7, 7.0 Hz, 1H). <sup>13</sup>C NMR (126 MHz) δ 148.50, 147.41, 147.14, 144.78, 136.64, 134.30, 130.66, 129.66, 129.13, 129.08, 128.73, 127.54, 127.46, 126.81, 126.24, 124.98, 119.37, 119.31, 113.57, 108.78, 106.36, 101.22, 63.16, 46.19.

#### 5-(4-methoxyphenyl)-1-phenyl-3-(thiophen-2-yl)-4,5-dihydro-1H-pyrazole (4al)

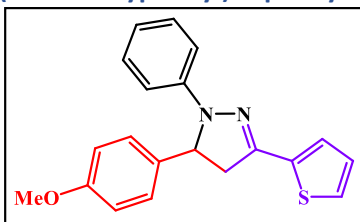

Yield: C1 = 146mg (87%), C2 = 149mg (89%). <sup>1</sup>NMR (500 MHz) δ 7.32 – 7.28 (m, 1H), 7.27 – 7.21 (m, 2H), 7.19 – 7.15 (m, 1H), 7.07 – 6.98 (m, 3H), 6.89 – 6.81 (m, 2H), 6.81 – 6.74 (m, 1H), 5.21 (dd, J = 12.5, 7.3 Hz, 1H), 3.81 (dd, J = 11.2, 5.6 Hz, 1H), 3.77 (s, 3H), 3.10 (dd, J = 16.9, 7.3 Hz, 1H). <sup>13</sup>C NMR (126 MHz) δ 159.09, 144.78, 143.01, 136.81, 134.46, 128.97, 127.43, 127.17, 126.58, 125.96, 119.24, 114.59, 113.57, 64.24, 55.37, 44.48.

#### 5-(4-(tert-butyl)phenyl)-1-phenyl-3-(thiophen-2-yl)-4,5-dihydro-1H-pyrazole (4am)

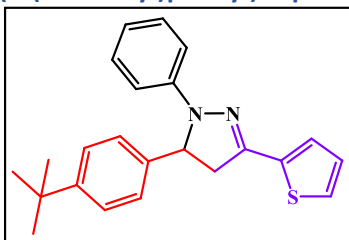

Yield: C1 = 150mg (83%), C2 = 155mg (86%). <sup>1</sup>NMR (500 MHz) δ 7.35 – 7.32 (m, 2H), 7.30 – 7.27 (m, 1H), 7.25 – 7.22 (m, 2H), 7.19 – 7.14 (m, 2H), 7.07 – 6.98 (m, 4H), 6.79 – 6.74 (m, 1H), 5.23 (dd, J = 12.3, 7.2 Hz, 1H), 3.81 (dd, J = 16.9, 12.3 Hz, 1H), 3.13 (dd, J = 16.9, 7.2 Hz, 1H), 1.28 (s, 9H). <sup>13</sup>C NMR

(126 MHz)  $\delta$  150.56, 144.83, 143.01, 139.32, 136.79, 128.95, 127.38, 126.54, 126.12, 125.91, 125.59, 119.13, 113.47, 64.36, 44.41, 31.41, 29.80.

#### 5-(benzo[d][1,3]dioxol-5-yl)-1-phenyl-3-(thiophen-2-yl)-4,5-dihydro-1H-pyrazole (4an)

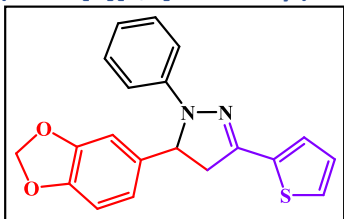

Yield: C1 = 153mg (88%), C2 = 155mg (89%).  $^1\text{NMR}$  (500 MHz)  $\delta$  7.30 (dd,  $J$  = 5.0, 1.3 Hz, 1H), 7.20 – 7.14 (m, 2H), 7.07 – 6.98 (m, 4H), 6.82 – 6.73 (m, 4H), 5.92 (dd,  $J$  = 6.4, 1.5 Hz, 2H), 5.16 (dd,  $J$  = 12.4, 7.3 Hz, 1H), 3.79 (dd,  $J$  = 17.0, 12.2 Hz, 1H), 3.10 (dd,  $J$  = 16.9, 7.3 Hz, 1H).  $^{13}\text{C}$  NMR (126 MHz)  $\delta$  148.48, 147.16, 144.68, 142.97, 136.70, 136.41, 128.98, 127.41, 126.65, 125.97, 119.33, 119.24, 113.54, 108.73, 106.31, 101.23, 64.52, 44.45.

#### 4-methoxybenzaldehyde (2b)

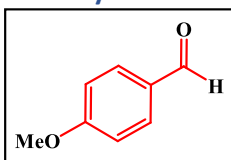

Yield: C1 = 59mg (86%), C2 = 62mg (90%).  $^1\text{NMR}$  (500 MHz)  $\delta$  9.82 (s, 1H), 7.80 – 7.76 (m, 2H), 6.96 – 6.93 (m, 2H), 3.82 (s, 3H).  $^{13}\text{C}$  NMR (126 MHz)  $\delta$  190.85, 164.61, 131.94, 129.87, 114.30, 55.52.

#### (E)-1-(4-methoxybenzylidene)-2-phenylhydrazine (4b)

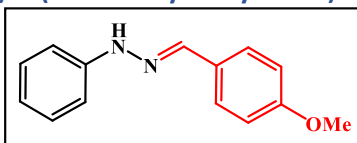

$^1\text{NMR}$  (500 MHz)  $\delta$  7.61 – 7.57 (m, 2H), 7.52 (d,  $J$  = 2.1 Hz, 1H), 7.31 – 7.27 (m, 2H), 7.12 – 7.09 (m, 2H), 6.93 – 6.87 (m, 3H), 3.82 (s, 3H).  $^{13}\text{C}$  NMR (126 MHz)  $\delta$  160.08, 145.12, 137.62, 129.42, 128.29, 127.72, 119.86, 114.24, 112.77, 55.43.

#### (E)-3-(4-methoxyphenyl)-1-(p-tolyl)prop-2-en-1-one (7b)

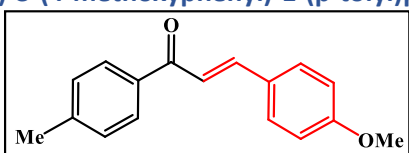

Yield: 111 88%.  $^1\text{NMR}$  (500 MHz)  $\delta$  7.93 – 7.89 (m, 2H), 7.76 (d,  $J$  = 15.6 Hz, 1H), 7.57 – 7.53 (m, 2H), 7.39 (d,  $J$  = 15.6 Hz, 1H), 7.25 (d,  $J$  = 8.0 Hz, 2H), 6.90 – 6.87 (m, 3H), 3.78 (s), 2.38 (s, 3H).  $^{13}\text{C}$  NMR (126 MHz)  $\delta$  189.97, 161.68, 144.27, 143.43, 135.98, 130.26, 129.36, 128.64, 127.78, 119.78, 114.48, 55.43, 21.72.

9.0.  $^1\text{H}$ ,  $^{13}\text{C}$  and  $^{19}\text{F}$  NMR spectra of products.

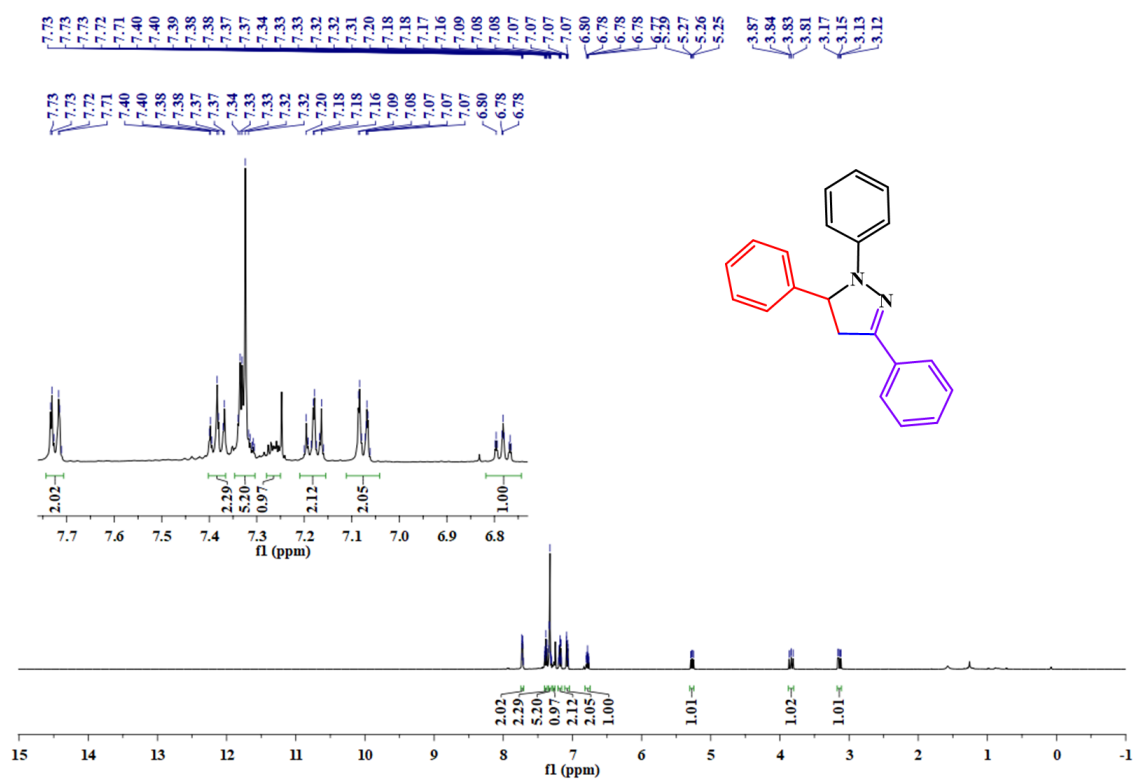

Fig. S26:  $^1\text{H}$  NMR spectrum of **4a** in  $\text{CDCl}_3$  at 500 MHz.

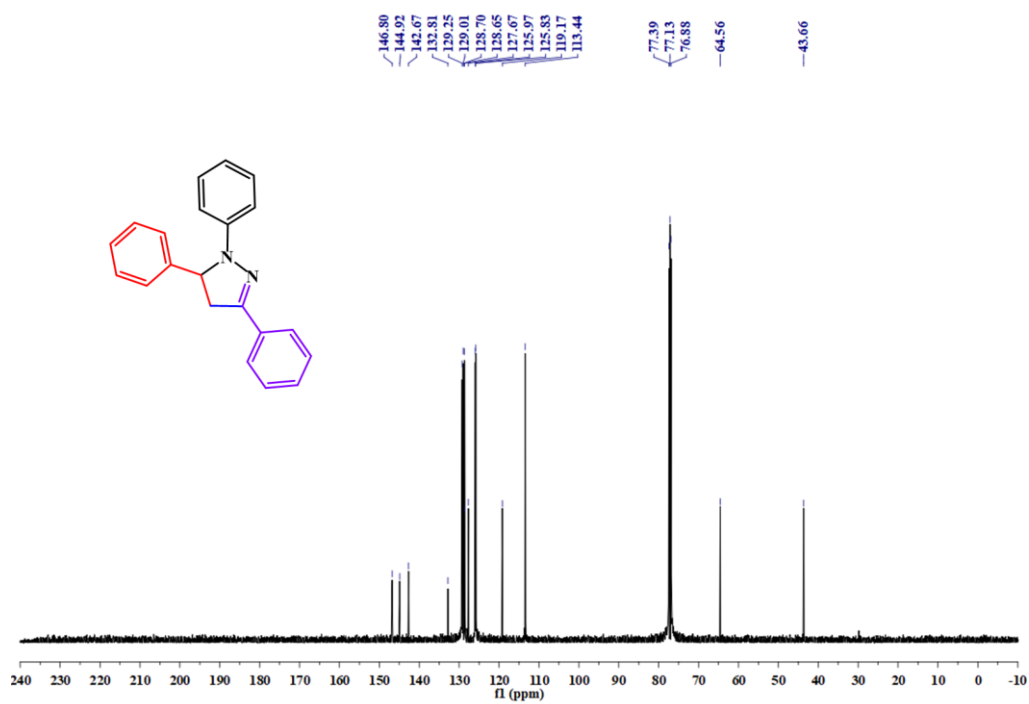

Fig. S27:  $^{13}\text{C}$  NMR spectrum of **4a** in  $\text{CDCl}_3$  at 126 MHz.

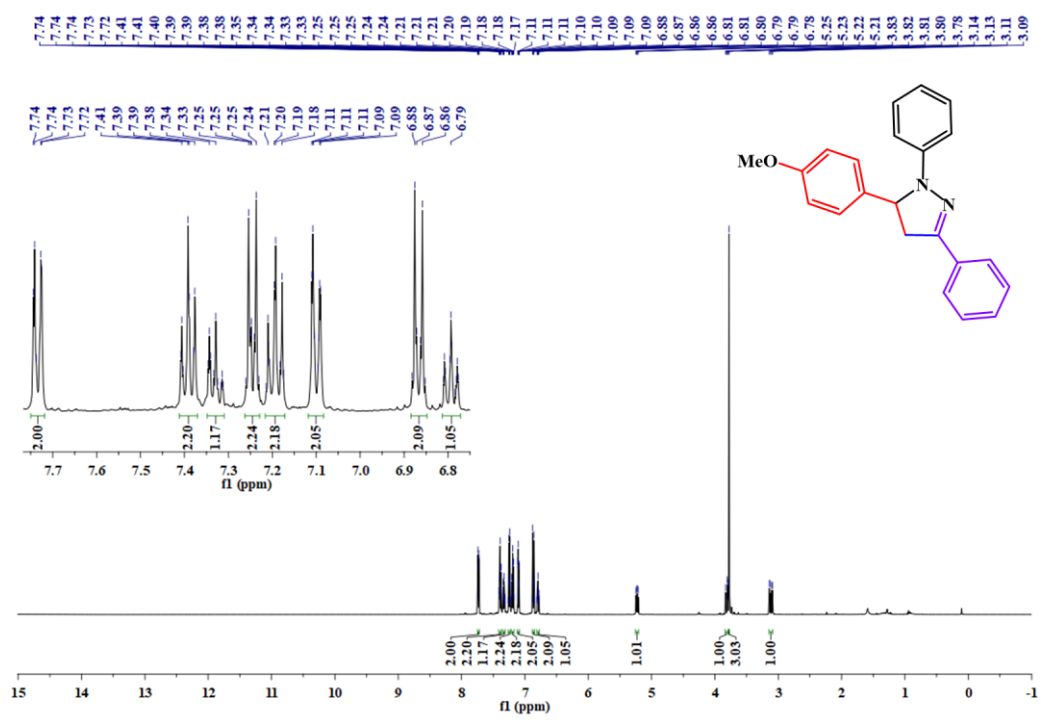

Fig. S28: <sup>1</sup>H NMR spectrum of 4b in CDCl<sub>3</sub> at 500 MHz.

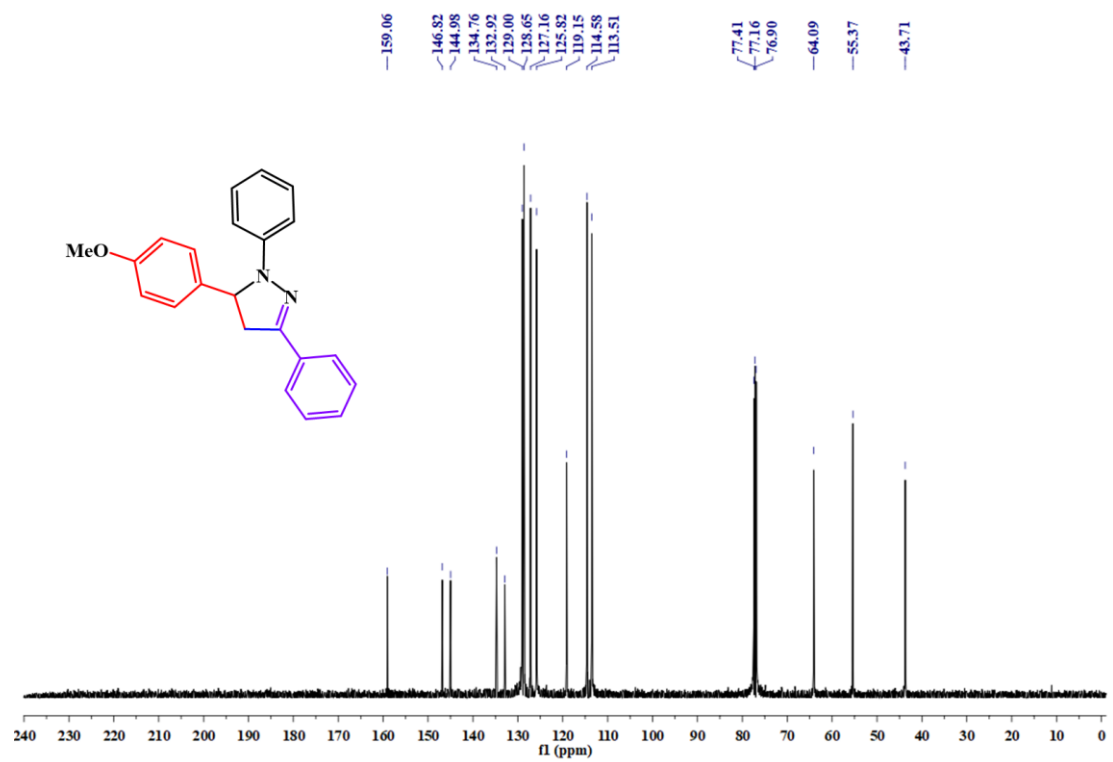

Fig. S29: <sup>13</sup>C NMR spectrum of 4b in CDCl<sub>3</sub> at 126 MHz.

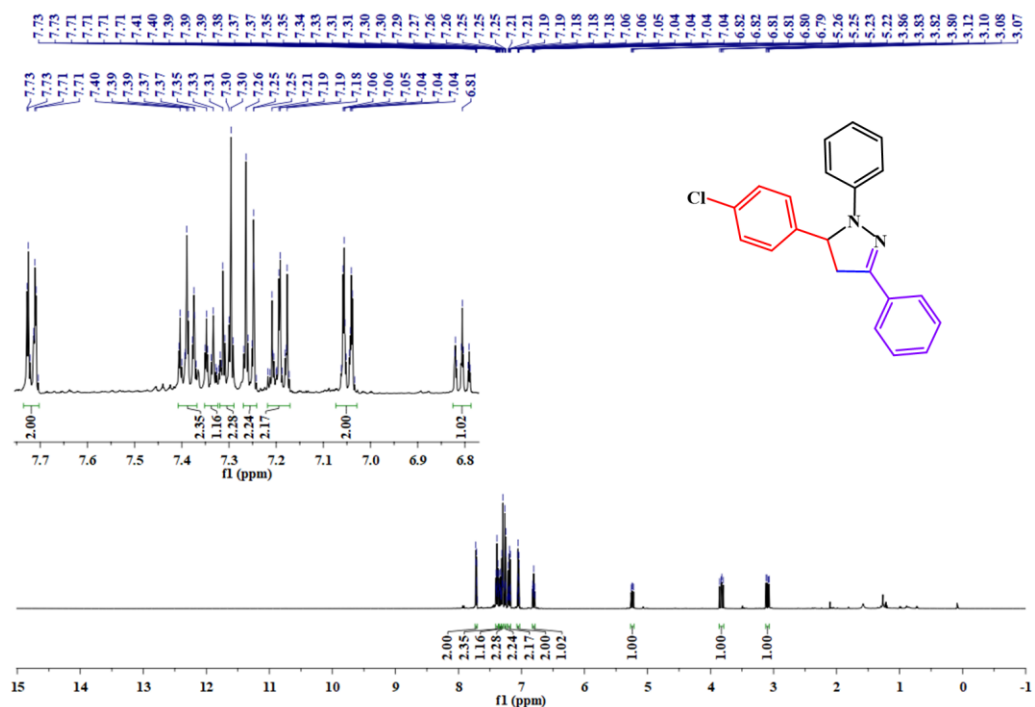

**Fig. S30:** <sup>1</sup>H NMR spectrum of **4c** in CDCl<sub>3</sub> at 500 MHz.

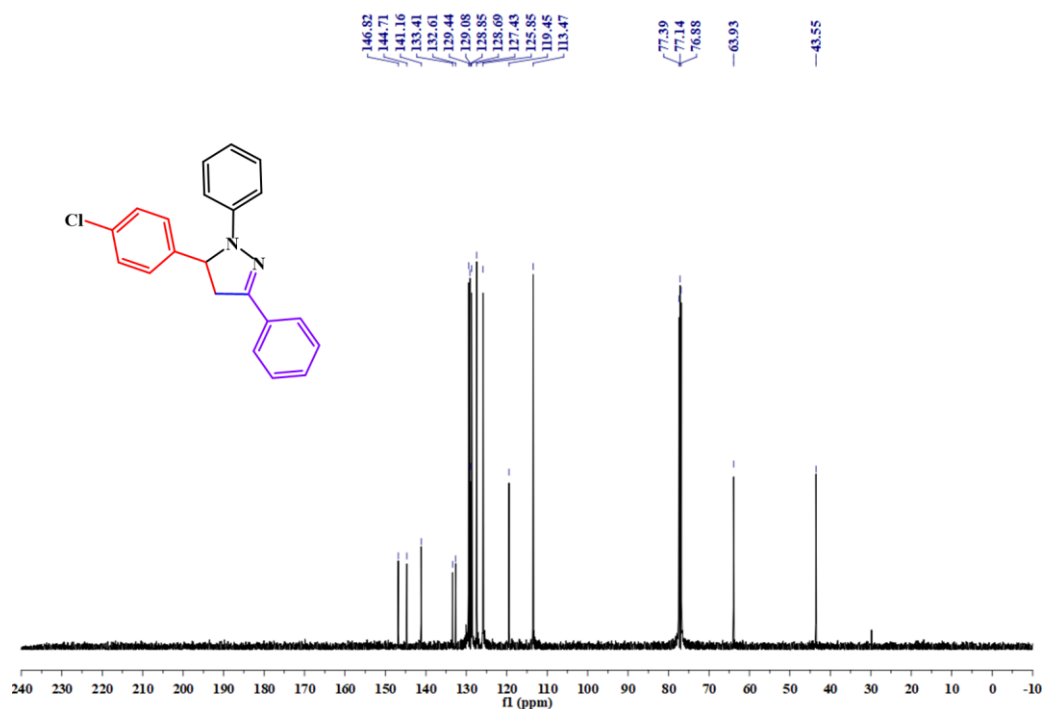

**Fig. S31:** <sup>13</sup>C NMR spectrum of **4c** in CDCl<sub>3</sub> at 126 MHz.

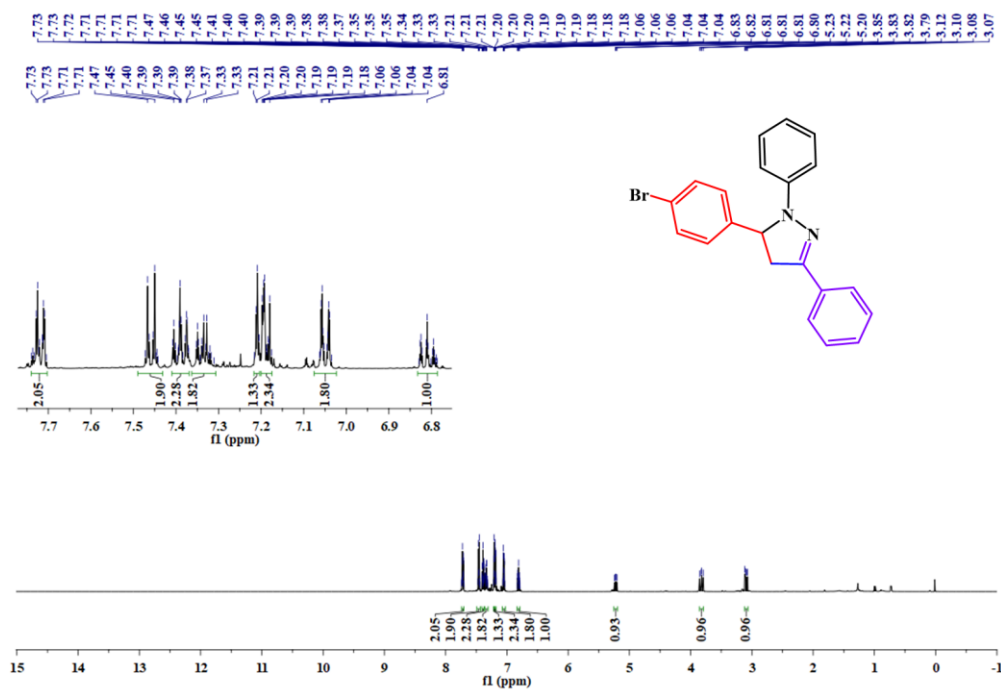

Fig. S32: <sup>1</sup>H NMR spectrum of **4d** in CDCl<sub>3</sub> at 500 MHz.

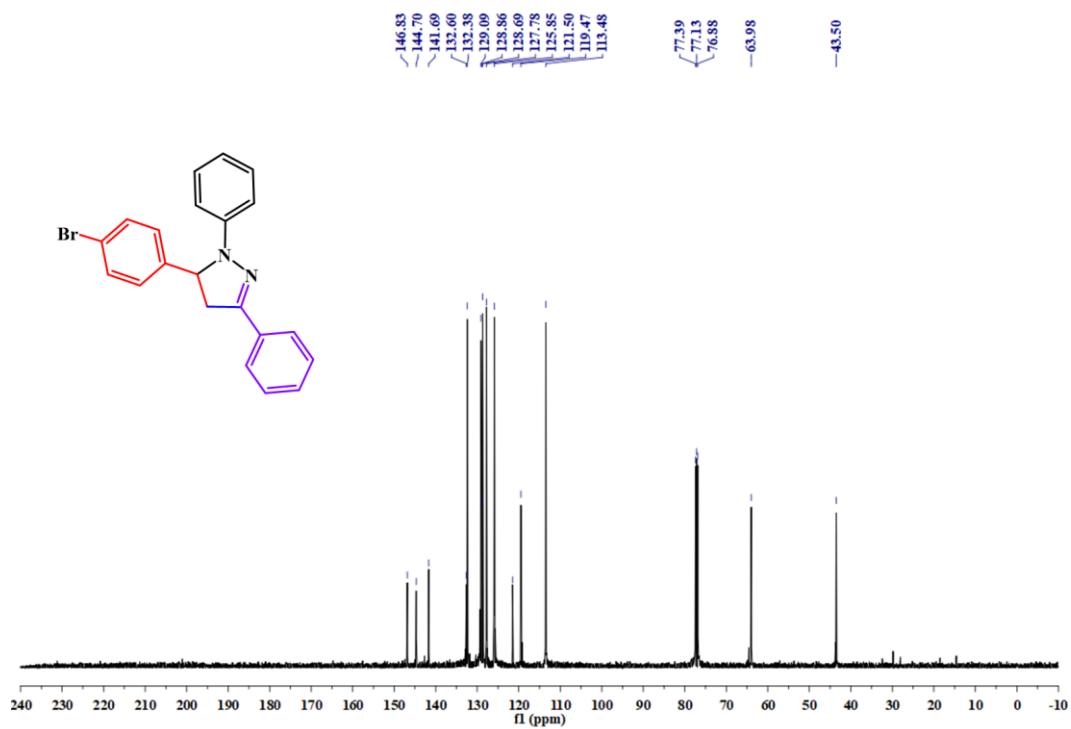

Fig. S33: <sup>13</sup>C NMR spectrum of **4d** in CDCl<sub>3</sub> at 126 MHz.

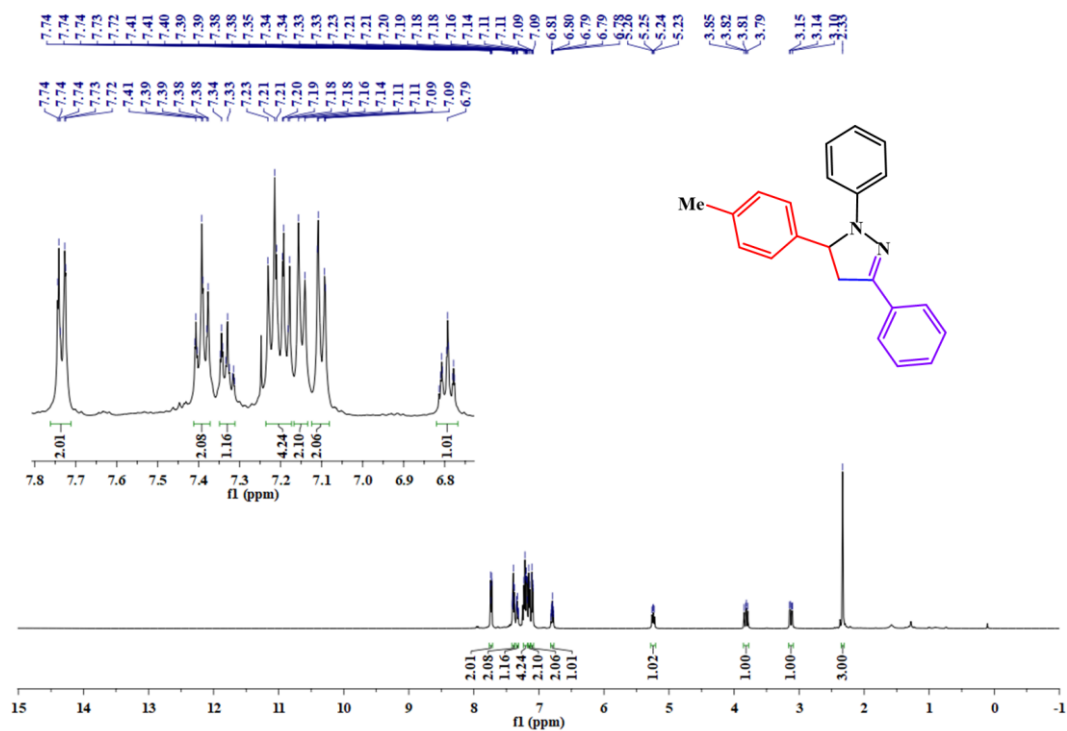

Fig. S34: <sup>1</sup>H NMR spectrum of 4e in CDCl<sub>3</sub> at 500 MHz.

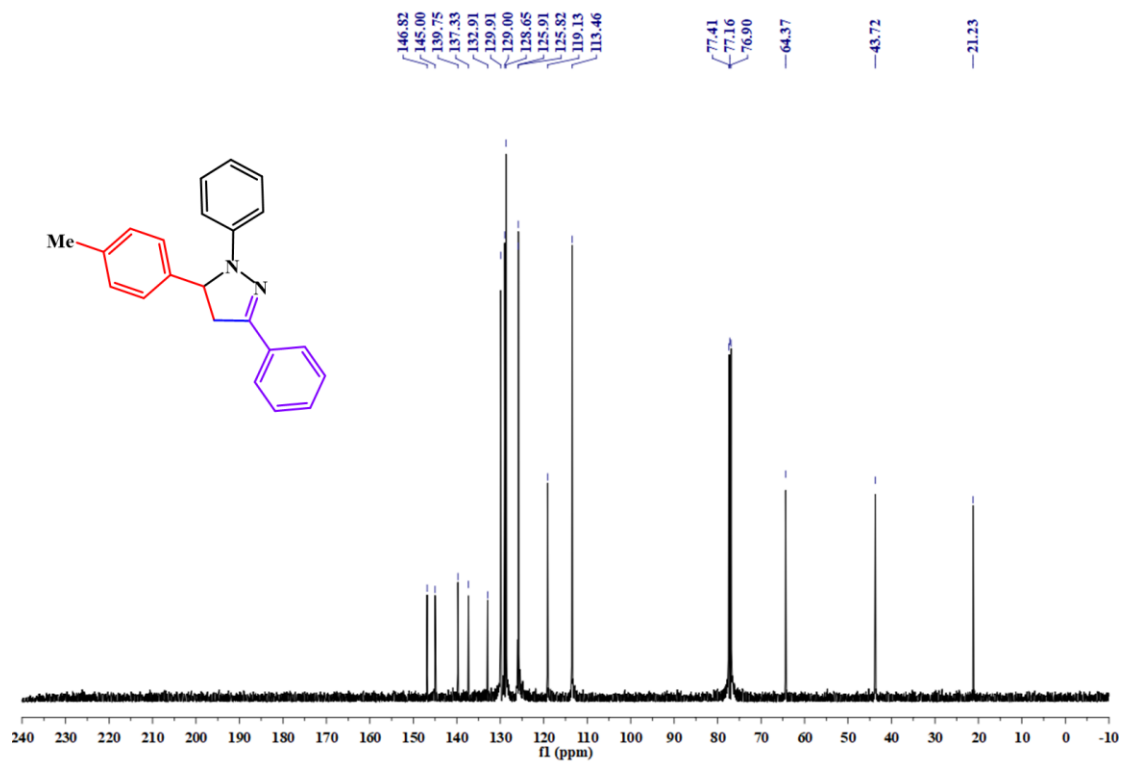

Fig. S35: <sup>13</sup>C NMR spectrum of 4e in CDCl<sub>3</sub> at 126 MHz.



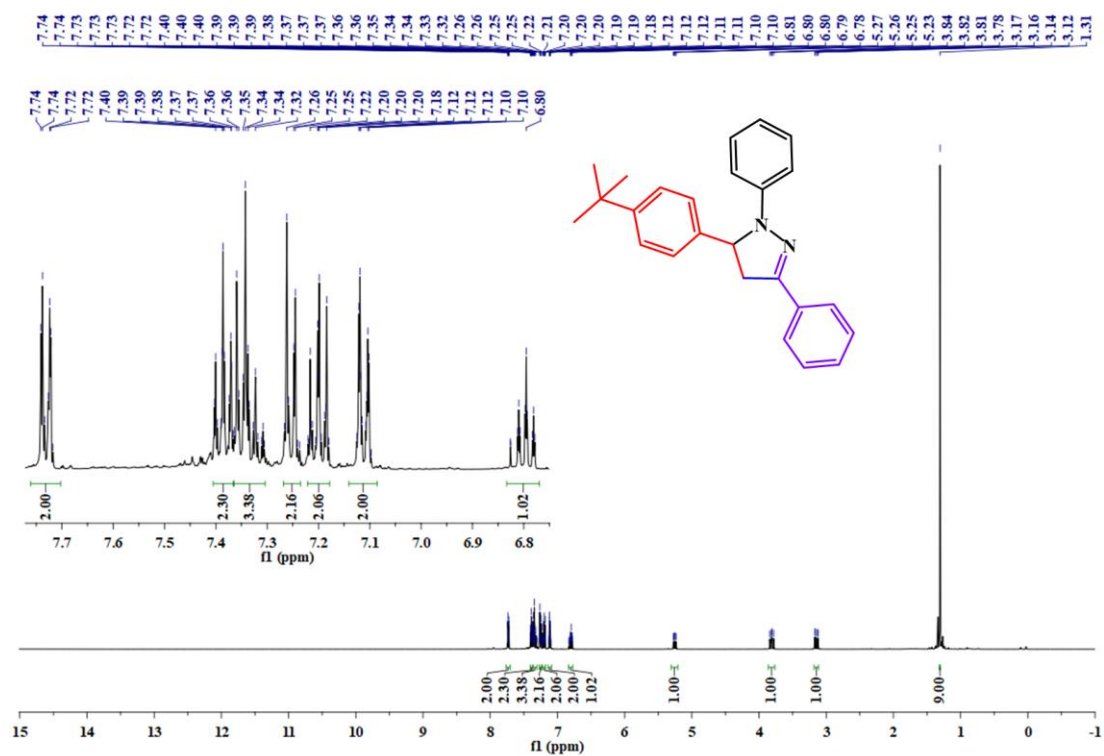

**Fig. S36:** <sup>1</sup>H NMR spectrum of **4f** in CDCl<sub>3</sub> at 500 MHz.

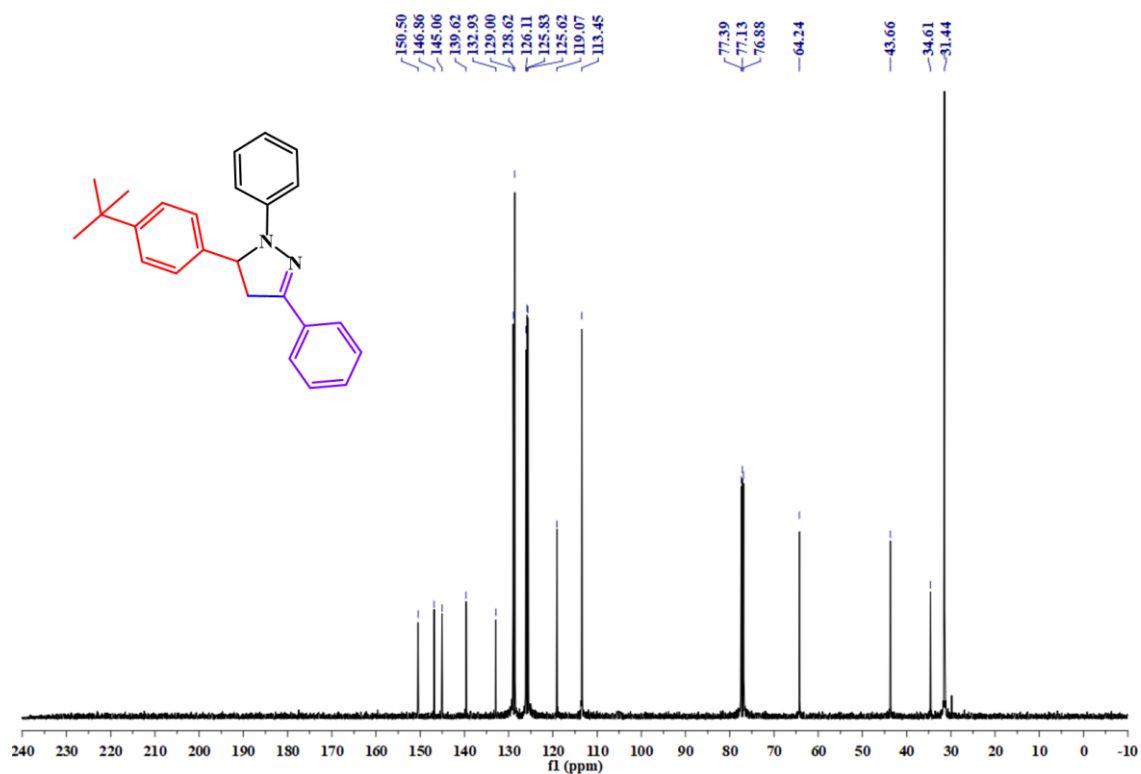

**Fig. S37:** <sup>13</sup>C NMR spectrum of **4f** in CDCl<sub>3</sub> at 126 MHz.

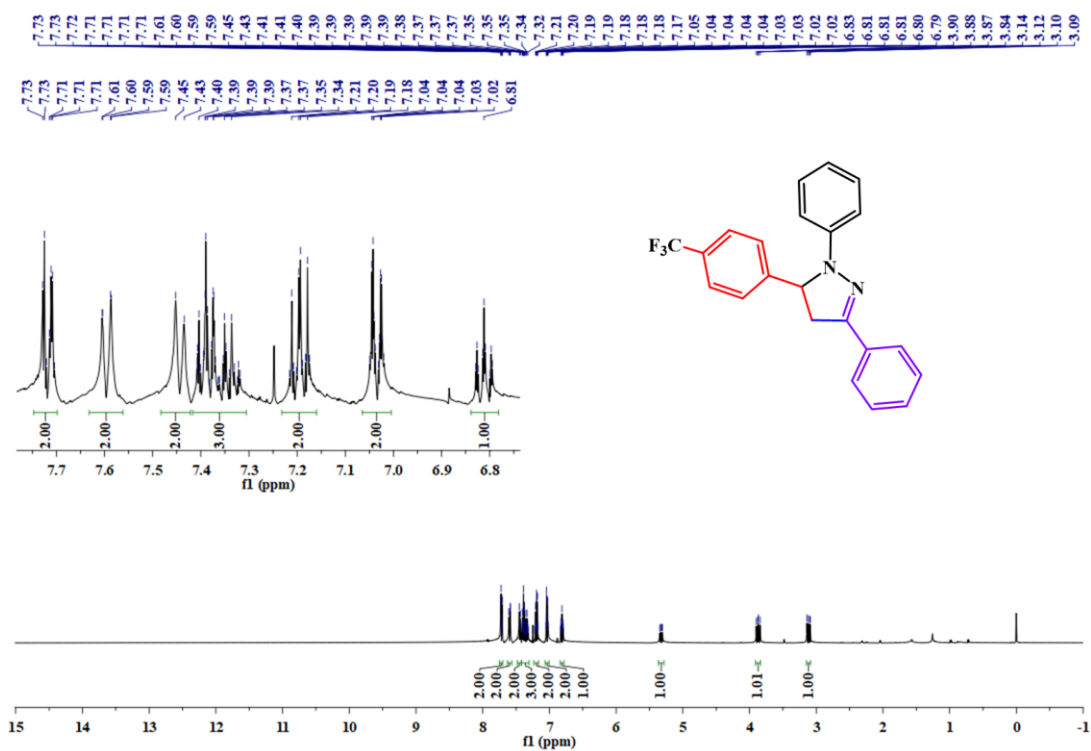

**Fig. S38:** <sup>1</sup>H NMR spectrum of **4g** in CDCl<sub>3</sub> at 500 MHz.

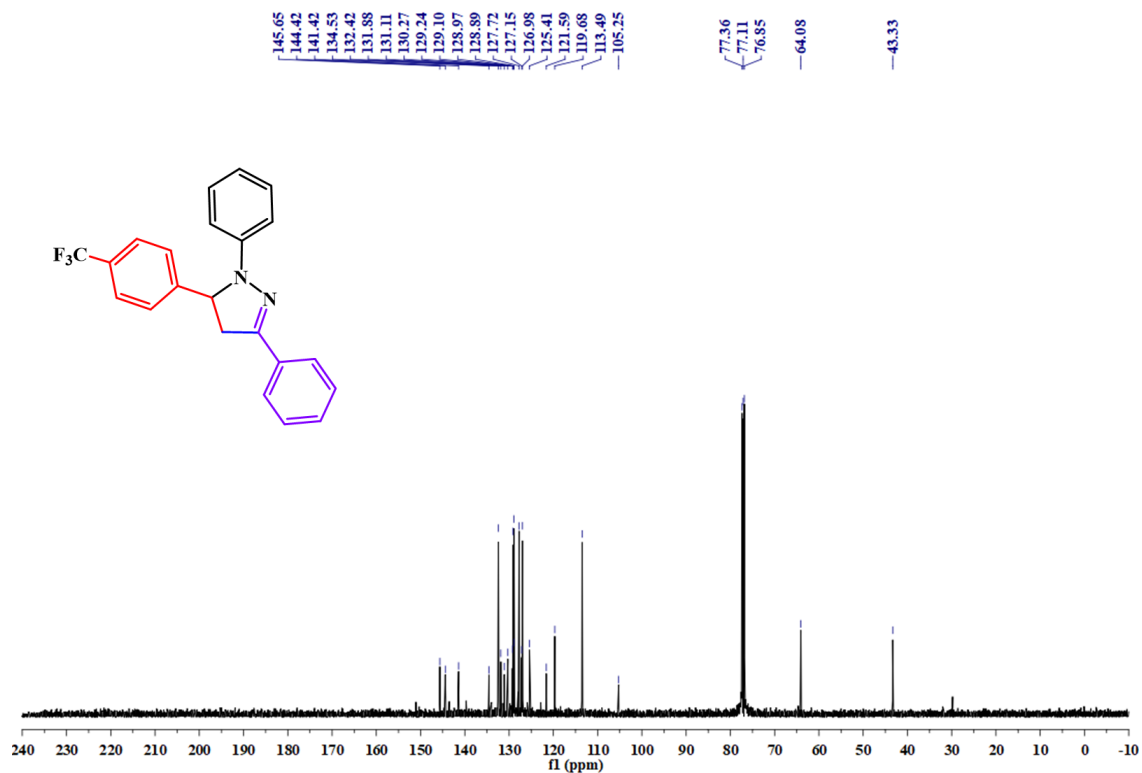

**Fig. S39:** <sup>13</sup>C NMR spectrum of **4g** in CDCl<sub>3</sub> at 126 MHz.

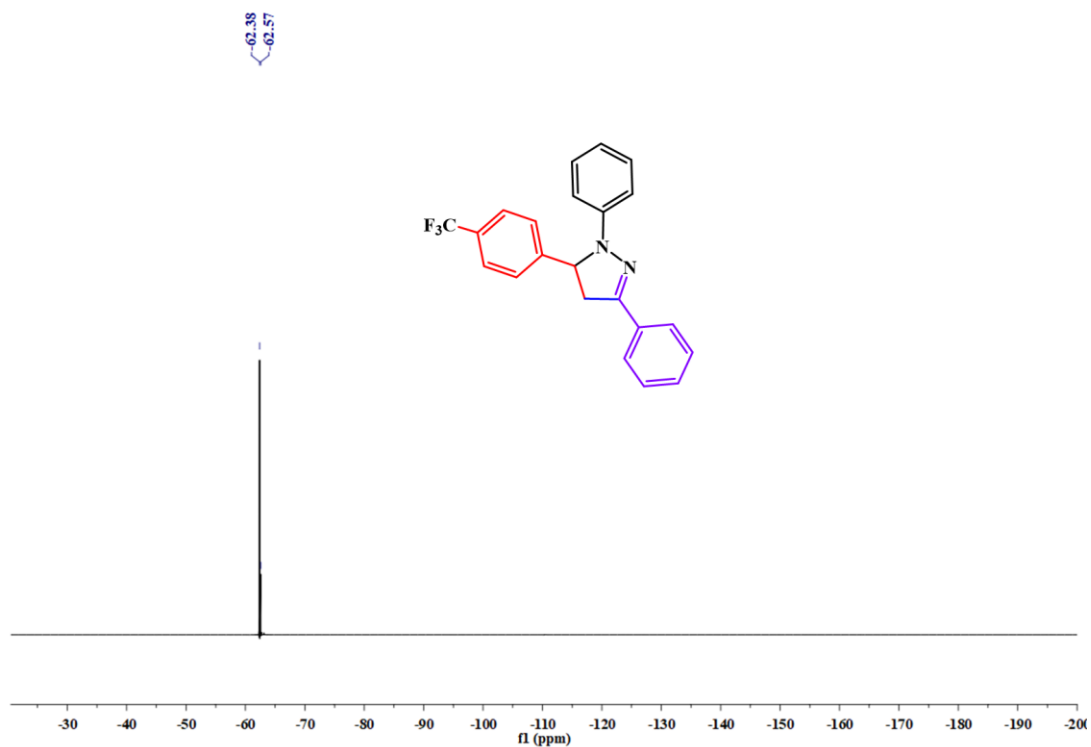

Fig. S40:  $^{19}\text{F}$  NMR spectrum of 4g in  $\text{CDCl}_3$  at 471 MHz.

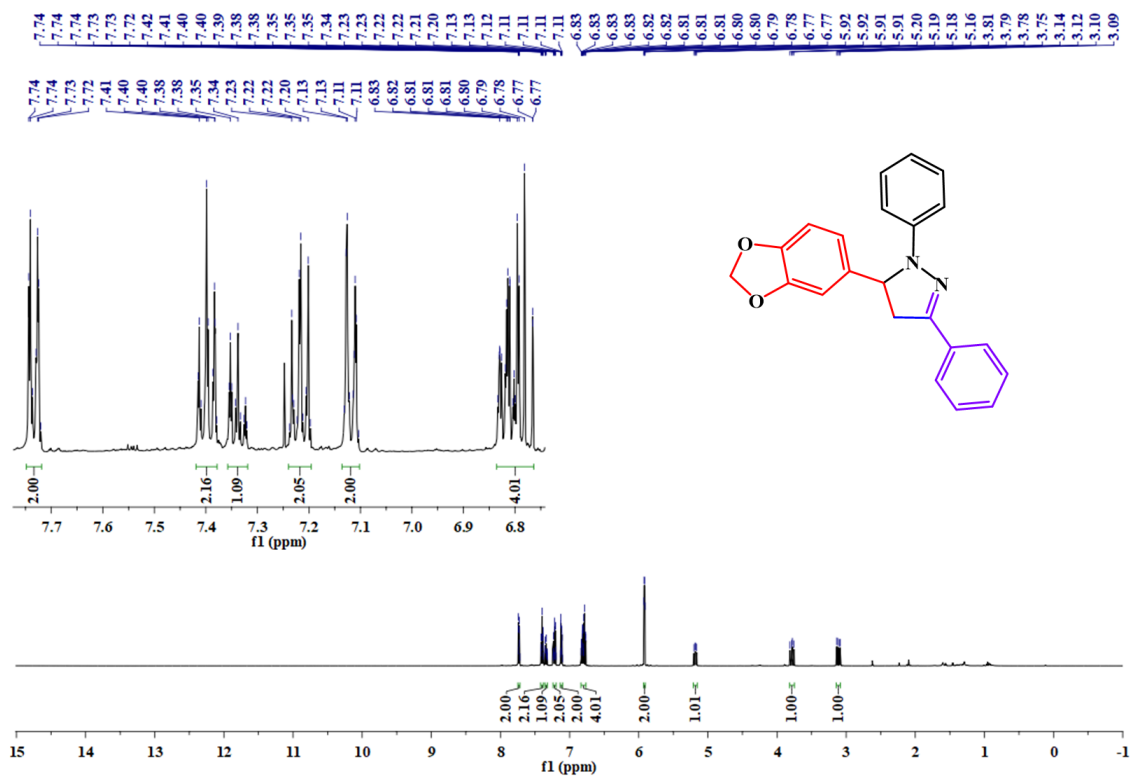

Fig. S41:  $^1\text{H}$  NMR spectrum of 4h in  $\text{CDCl}_3$  at 500 MHz.

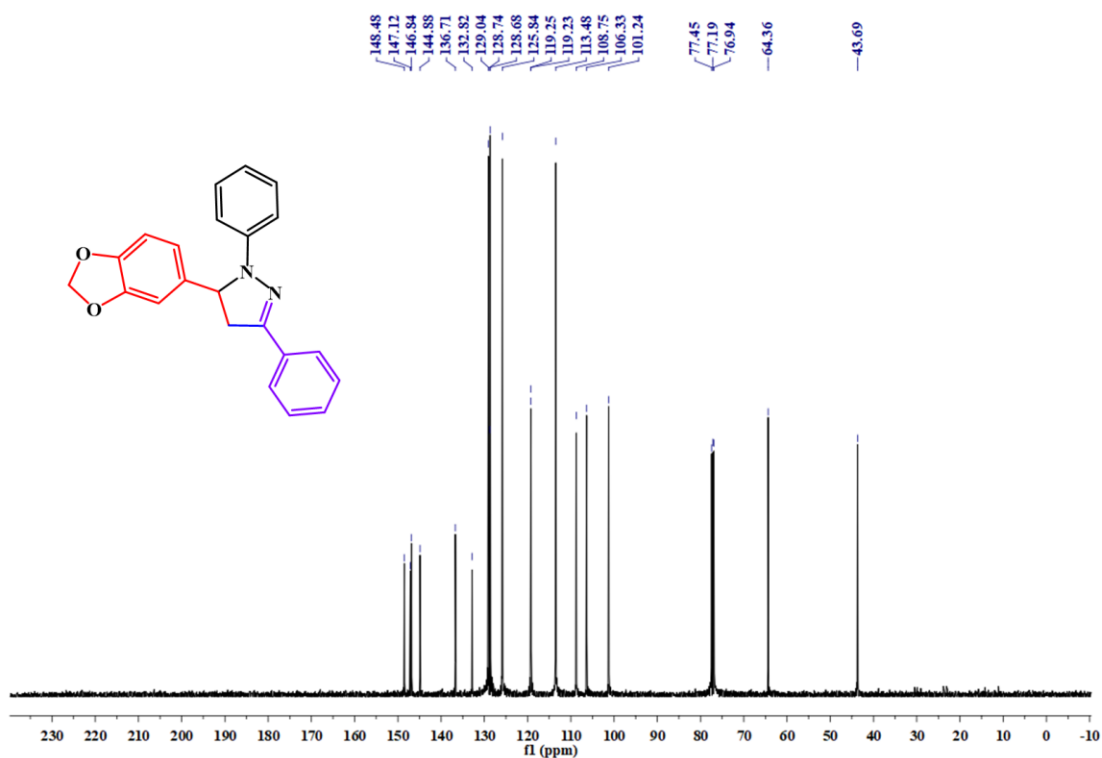

Fig. S42:  $^{13}\text{C}$  NMR spectrum of **4h** in  $\text{CDCl}_3$  at 126 MHz.

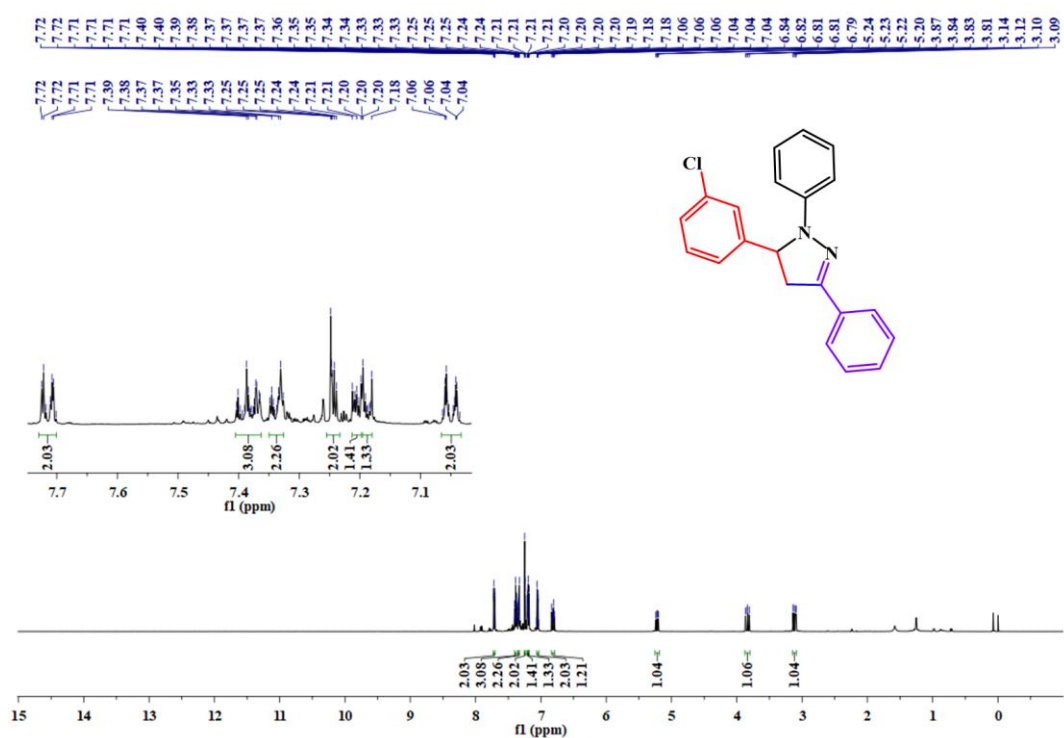

Fig. S43:  $^1\text{H}$  NMR spectrum of **4i** in  $\text{CDCl}_3$  at 500 MHz.

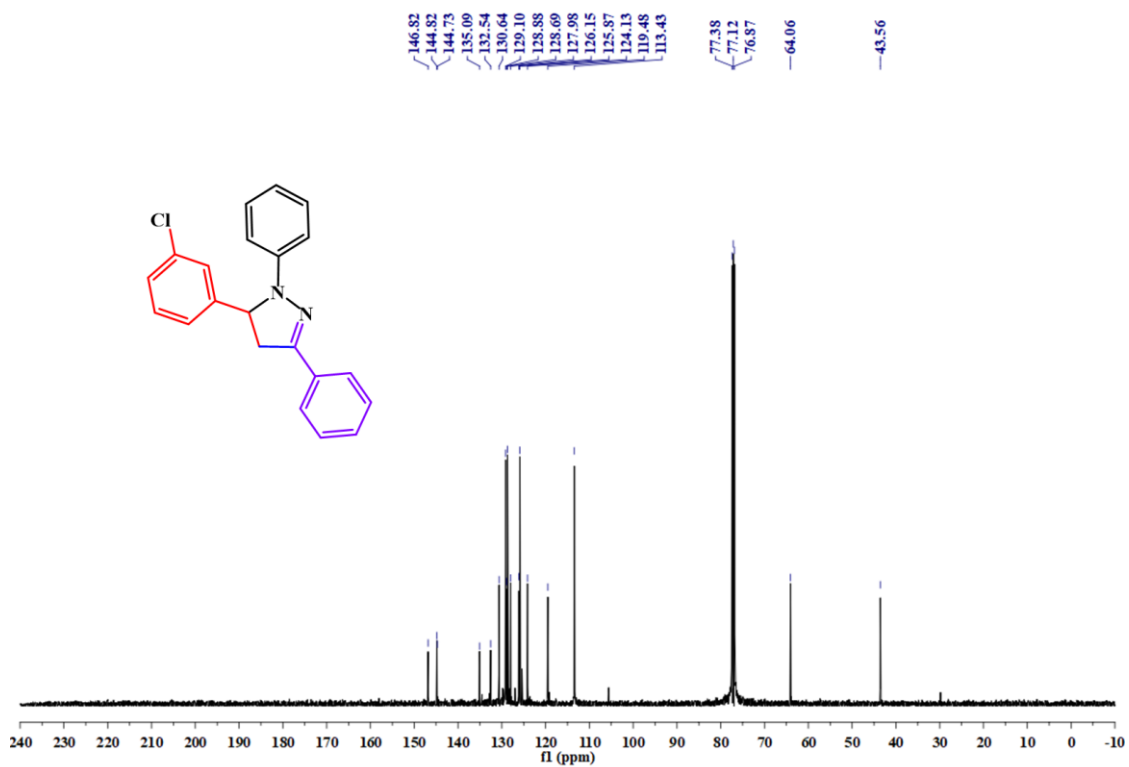

Fig. S44: <sup>13</sup>C NMR spectrum of 4i in CDCl<sub>3</sub> at 126 MHz.

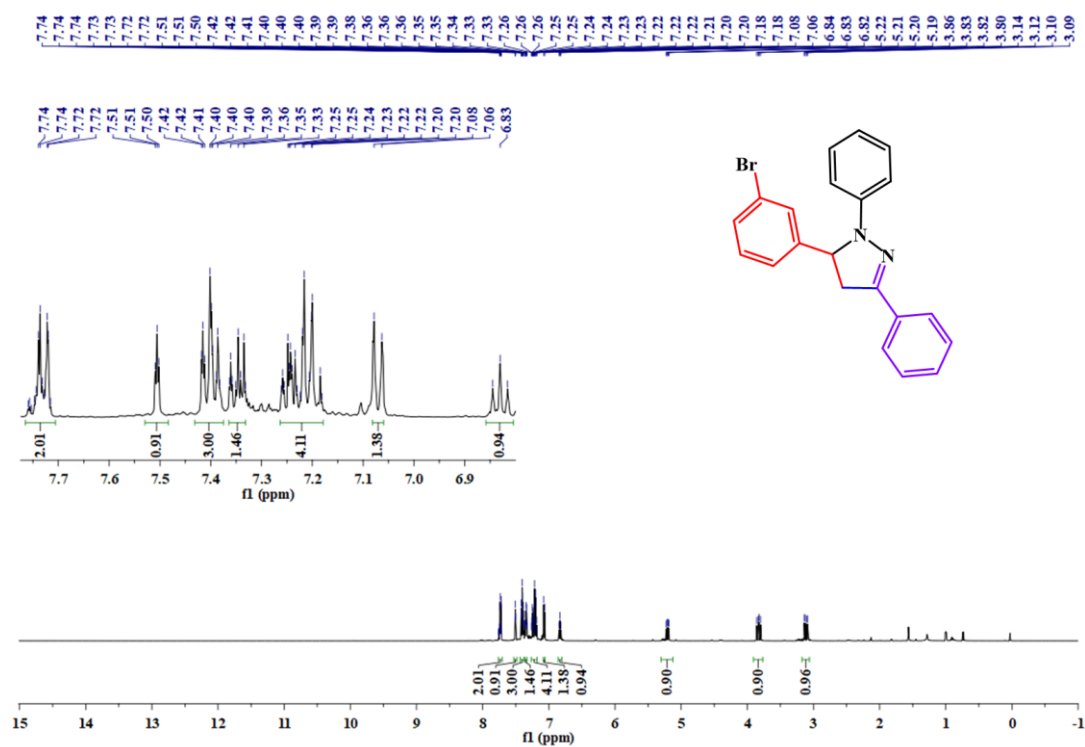

Fig. S45: <sup>1</sup>H NMR spectrum of 4j in CDCl<sub>3</sub> at 500 MHz.

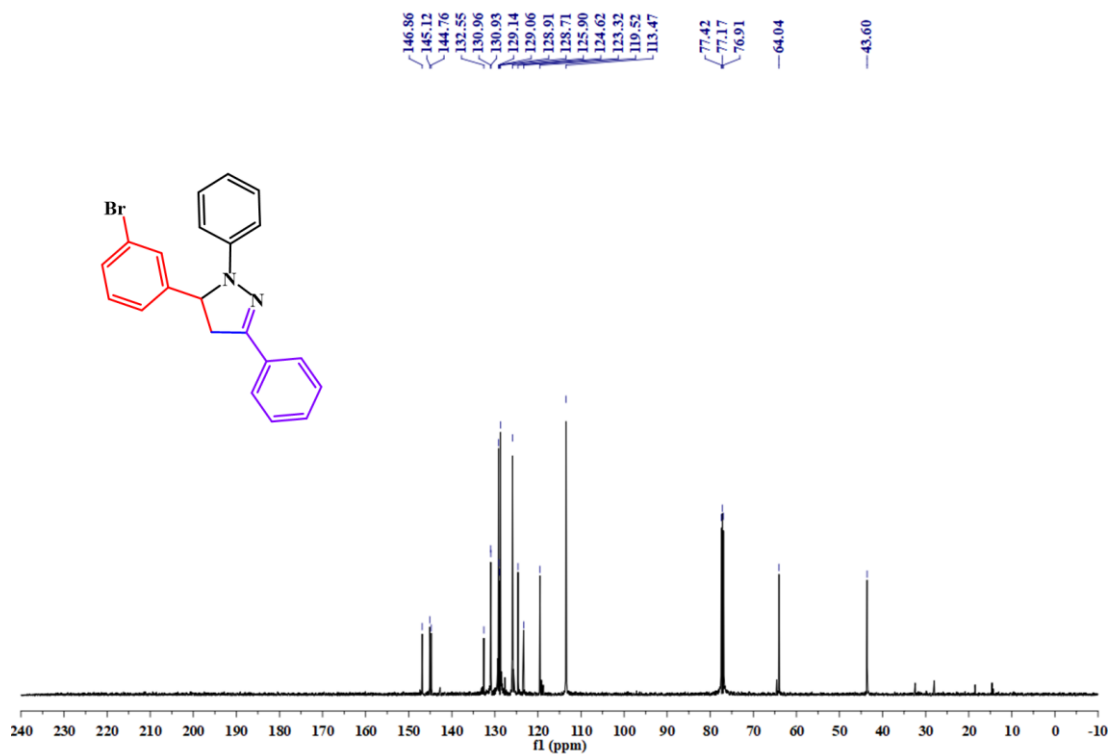

**Fig. S46:**  $^{13}\text{C}$  NMR spectrum of **4j** in  $\text{CDCl}_3$  at 126 MHz.

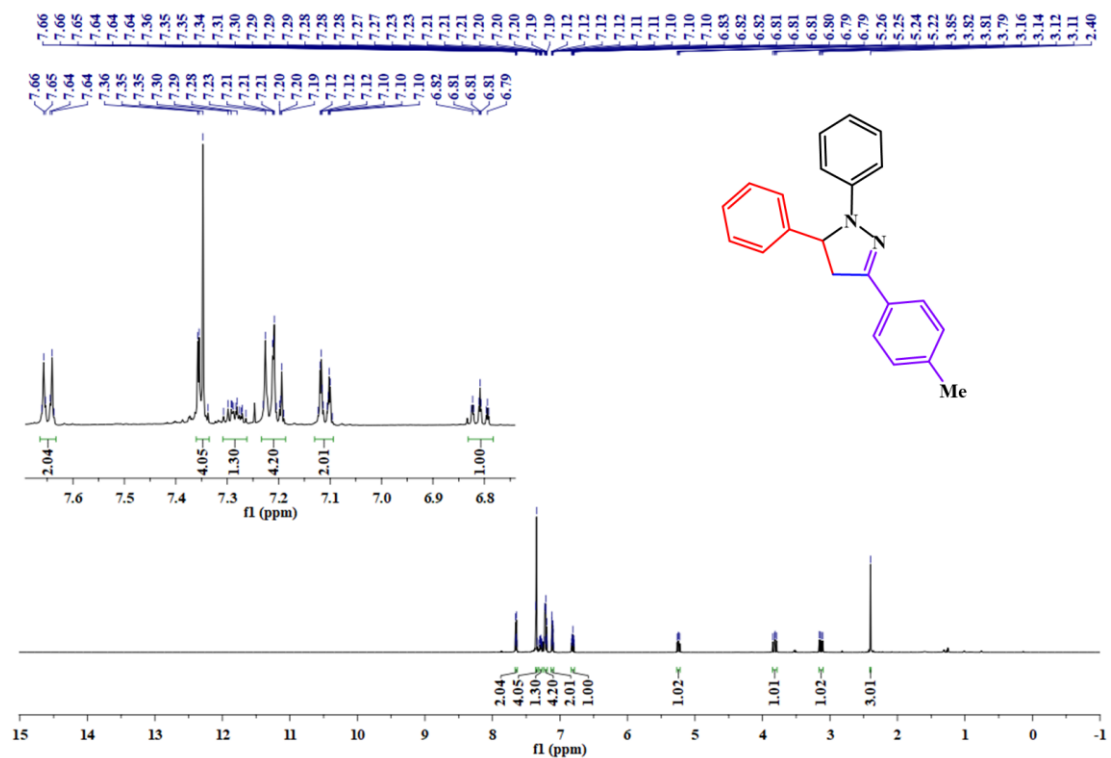

**Fig. S47:**  $^1\text{H}$  NMR spectrum of **4k** in  $\text{CDCl}_3$  at 500 MHz.

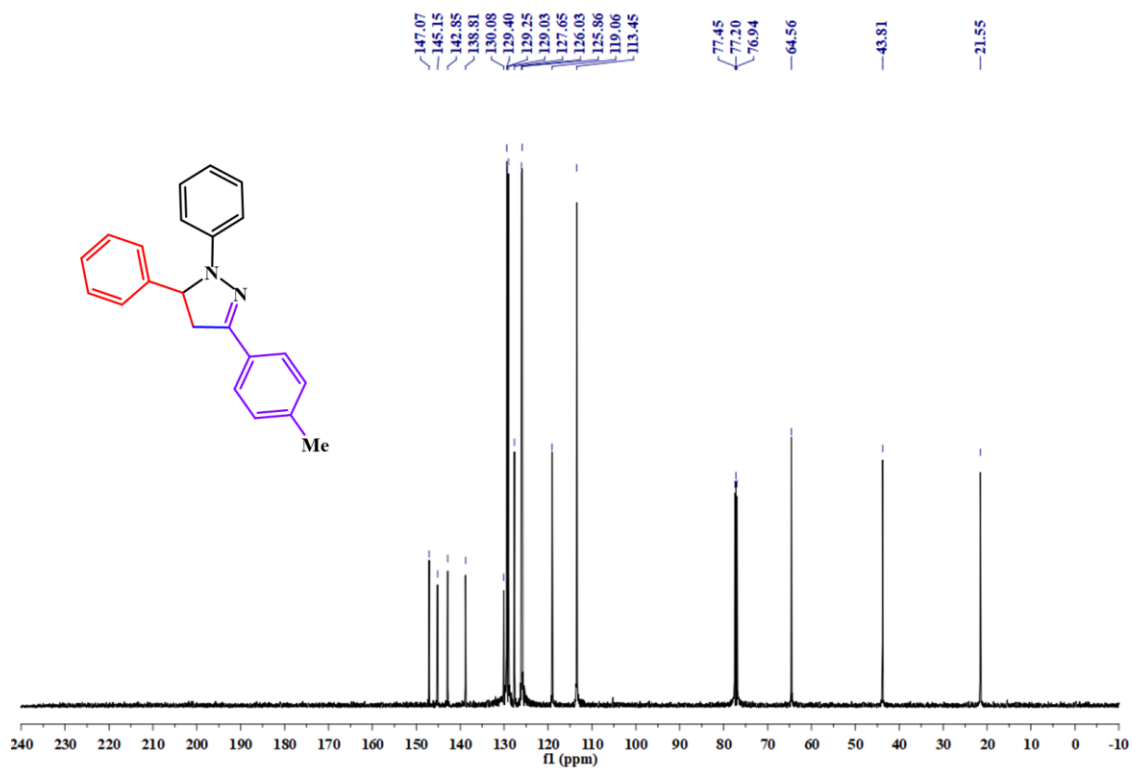

Fig. S48:  $^{13}\text{C}$  NMR spectrum of **4k** in  $\text{CDCl}_3$  at 126 MHz.

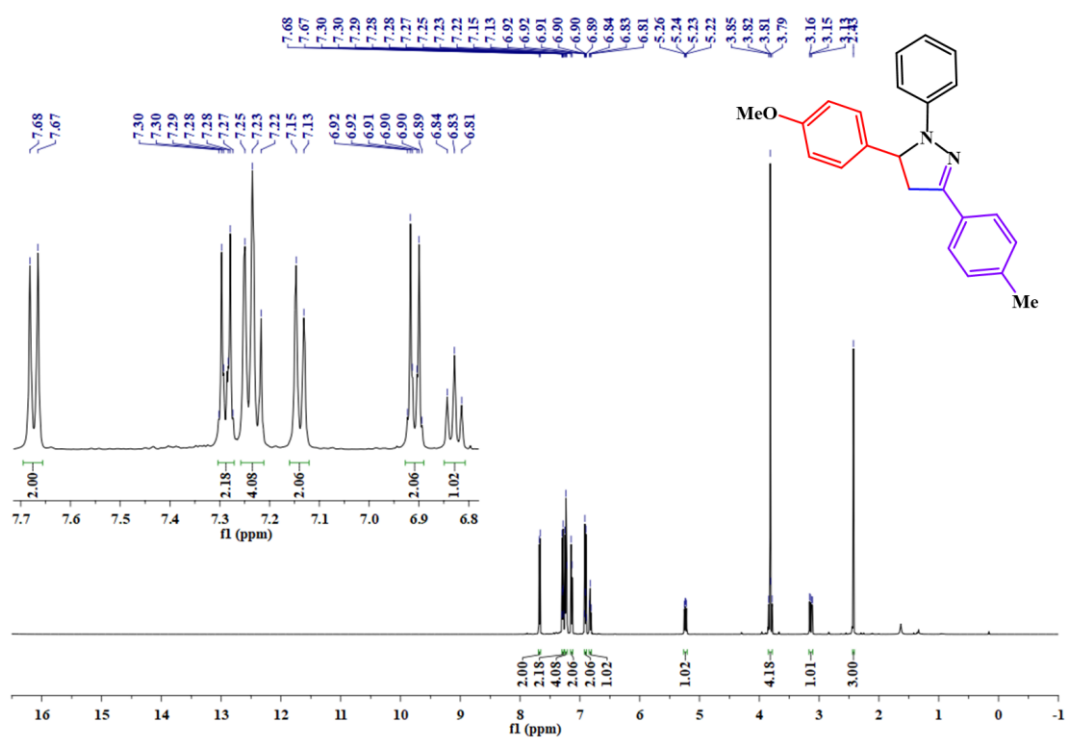

Fig. S49:  $^1\text{H}$  NMR spectrum of **4l** in  $\text{CDCl}_3$  at 500 MHz.

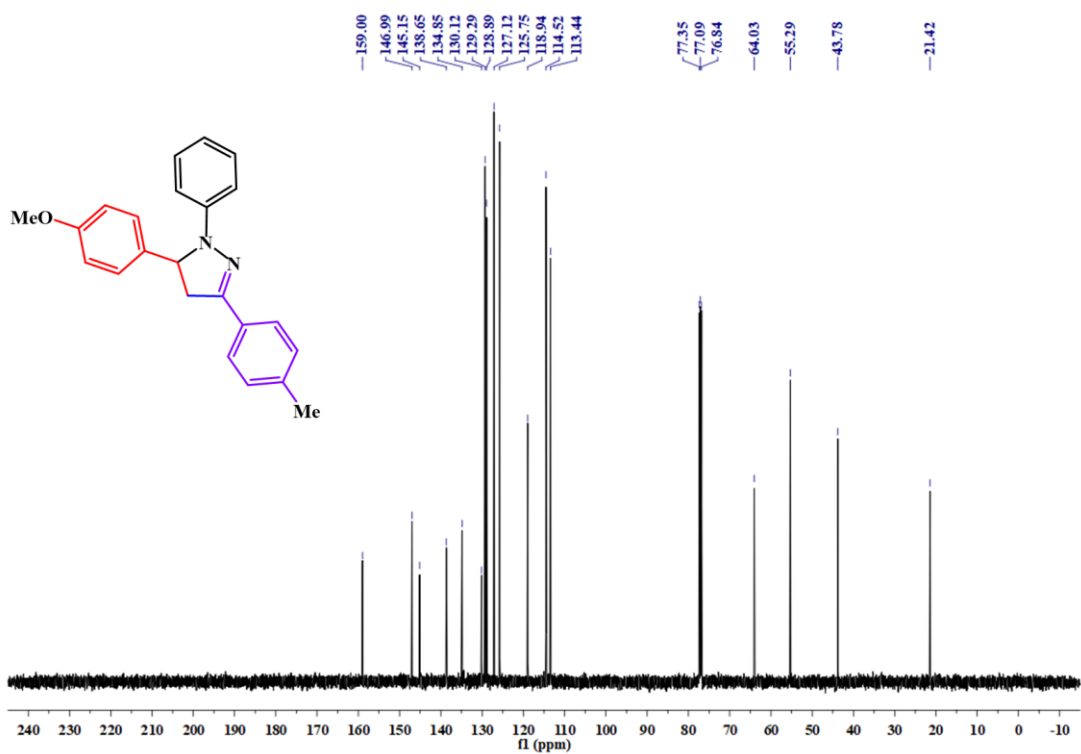

Fig. S50:  $^{13}\text{C}$  NMR spectrum of **4l** in  $\text{CDCl}_3$  at 126 MHz.

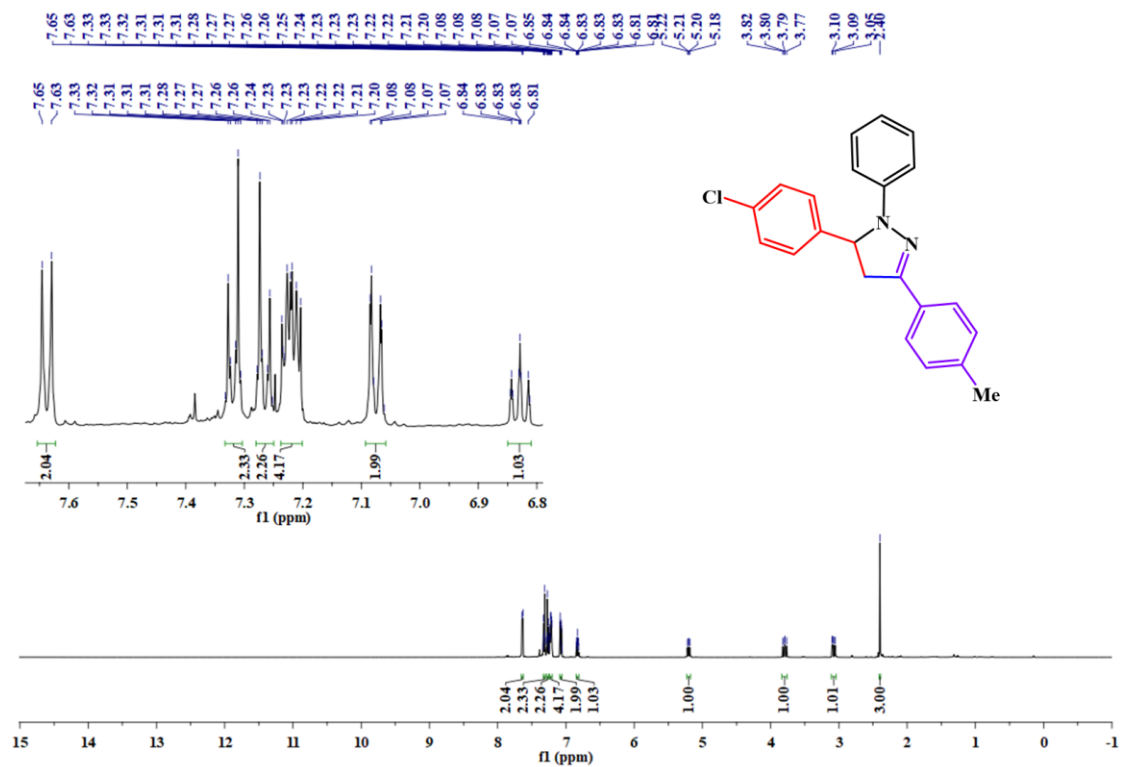

Fig. S51:  $^1\text{H}$  NMR spectrum of **4m** in  $\text{CDCl}_3$  at 500 MHz.



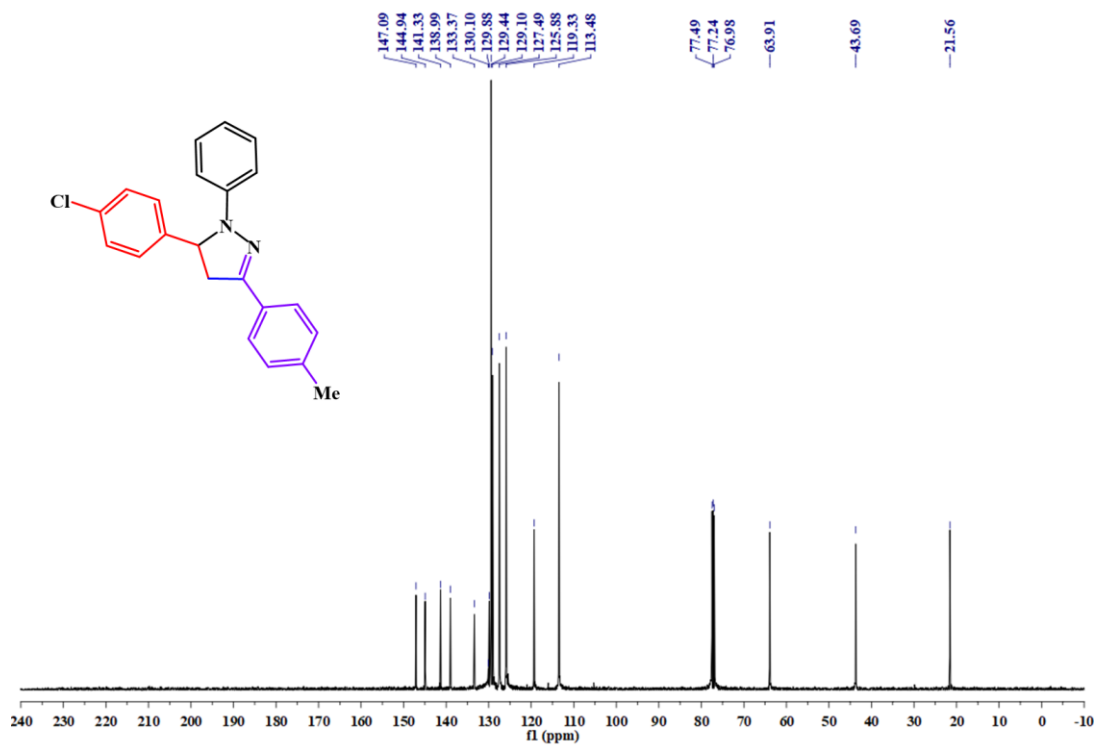

Fig. S52:  $^{13}\text{C}$  NMR spectrum of **4m** in  $\text{CDCl}_3$  at 126 MHz.

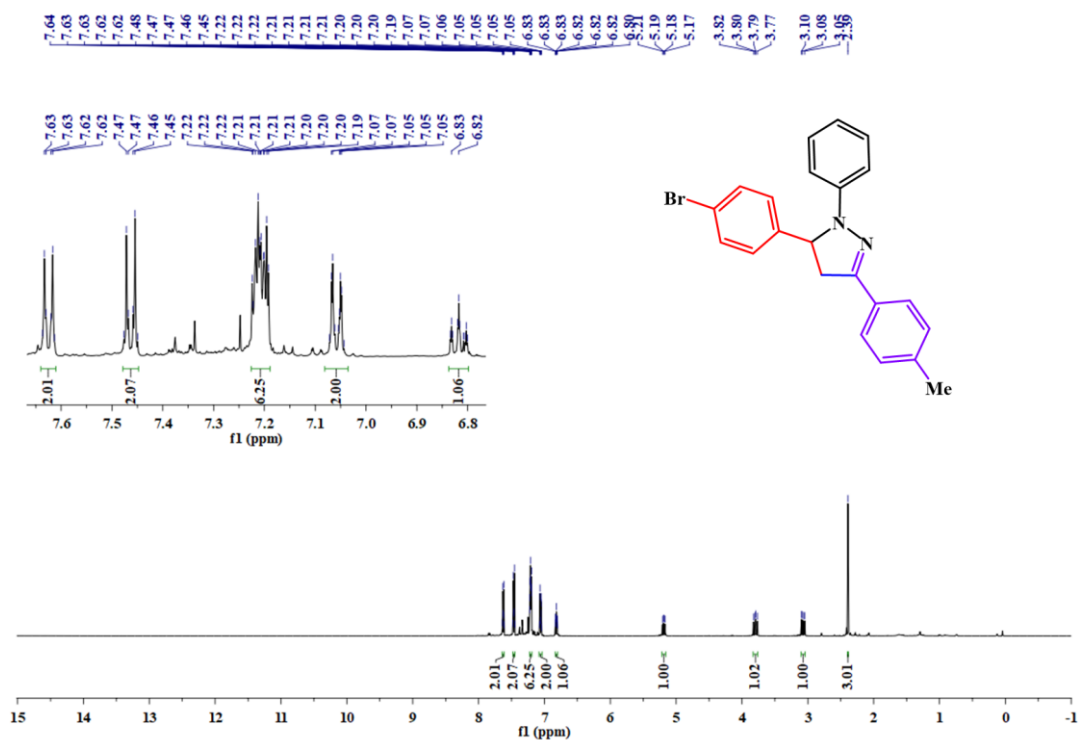

Fig. S53:  $^1\text{H}$  NMR spectrum of **4n** in  $\text{CDCl}_3$  at 500 MHz.

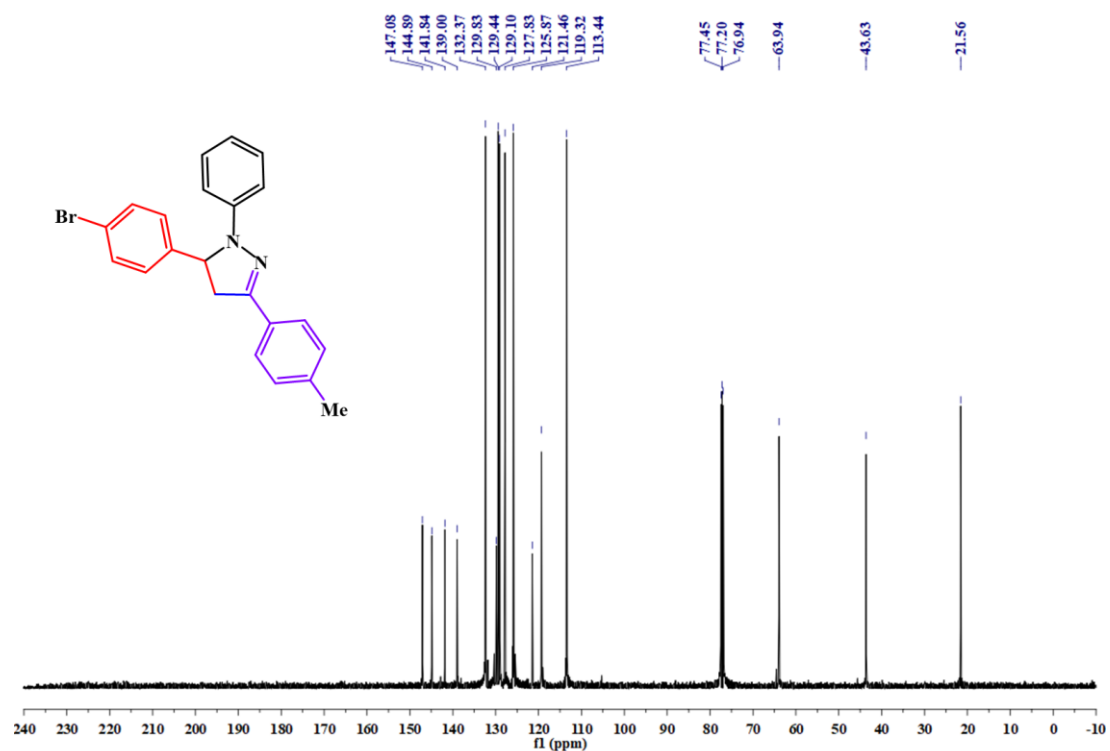

Fig. S54:  $^{13}\text{C}$  NMR spectrum of **4n** in  $\text{CDCl}_3$  at 126 MHz.

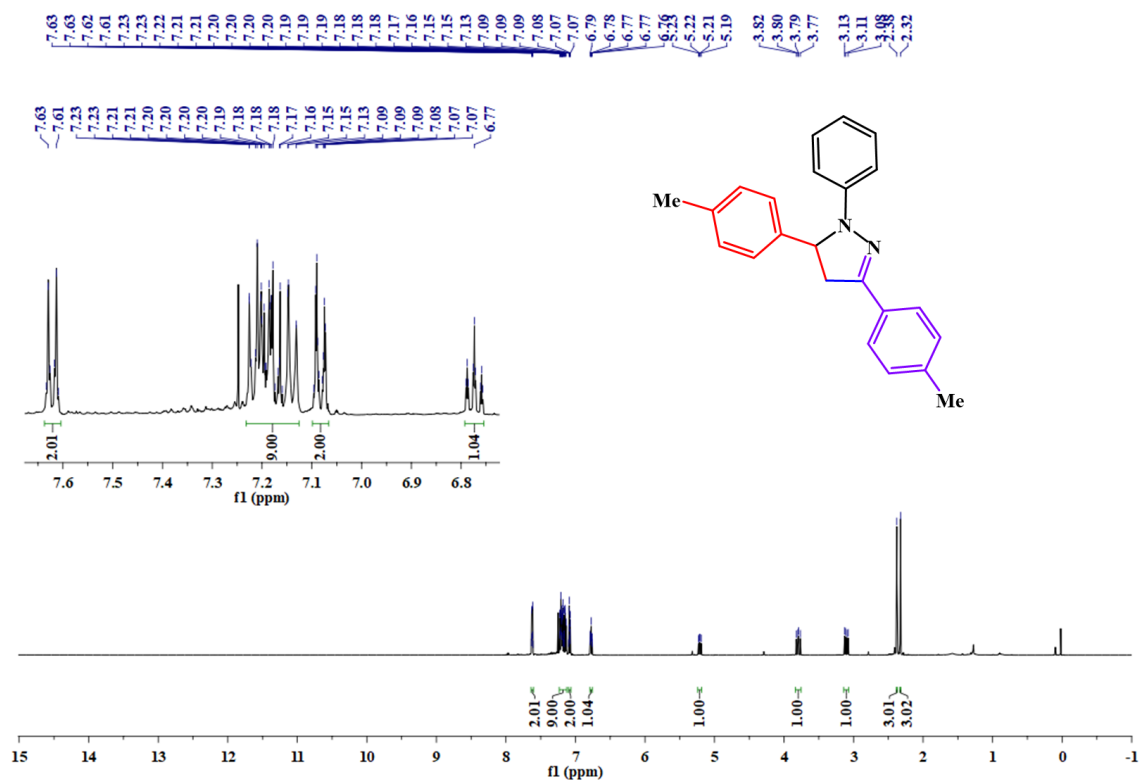

Fig. S55:  $^1\text{H}$  NMR spectrum of **4o** in  $\text{CDCl}_3$  at 500 MHz.

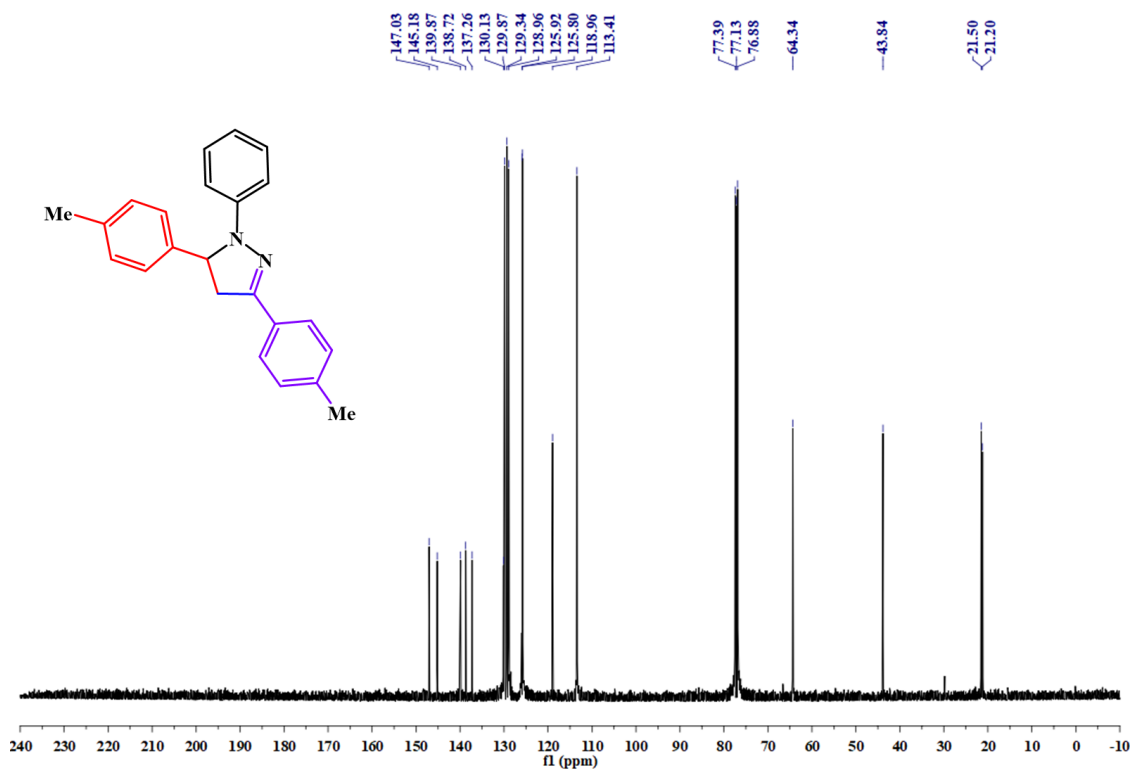

Fig. S56:  $^{13}\text{C}$  NMR spectrum of 4o in  $\text{CDCl}_3$  at 126 MHz.

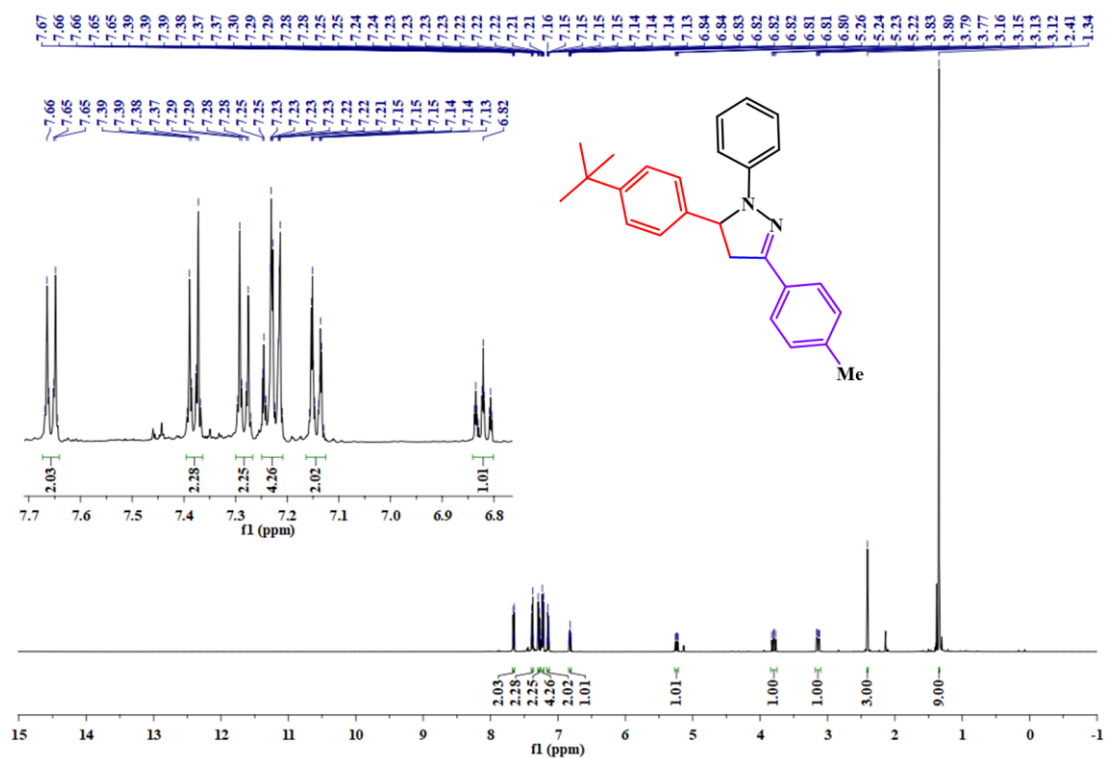

Fig. S57:  $^1\text{H}$  NMR spectrum of 4p in  $\text{CDCl}_3$  at 500 MHz.

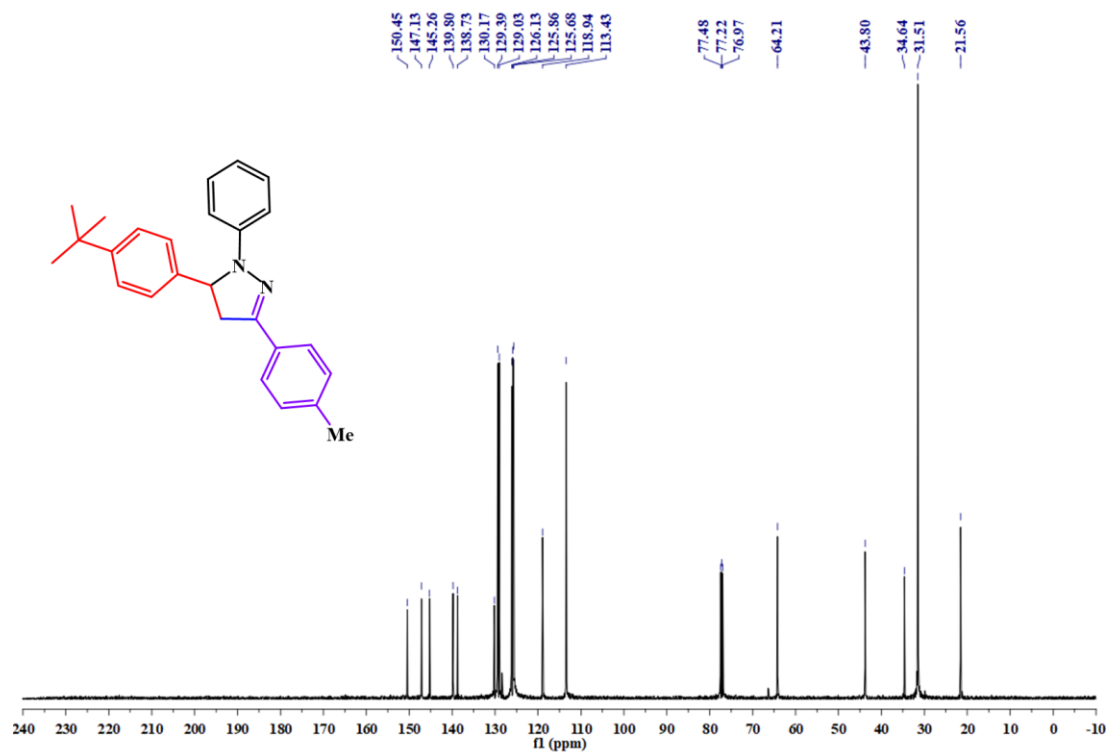

Fig. S58:  $^{13}\text{C}$  NMR spectrum of **4p** in  $\text{CDCl}_3$  at 126 MHz.

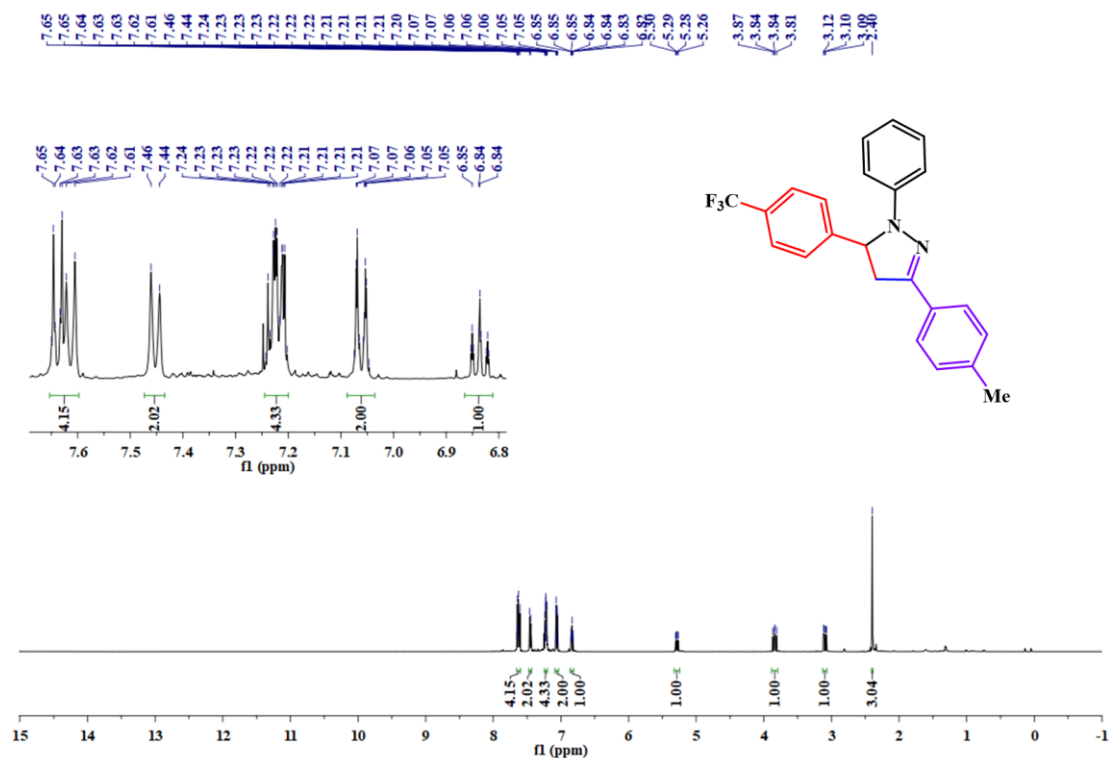

Fig. S59:  $^1\text{H}$  NMR spectrum of **4q** in  $\text{CDCl}_3$  at 500 MHz.

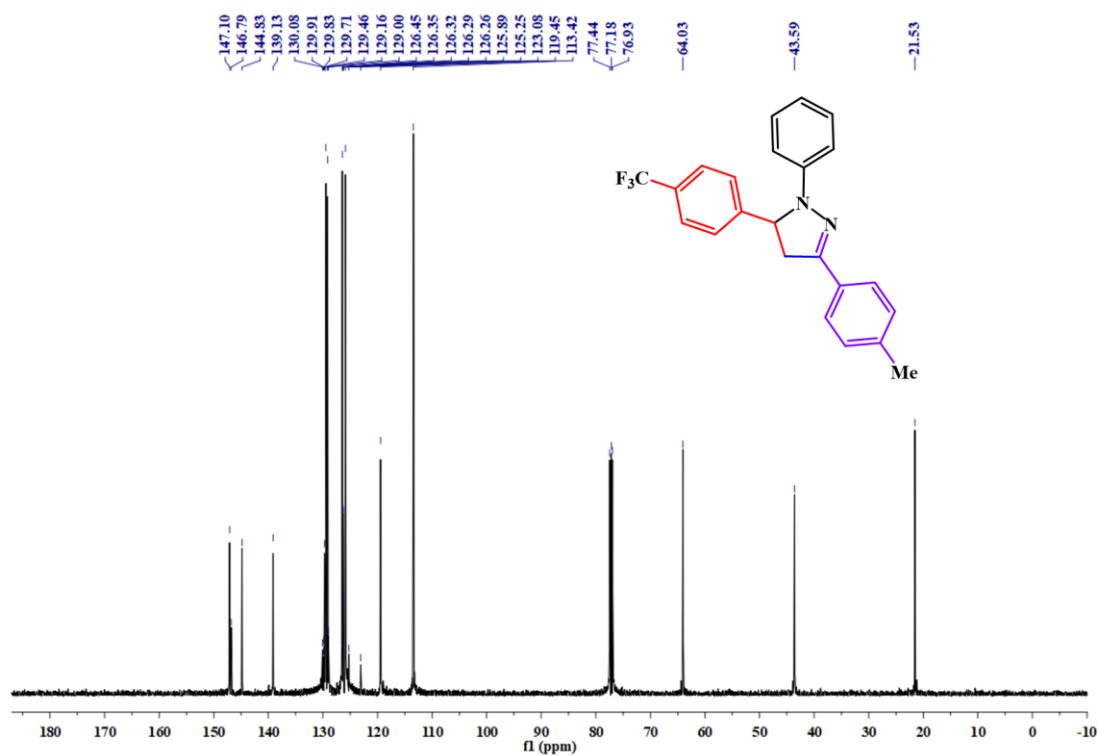

Fig. S60: <sup>13</sup>C NMR spectrum of **4q** in CDCl<sub>3</sub> at 126 MHz.

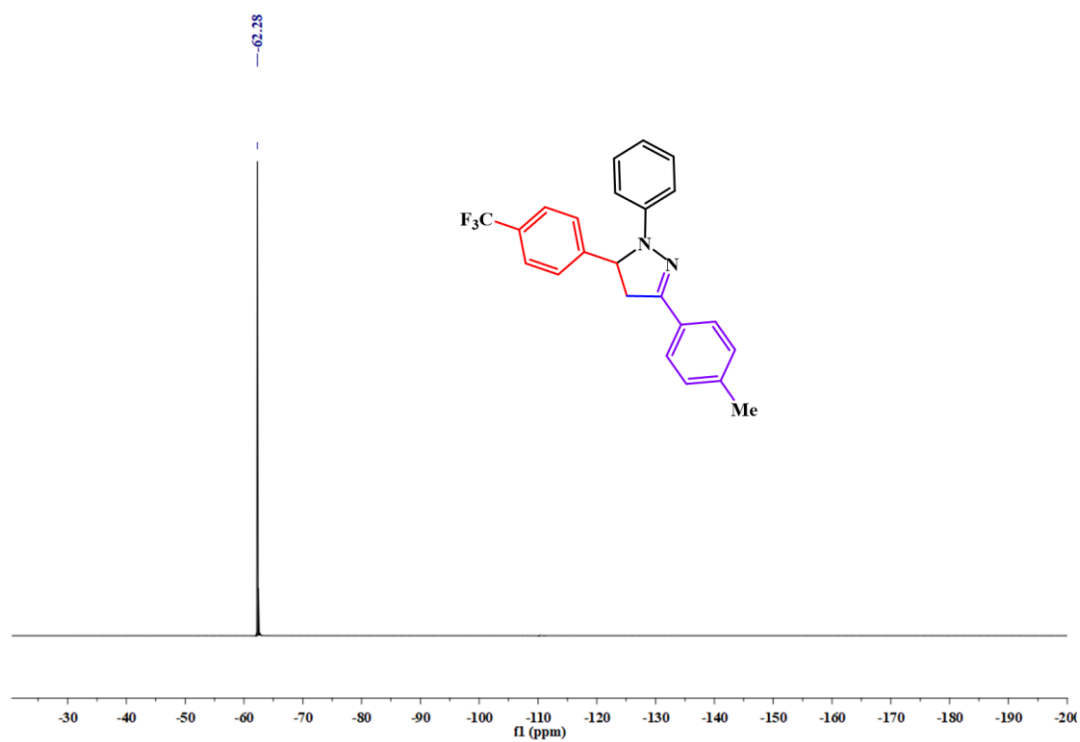

Fig. S61: <sup>19</sup>F NMR spectrum of **4q** in CDCl<sub>3</sub> at 471 MHz.

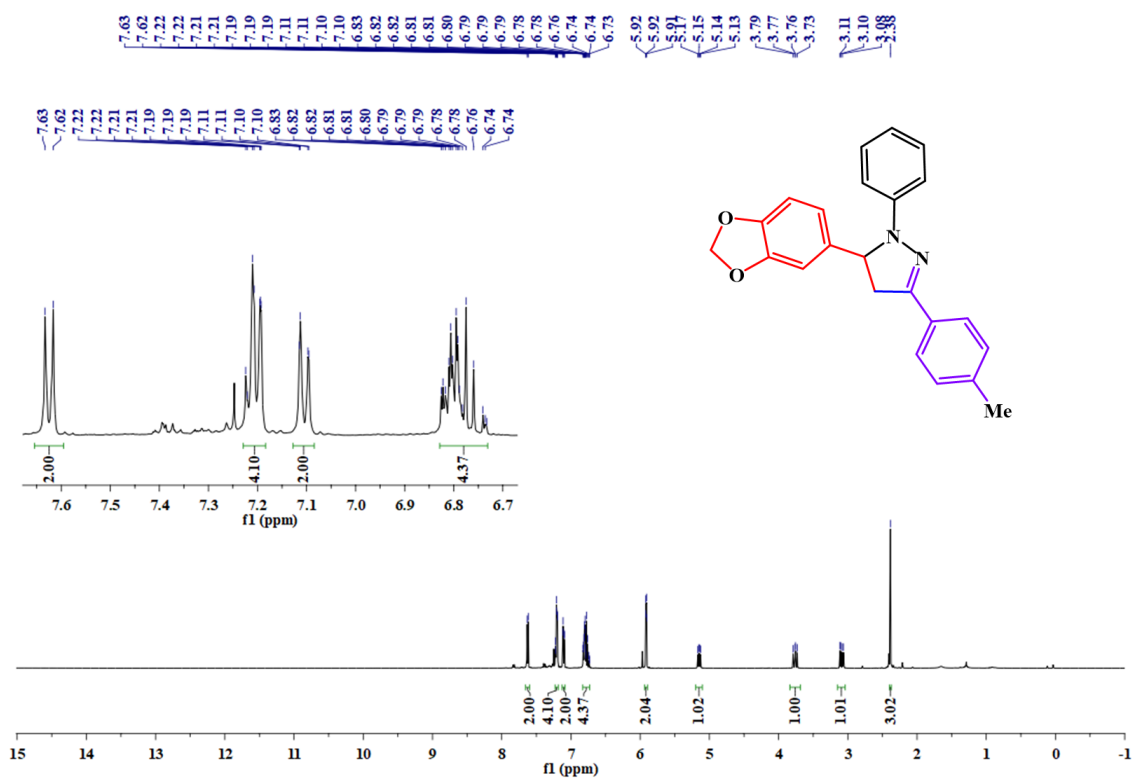

**Fig. S62:** <sup>1</sup>H NMR spectrum of **4r** in CDCl<sub>3</sub> at 500 MHz.

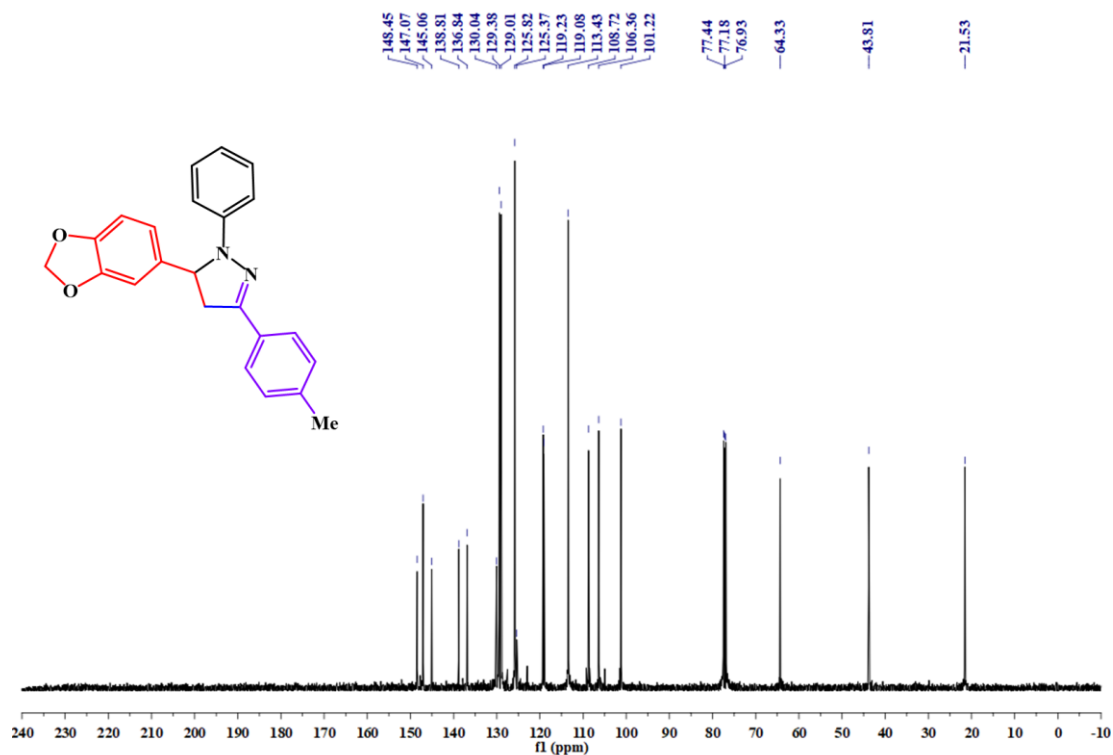

**Fig. S63:** <sup>13</sup>C NMR spectrum of **4r** in CDCl<sub>3</sub> at 126 MHz.

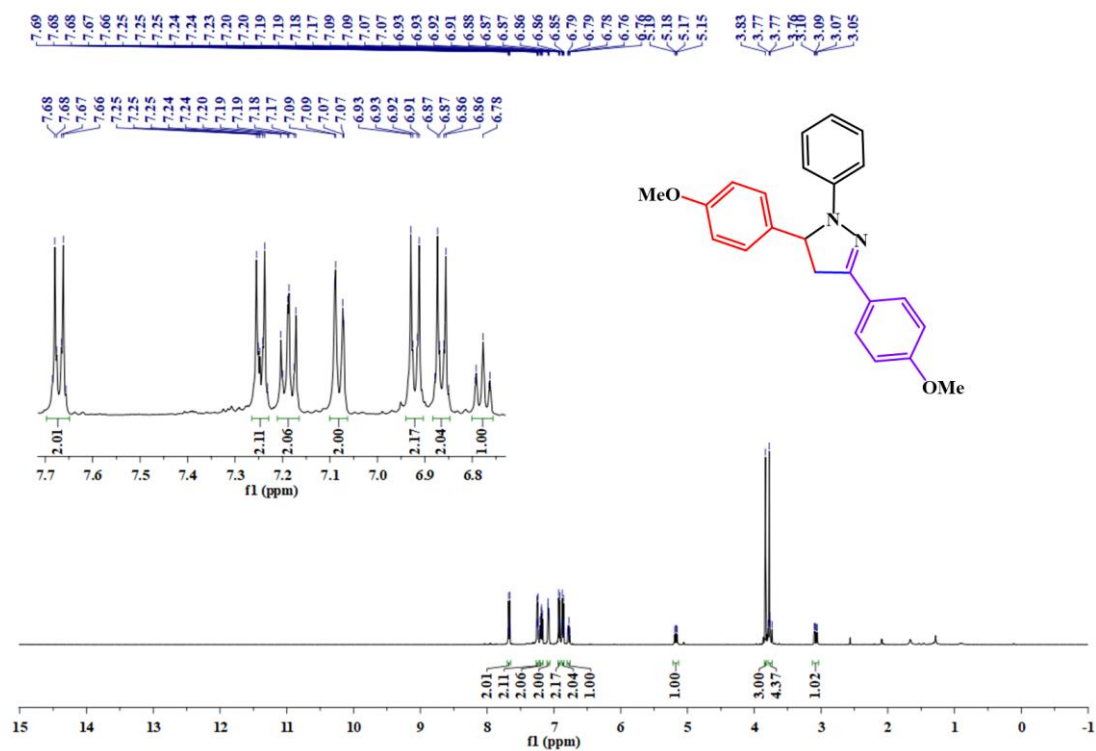

Fig. S64: <sup>1</sup>H NMR spectrum of **4s** in CDCl<sub>3</sub> at 500 MHz.

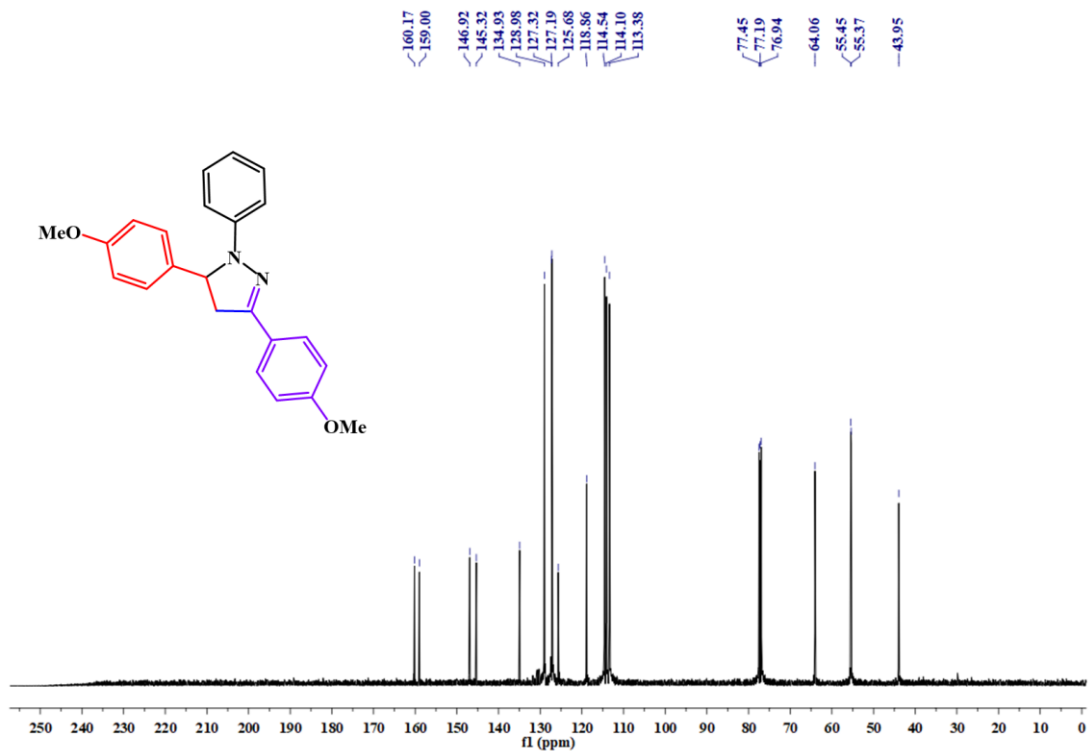

Fig. S65: <sup>13</sup>C NMR spectrum of **4s** in CDCl<sub>3</sub> at 126 MHz.

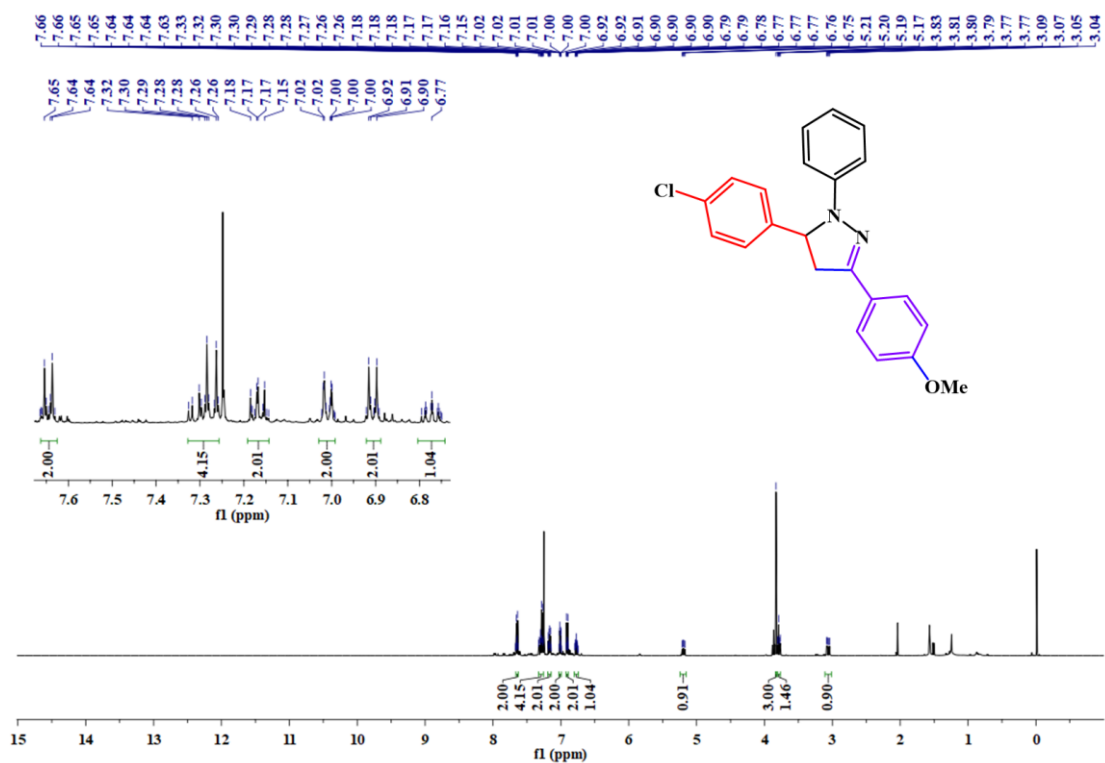

Fig. S66: <sup>1</sup>H NMR spectrum of 4t in CDCl<sub>3</sub> at 500 MHz.

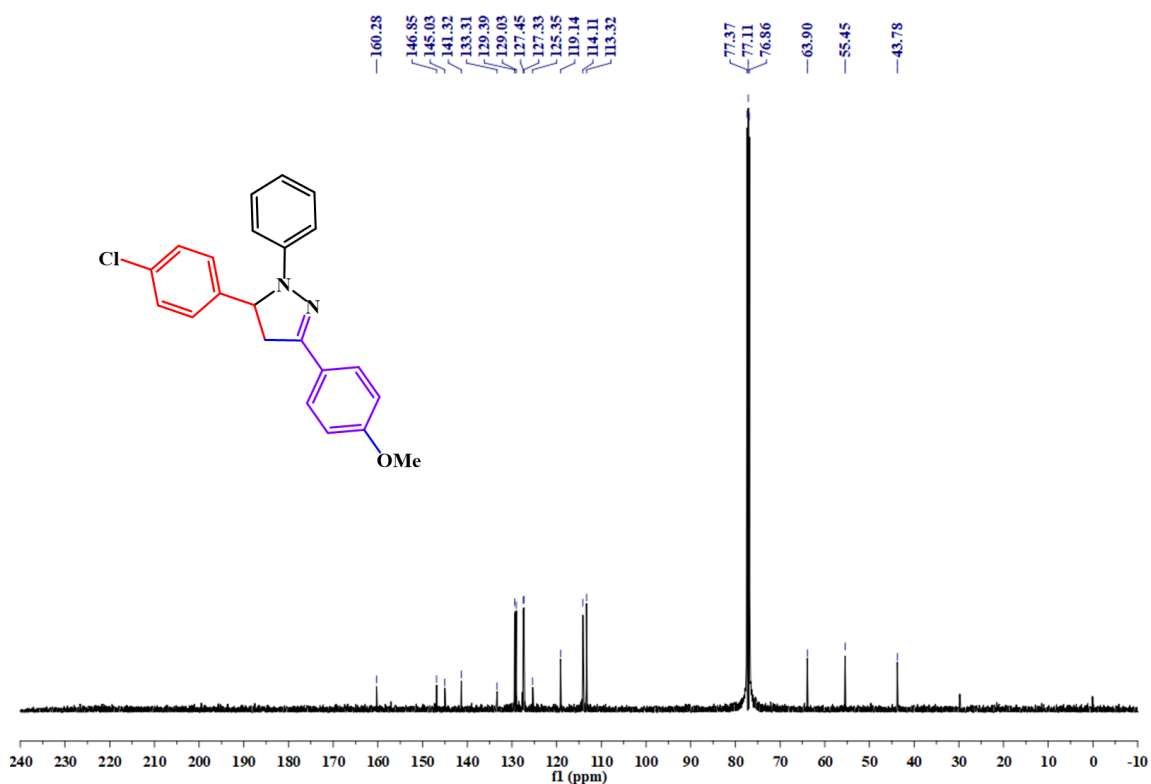

Fig. S67: <sup>13</sup>C NMR spectrum of 4t in CDCl<sub>3</sub> at 126 MHz.



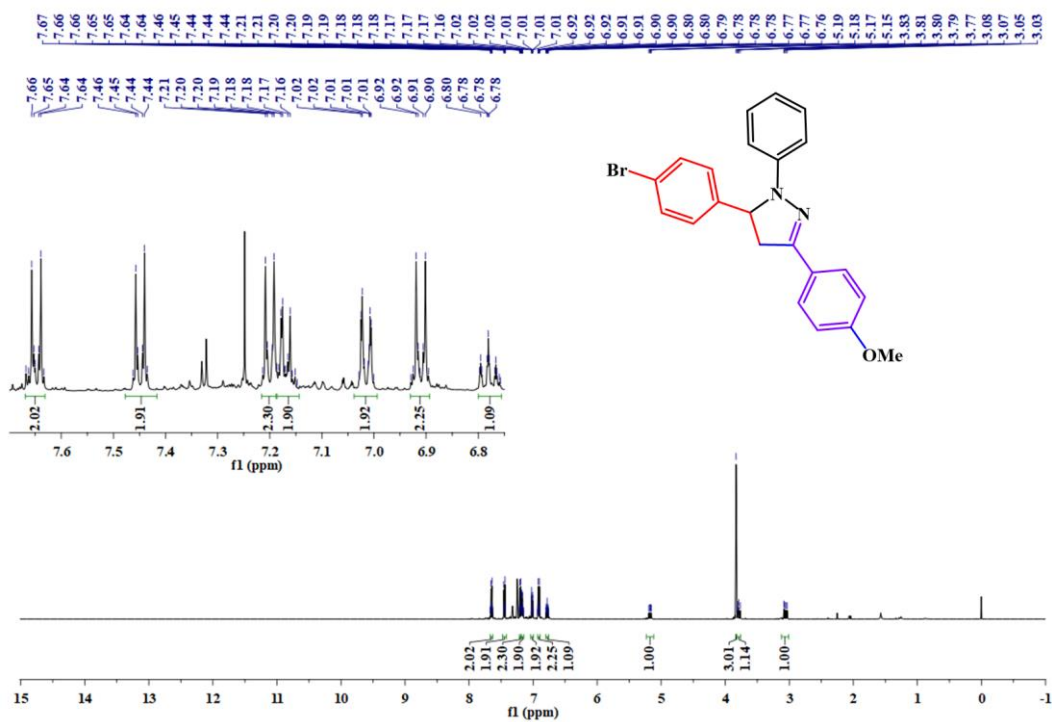

Fig. S68: <sup>1</sup>H NMR spectrum of **4u** in CDCl<sub>3</sub> at 500 MHz.

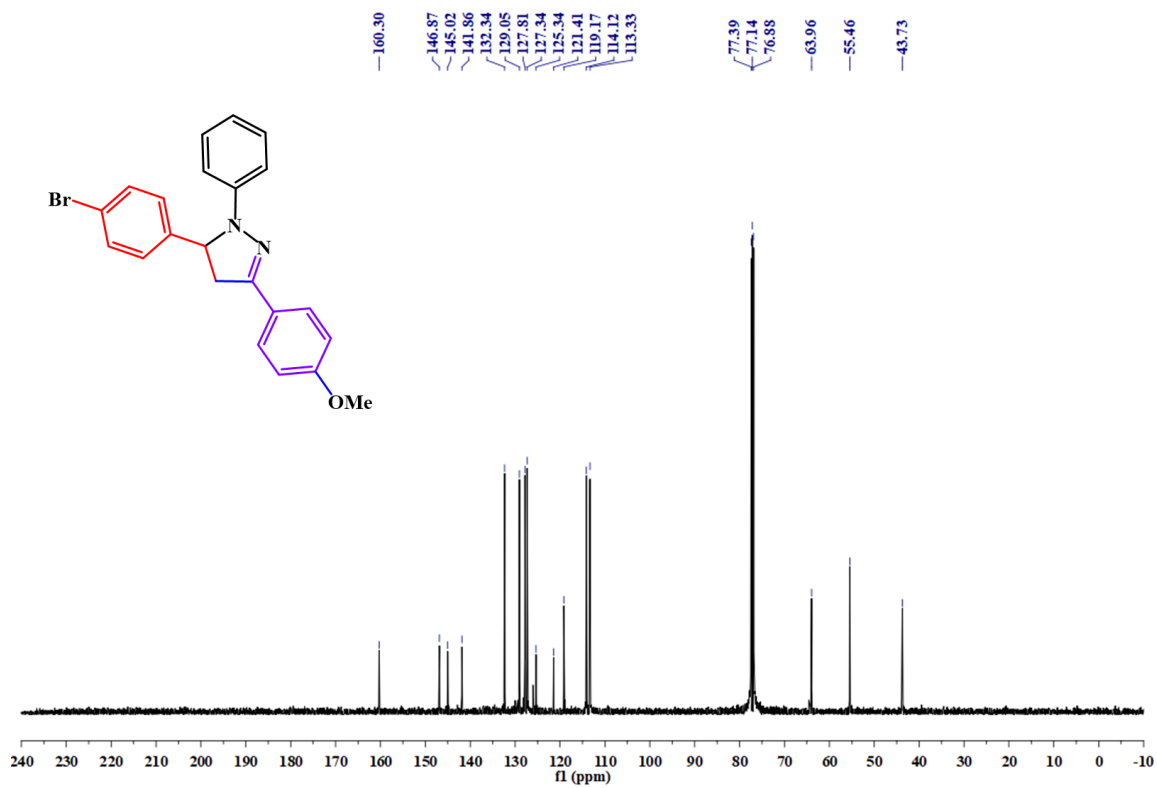

Fig. S69: <sup>13</sup>C NMR spectrum of **4u** in CDCl<sub>3</sub> at 126 MHz.

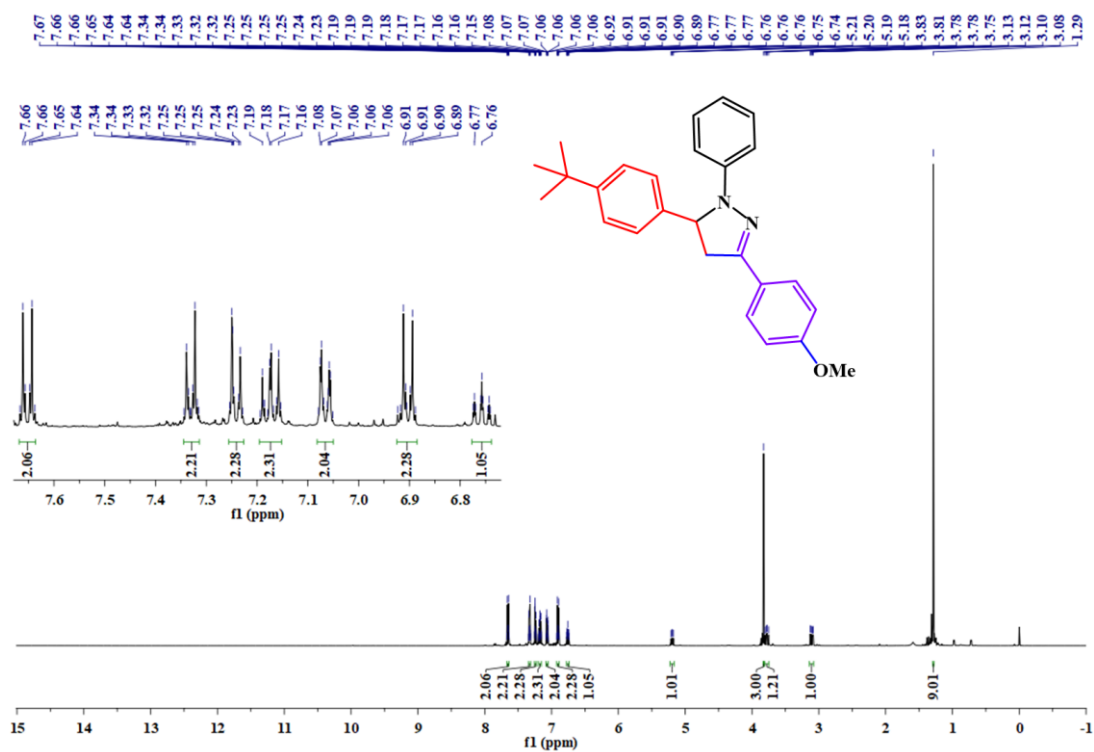

**Fig. S70:**  $^1\text{H}$  NMR spectrum of **4v** in  $\text{CDCl}_3$  at 500 MHz.

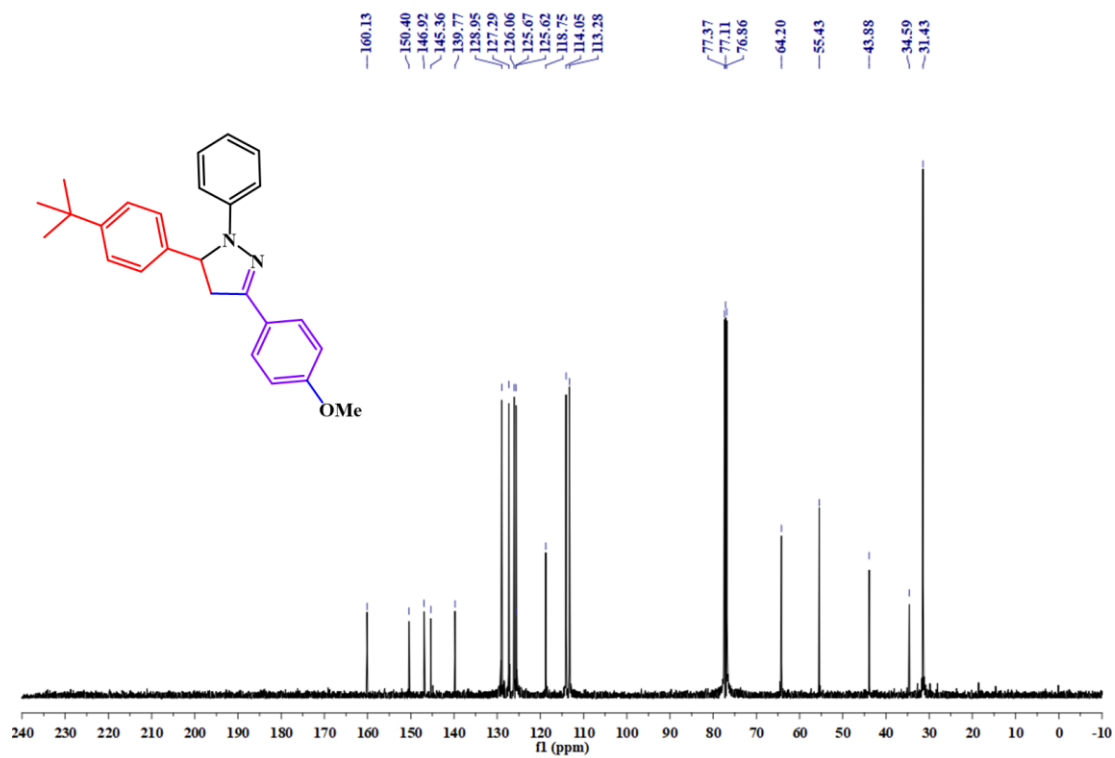

**Fig. S71:**  $^{13}\text{C}$  NMR spectrum of **4v** in  $\text{CDCl}_3$  at 126 MHz.

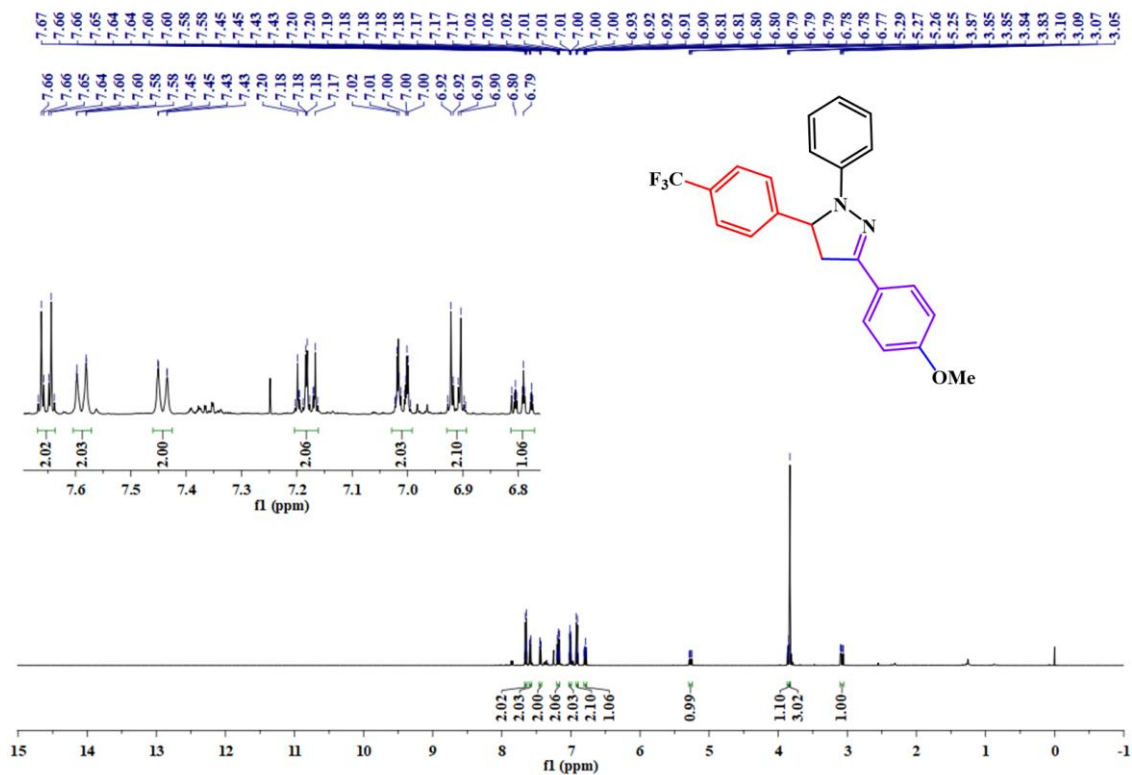

Fig. S72: <sup>1</sup>H NMR spectrum of **4w** in CDCl<sub>3</sub> at 500 MHz.

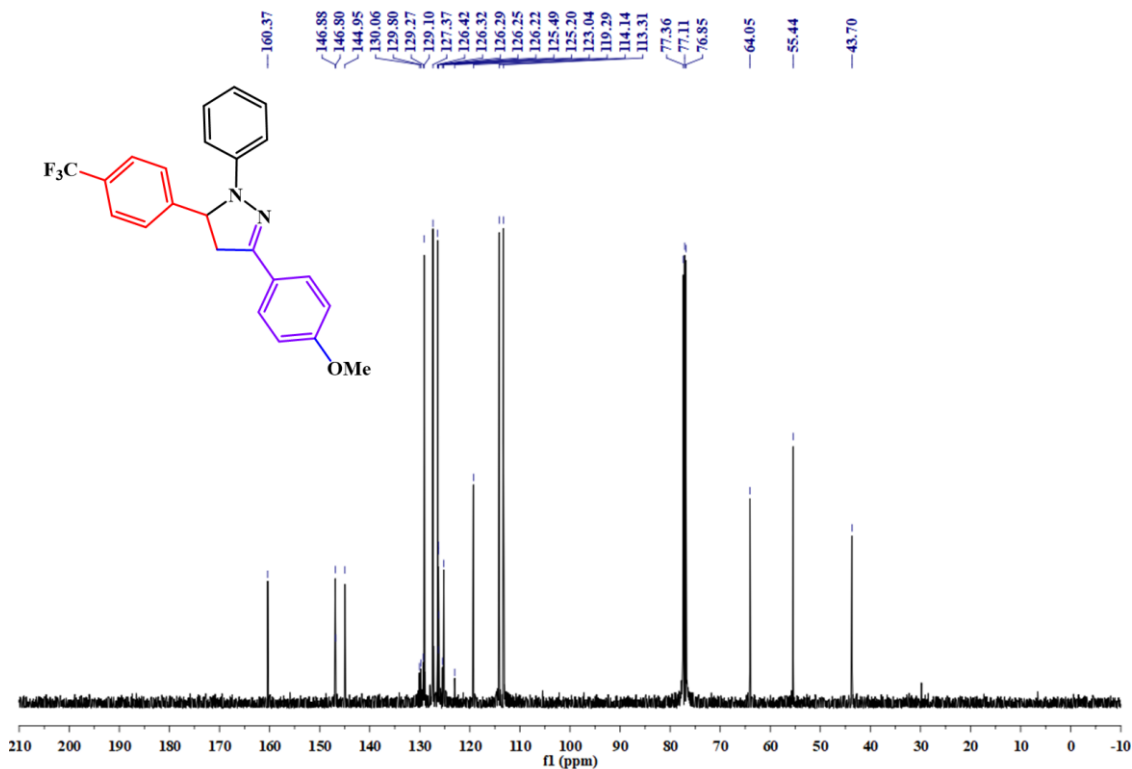

Fig. S73:  $^{13}\text{C}$  NMR spectrum of **4w** in  $\text{CDCl}_3$  at 126 MHz.

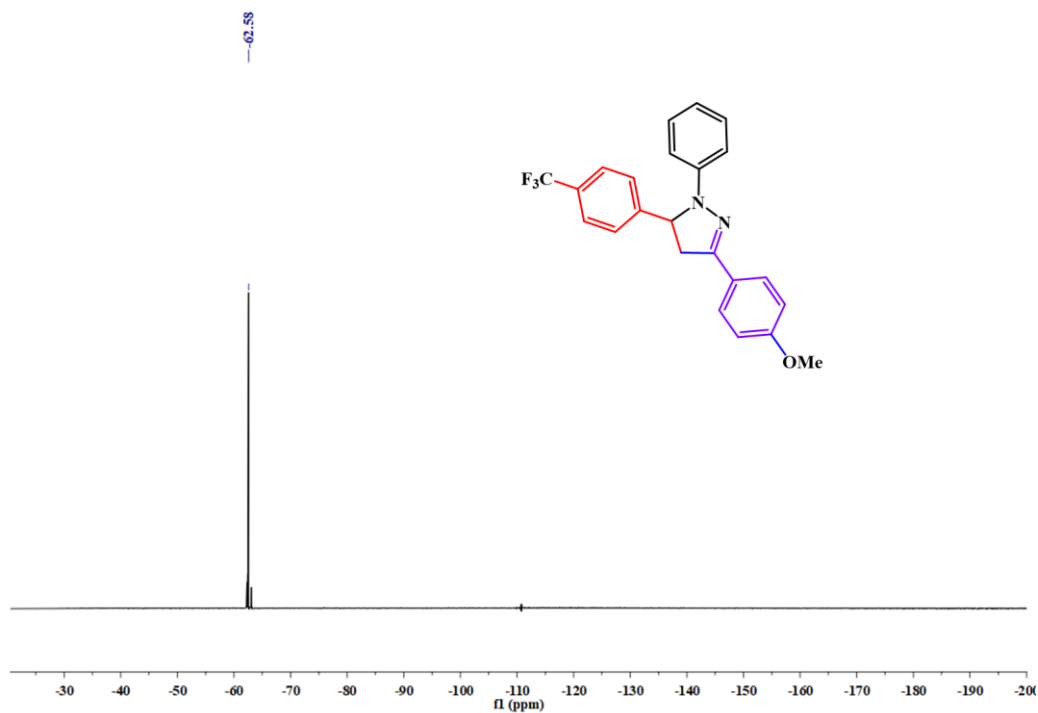

Fig. S74:  $^{19}\text{F}$  NMR spectrum of **4w** in  $\text{CDCl}_3$  at 471 MHz.

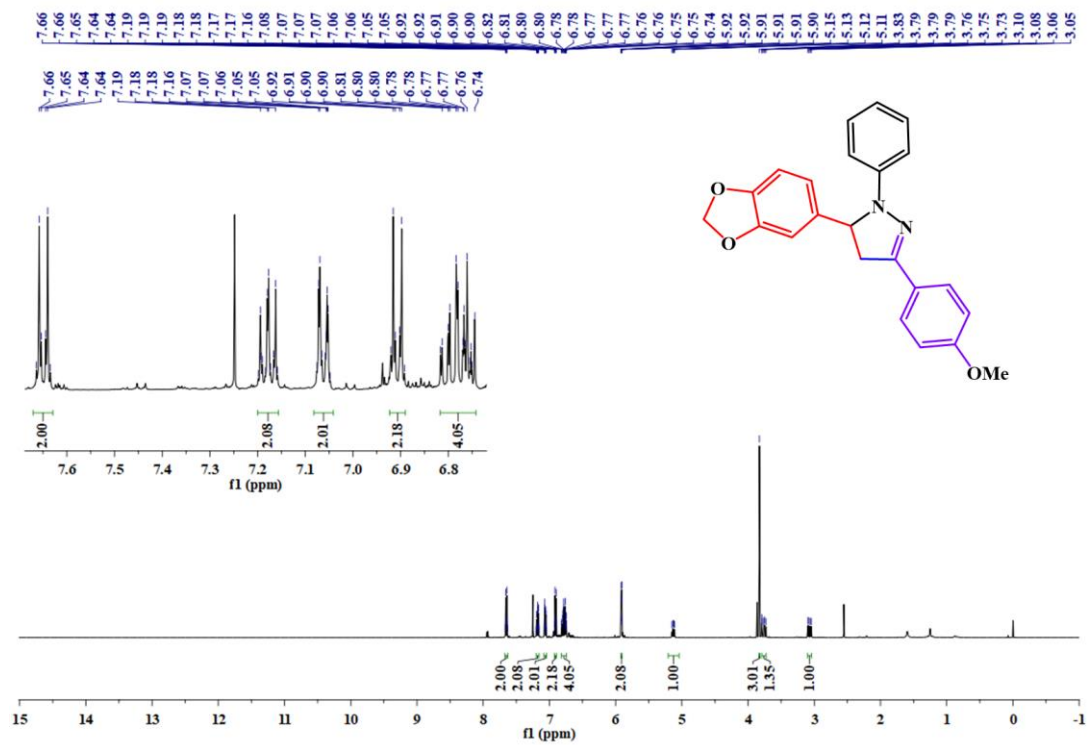

Fig. S75:  $^1\text{H}$  NMR spectrum of **4x** in  $\text{CDCl}_3$  at 500 MHz.

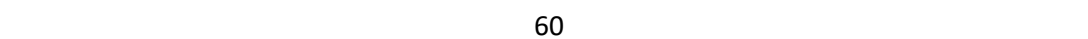

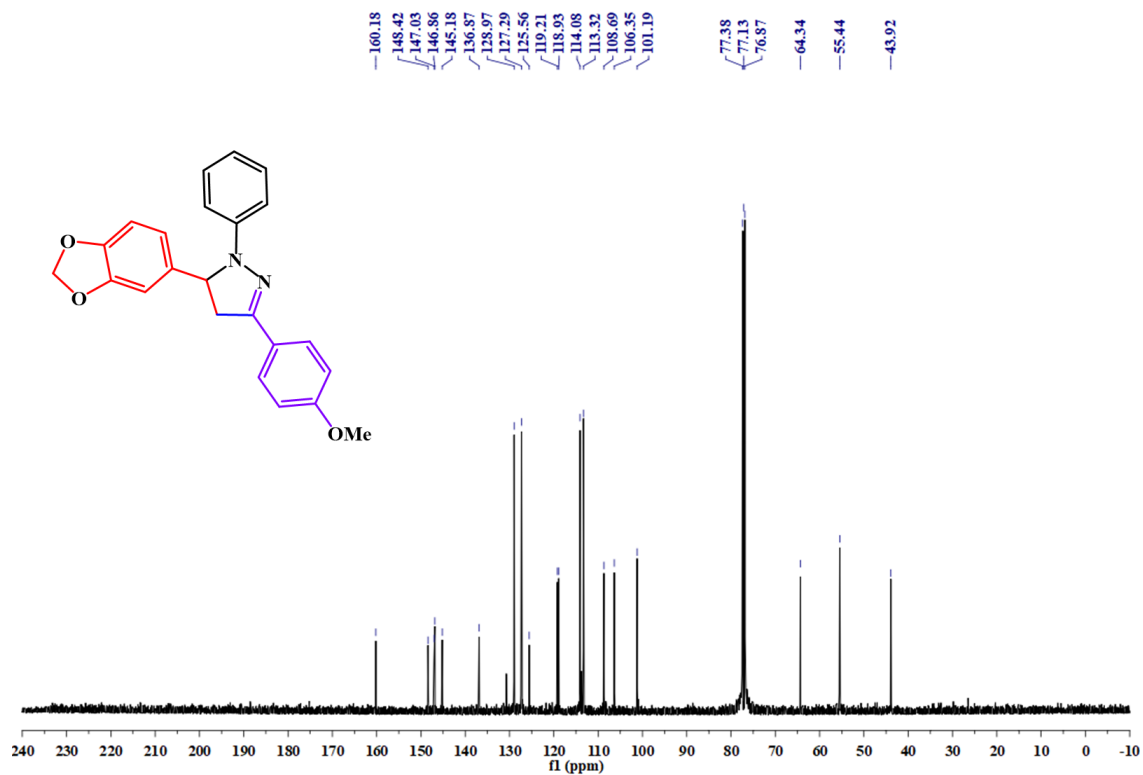

**Fig. S76:**  $^{13}\text{C}$  NMR spectrum of **4x** in  $\text{CDCl}_3$  at 126 MHz.

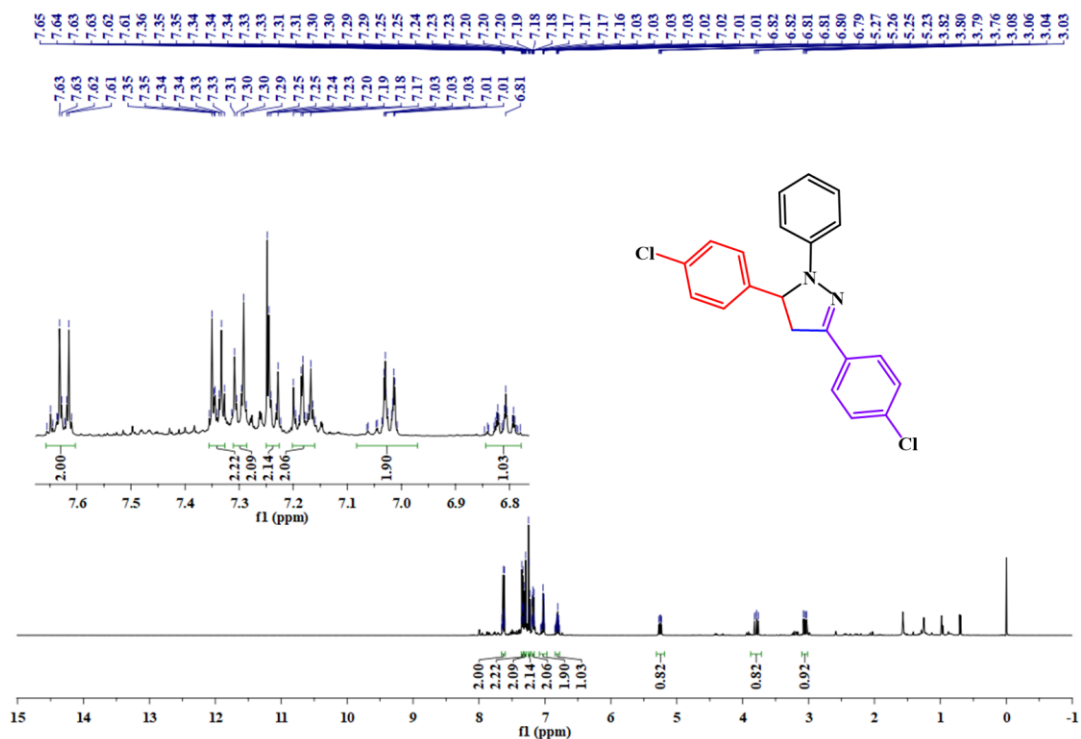

**Fig. S77:**  $^1\text{H}$  NMR spectrum of **4y** in  $\text{CDCl}_3$  at 500 MHz.

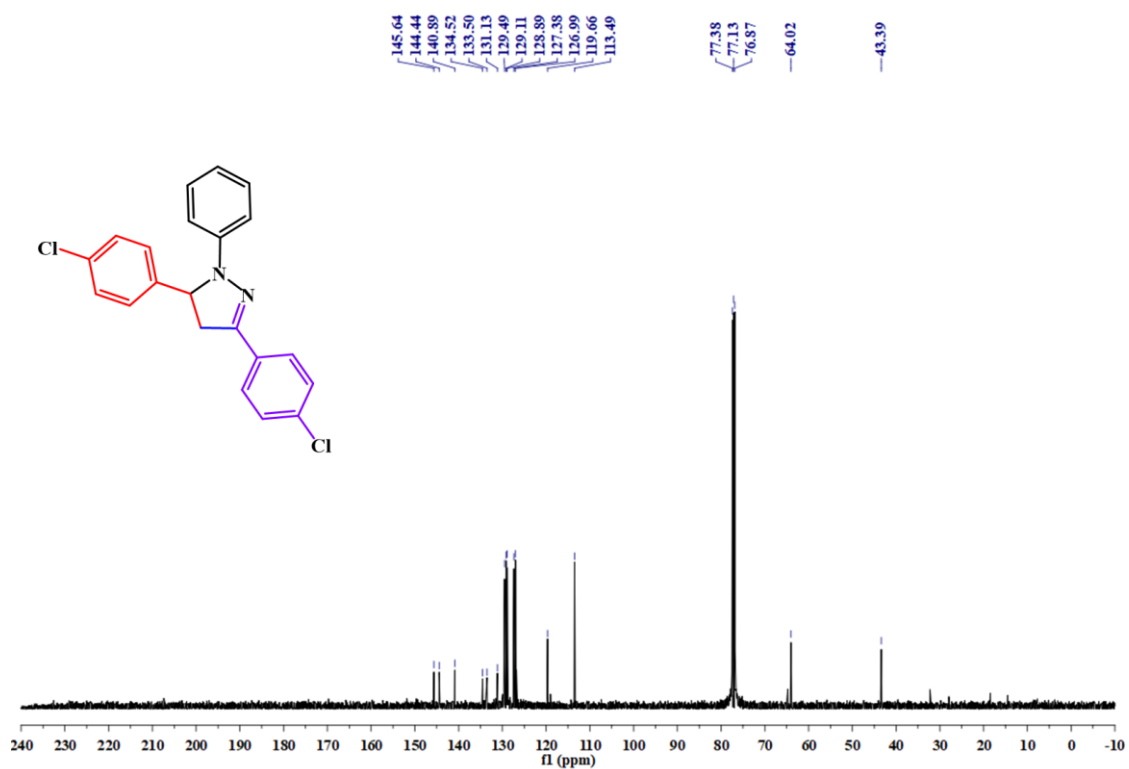

Fig. S78:  $^{13}\text{C}$  NMR spectrum of **4y** in  $\text{CDCl}_3$  at 126 MHz.

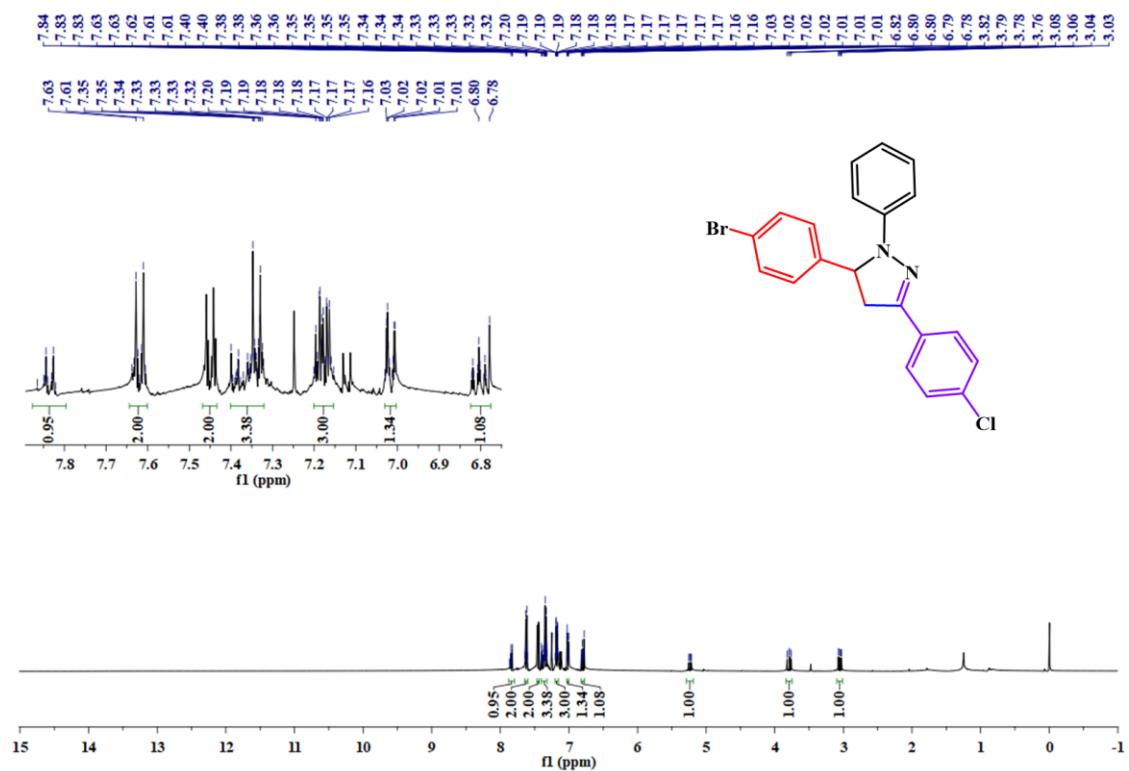

Fig. S79:  $^1\text{H}$  NMR spectrum of **4z** in  $\text{CDCl}_3$  at 500 MHz.

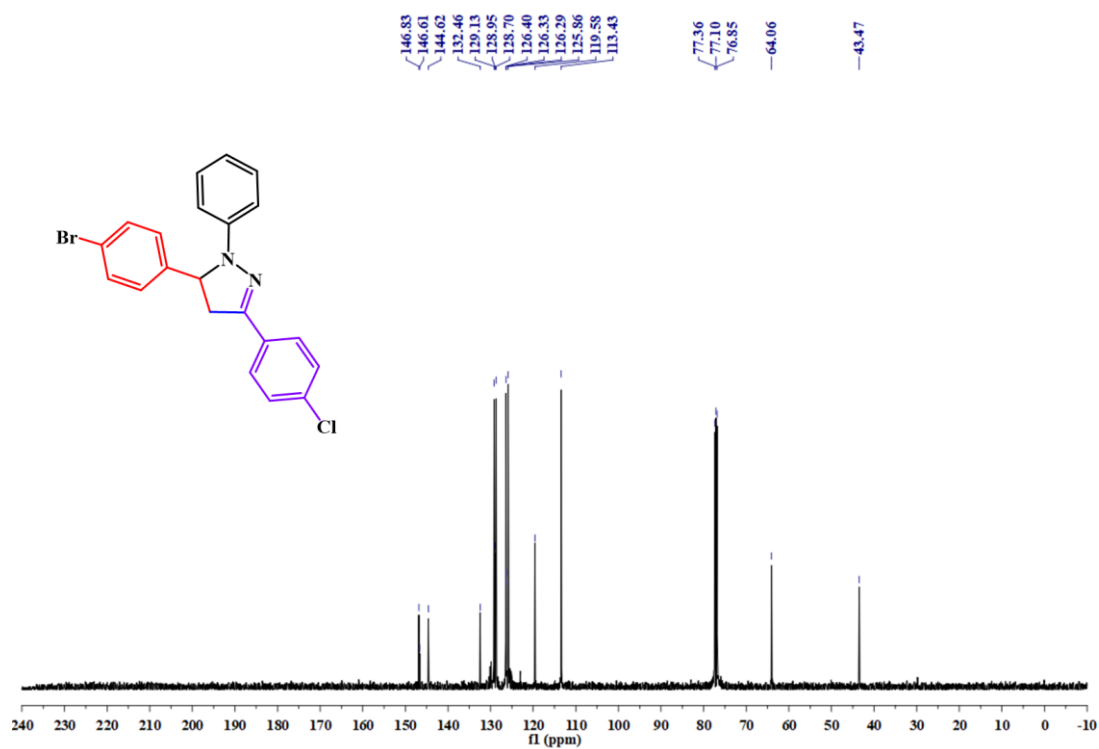

**Fig. S80:** <sup>13</sup>C NMR spectrum of **4z** in CDCl<sub>3</sub> at 126 MHz.

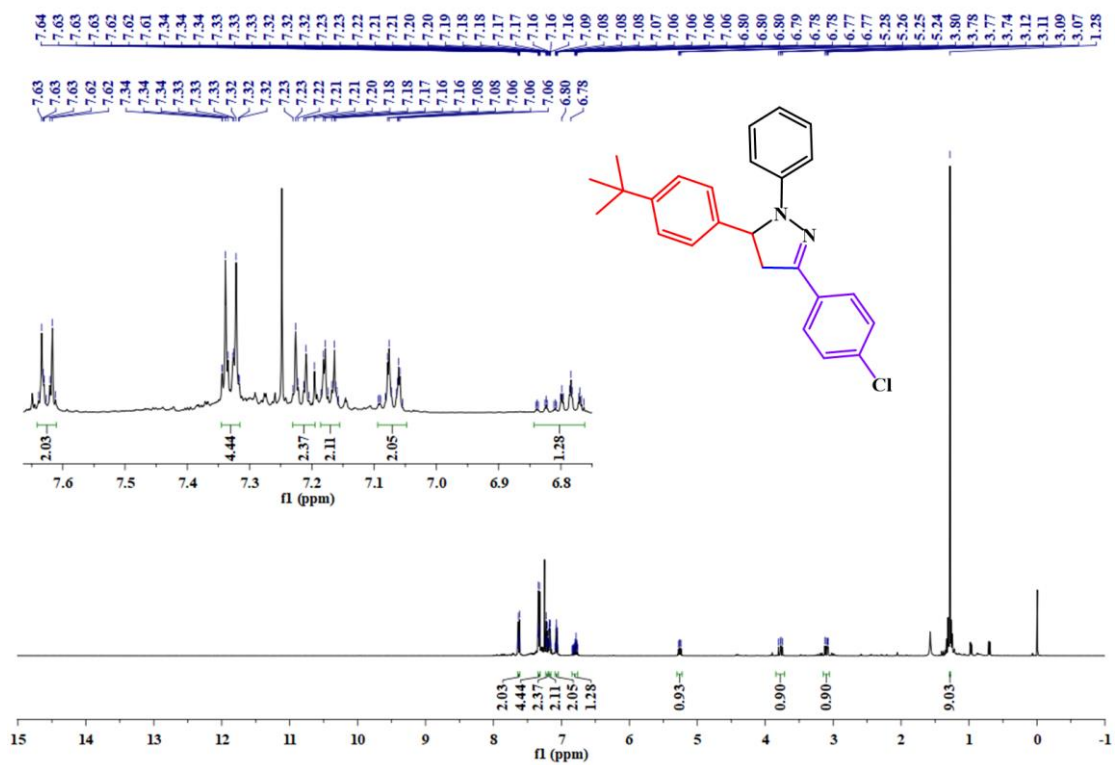

**Fig. S81:** <sup>1</sup>H NMR spectrum of **4aa** in CDCl<sub>3</sub> at 500 MHz.

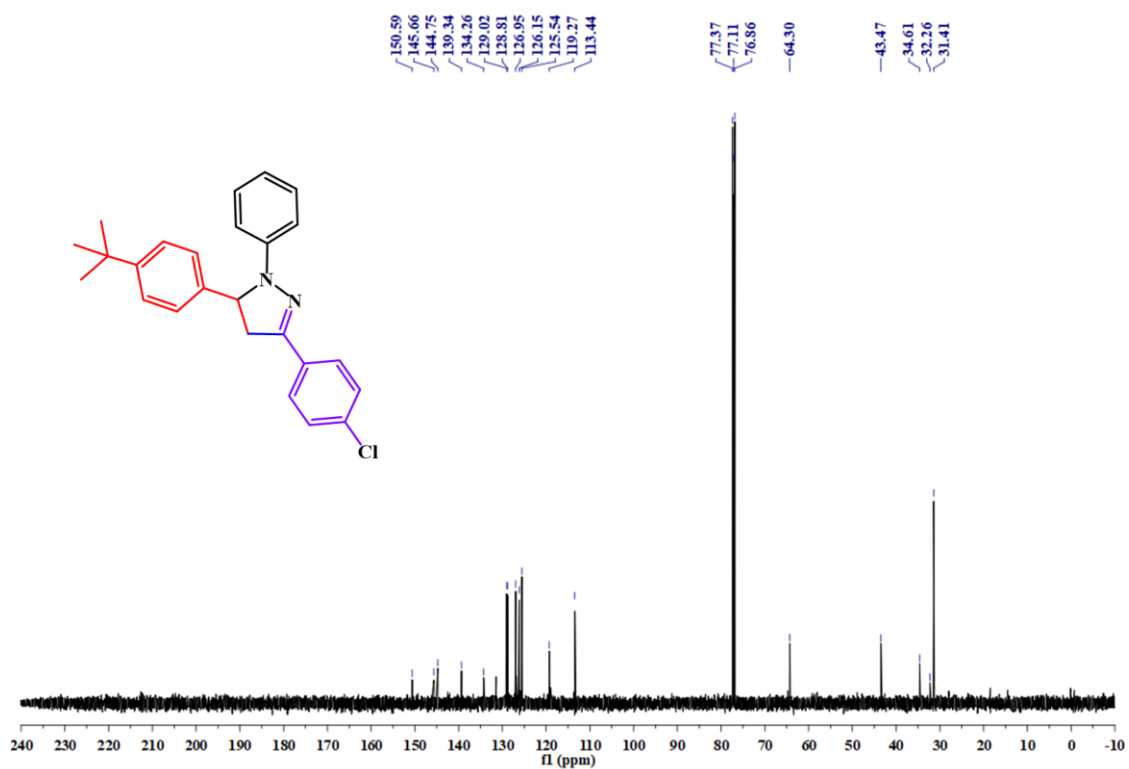

Fig. S82:  $^{13}\text{C}$  NMR spectrum of 4aa in  $\text{CDCl}_3$  at 126 MHz.

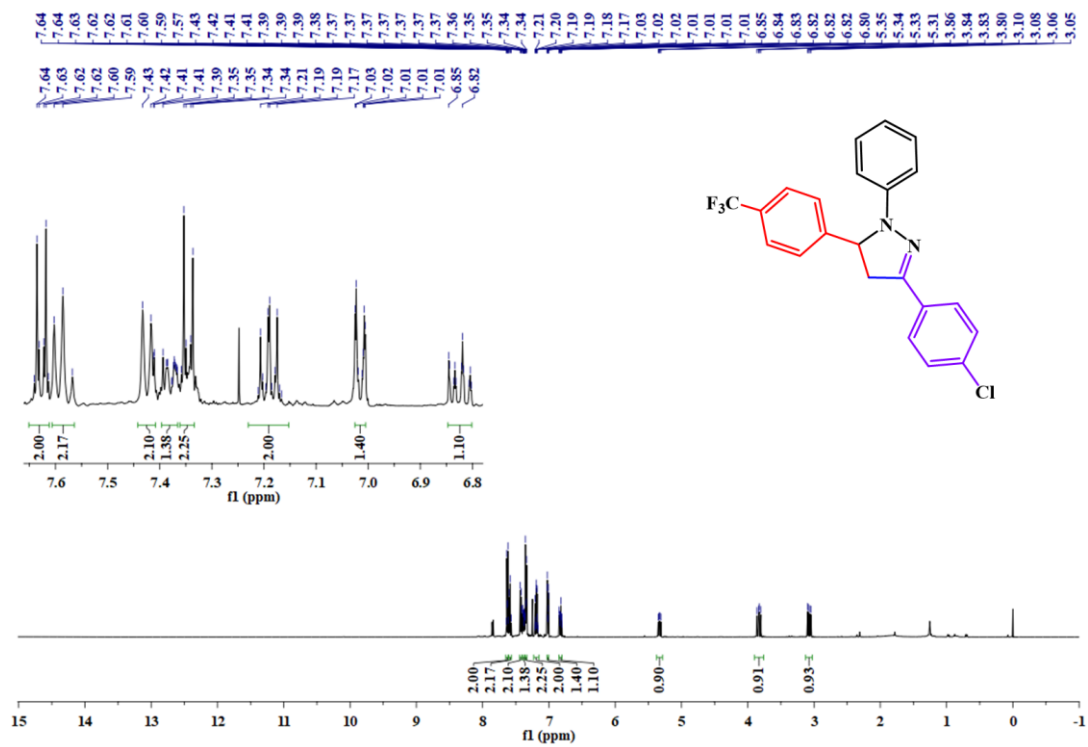

Fig. S83:  $^1\text{H}$  NMR spectrum of 4ab in  $\text{CDCl}_3$  at 500 MHz.



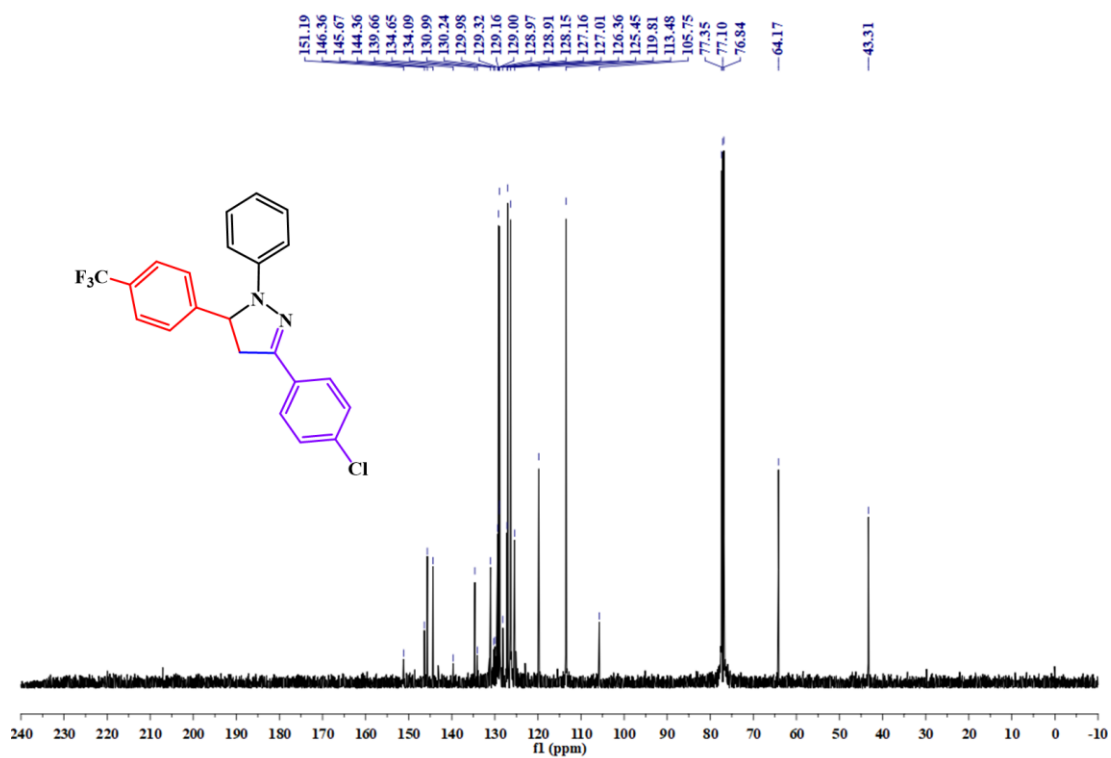

**Fig. S84:**  $^{13}\text{C}$  NMR spectrum of **4ab** in  $\text{CDCl}_3$  at 126 MHz.

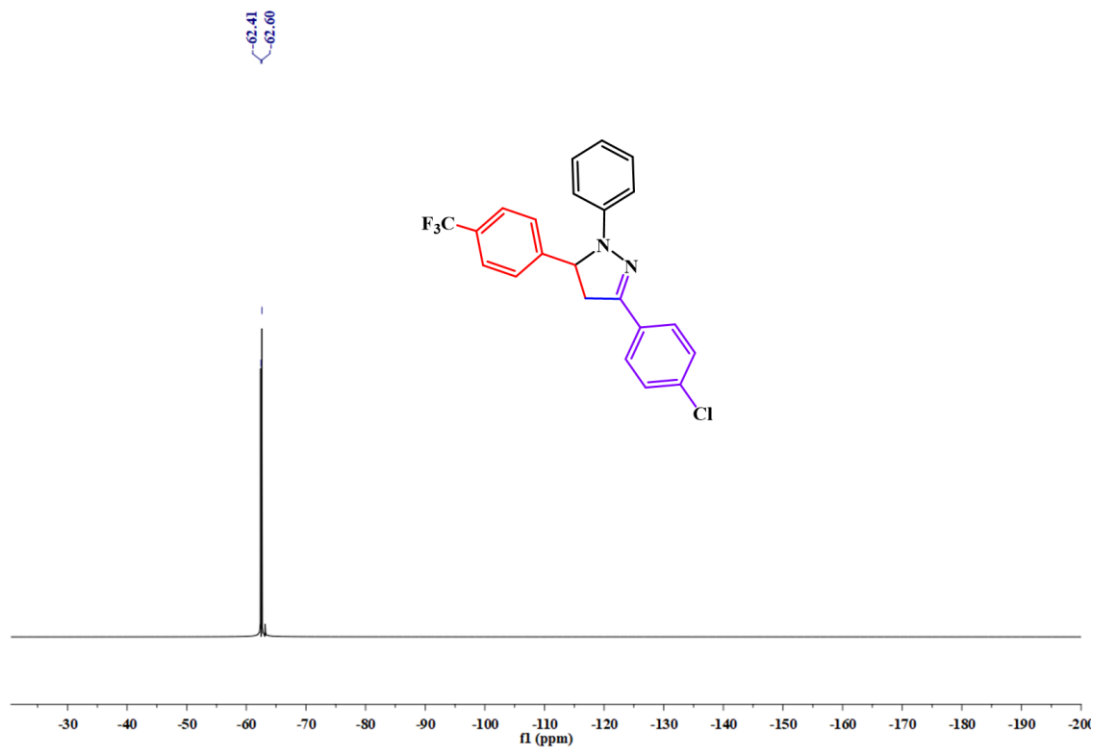

**Fig. S85:**  $^{19}\text{F}$  NMR spectrum of **4ab** in  $\text{CDCl}_3$  at 471 MHz.

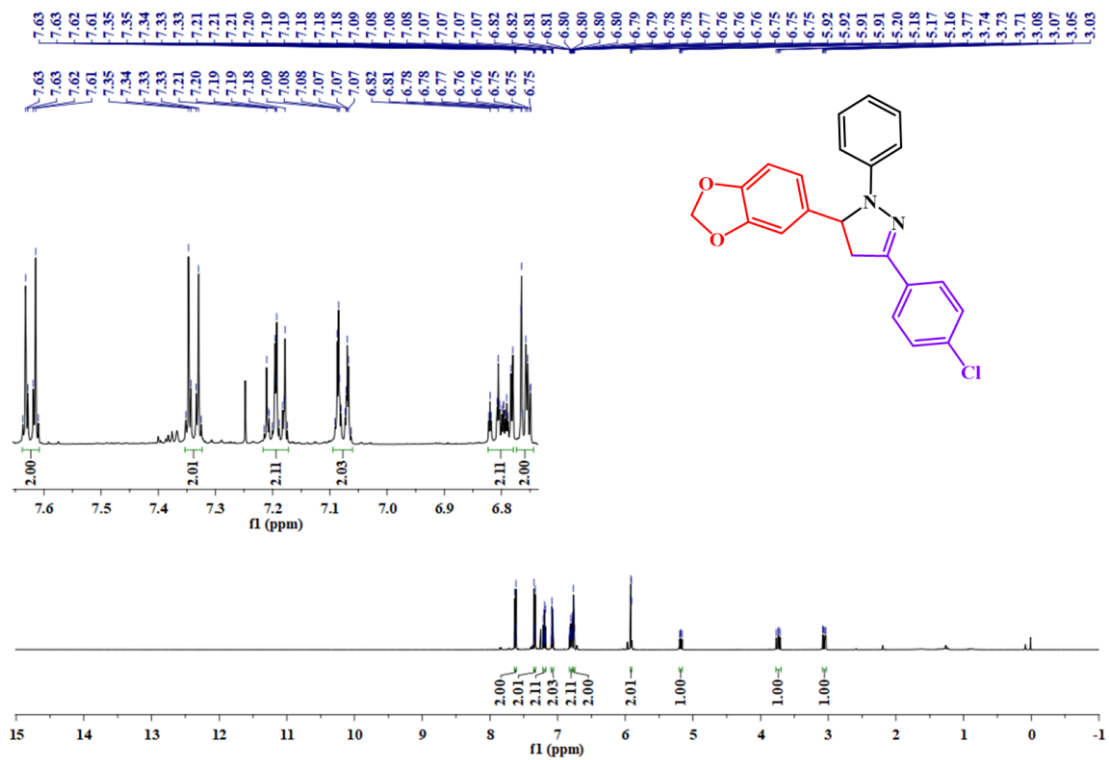

Fig. S86: <sup>1</sup>H NMR spectrum of **4ac** in CDCl<sub>3</sub> at 500 MHz.

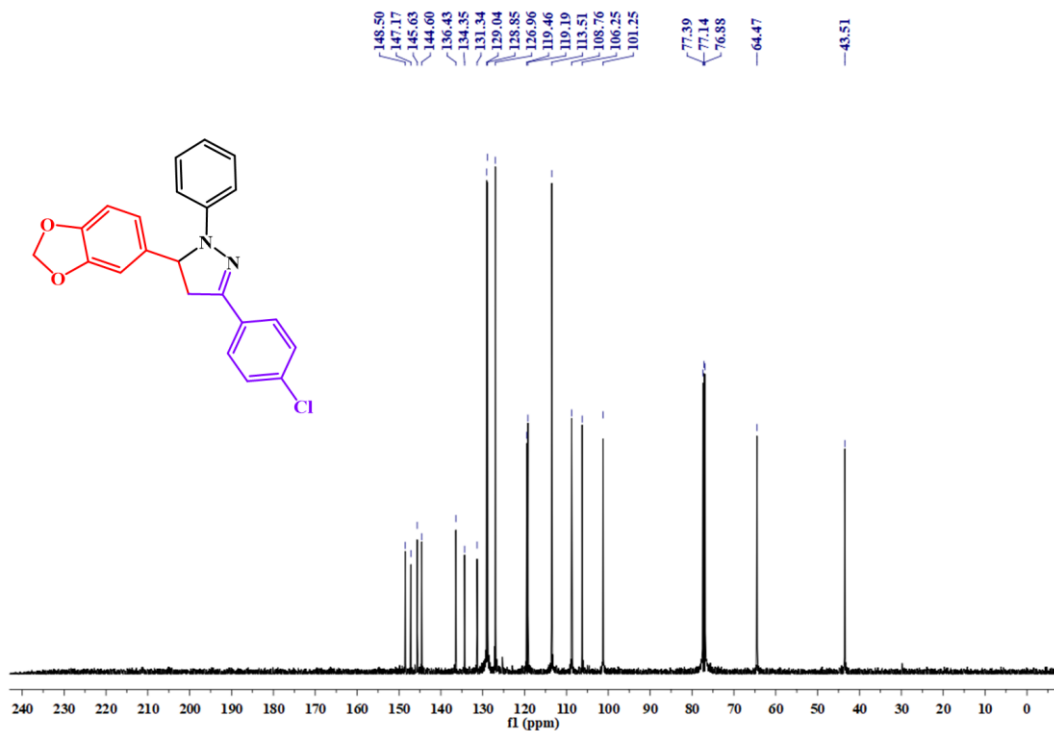

Fig. S87: <sup>13</sup>C NMR spectrum of **4ac** in CDCl<sub>3</sub> at 126 MHz.

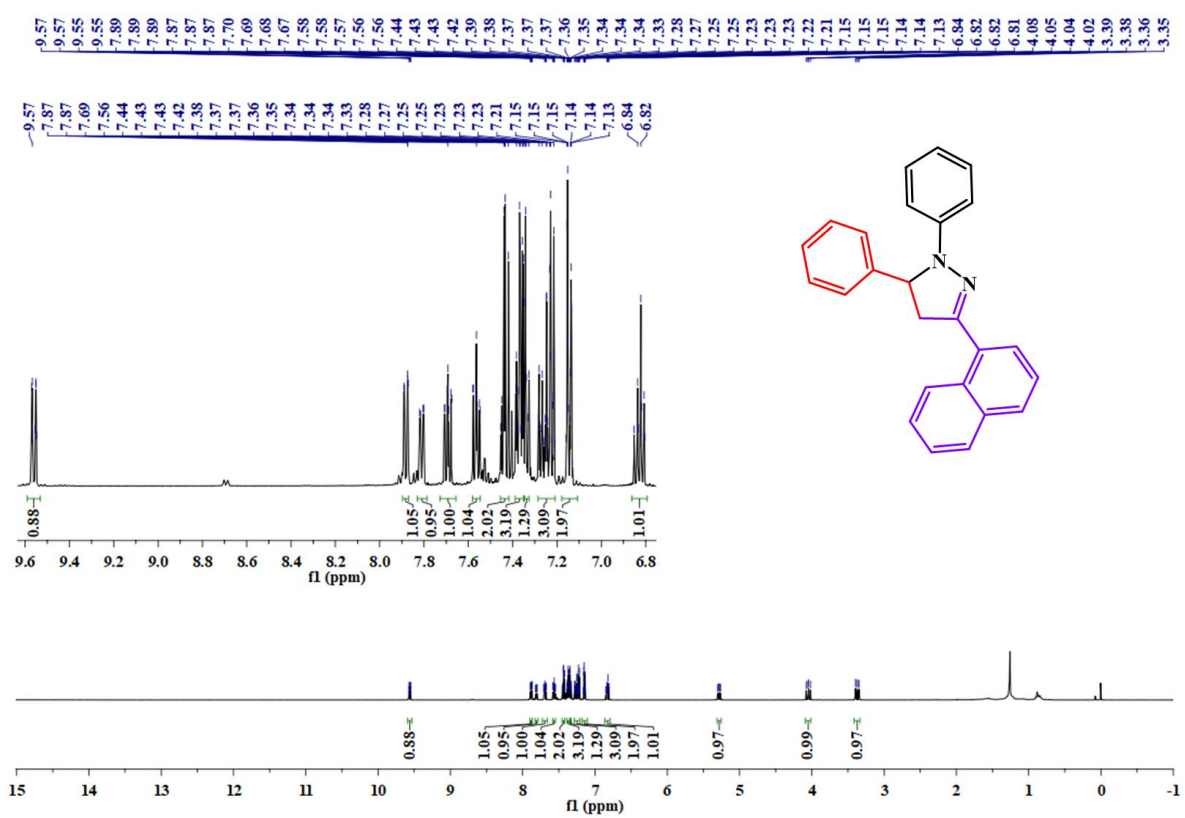

**Fig. S88:** <sup>1</sup>H NMR spectrum of **4ad** in CDCl<sub>3</sub> at 500 MHz.

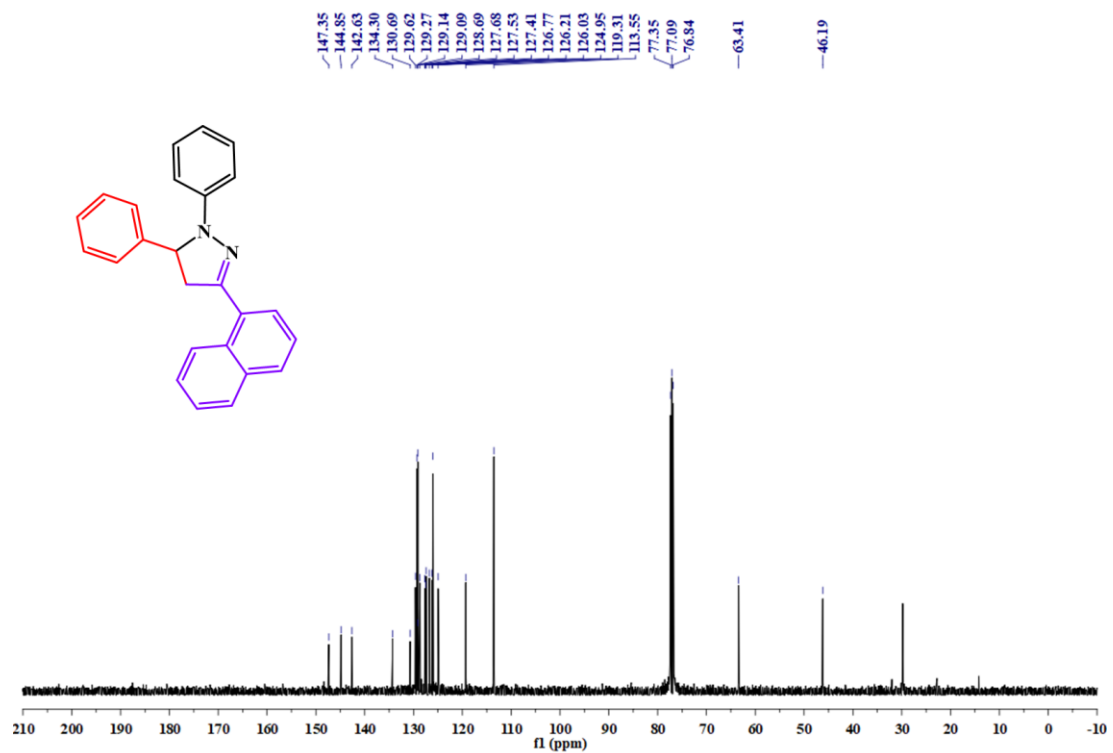

Fig. S89:  $^{13}\text{C}$  NMR spectrum of **4ad** in  $\text{CDCl}_3$  at 126 MHz.

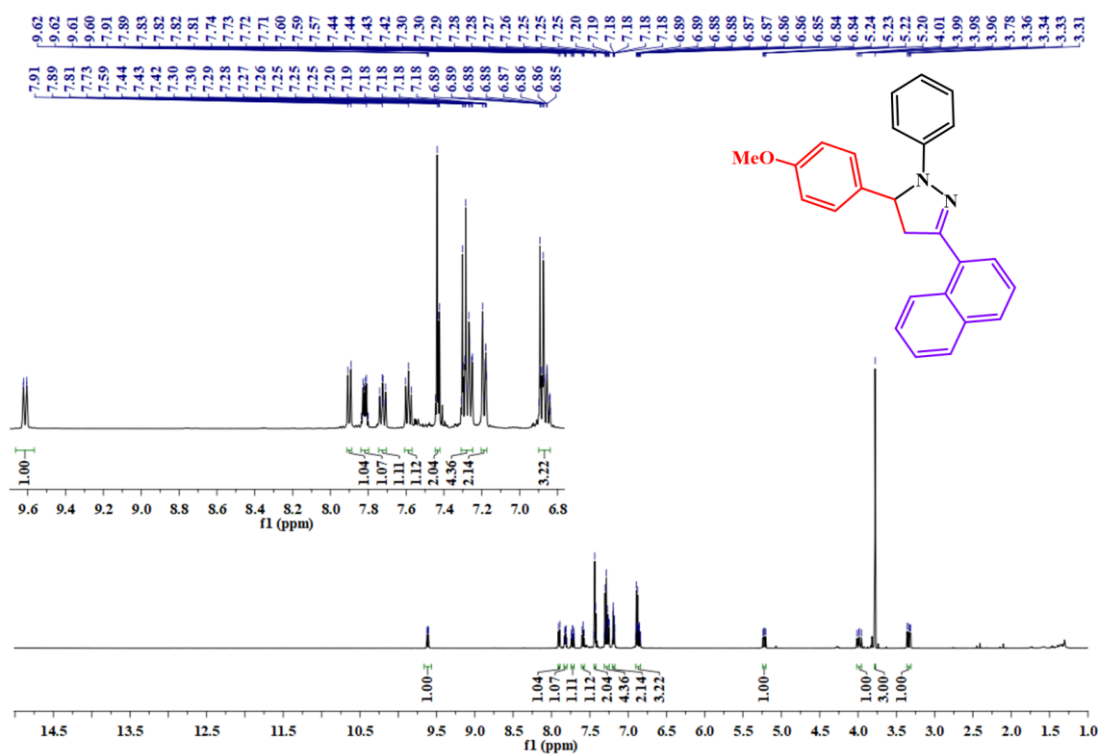

Fig. S90:  $^1\text{H}$  NMR spectrum of **4ae** in  $\text{CDCl}_3$  at 500 MHz.

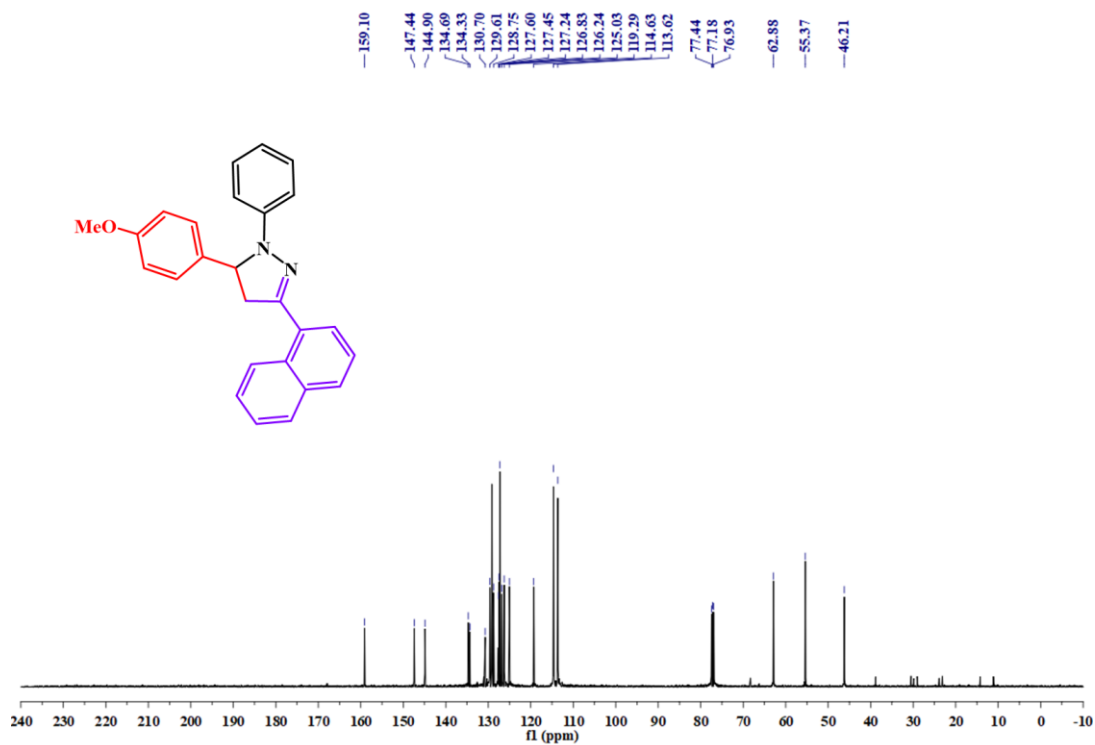

Fig. S91:  $^{13}\text{C}$  NMR spectrum of **4ae** in  $\text{CDCl}_3$  at 126 MHz.

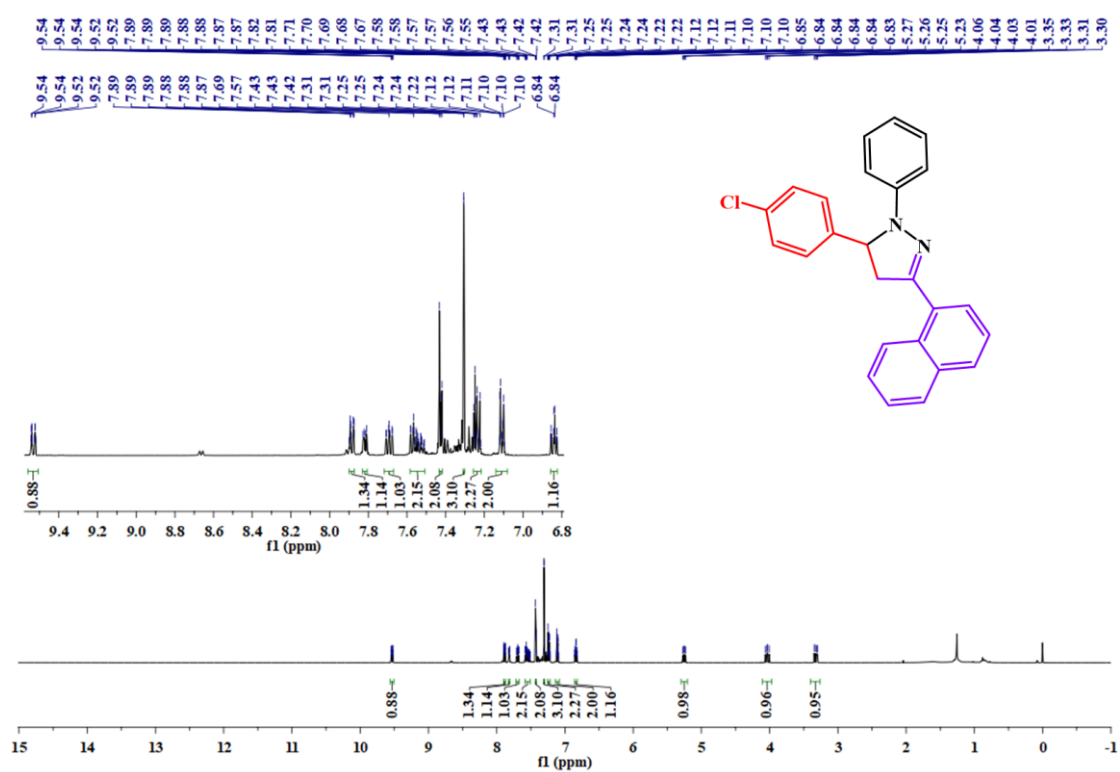

Fig. S92:  $^1\text{H}$  NMR spectrum of **4af** in  $\text{CDCl}_3$  at 500 MHz.

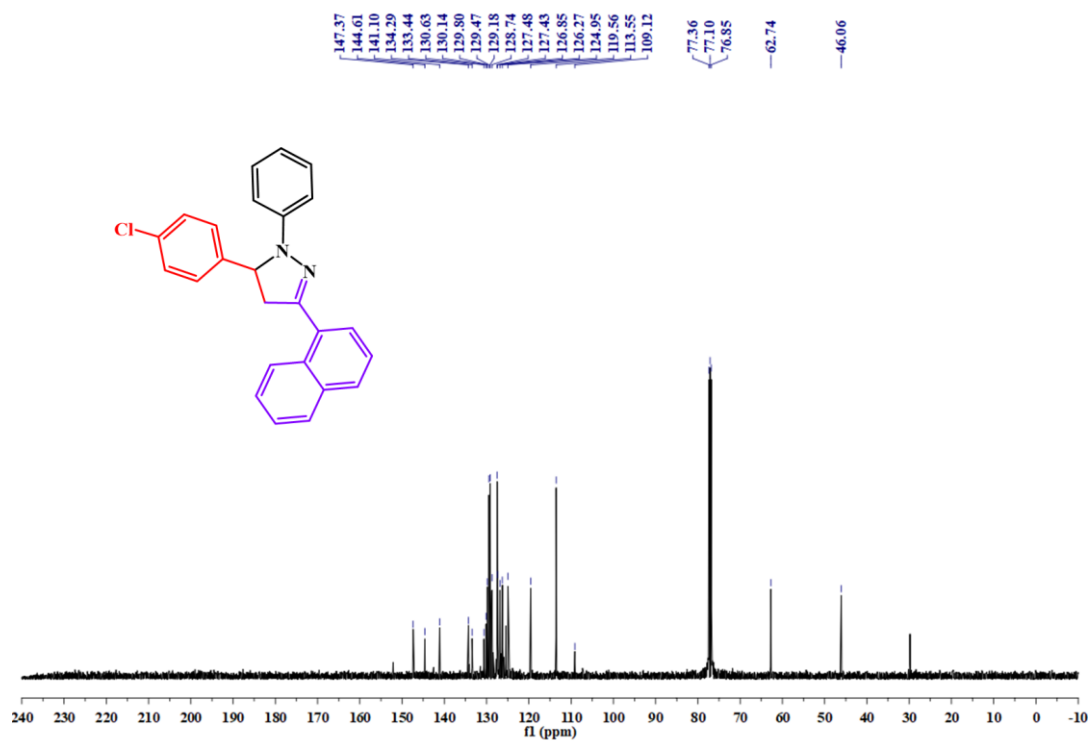

**Fig. S93:**  $^{13}\text{C}$  NMR spectrum of **4af** in  $\text{CDCl}_3$  at 126 MHz.

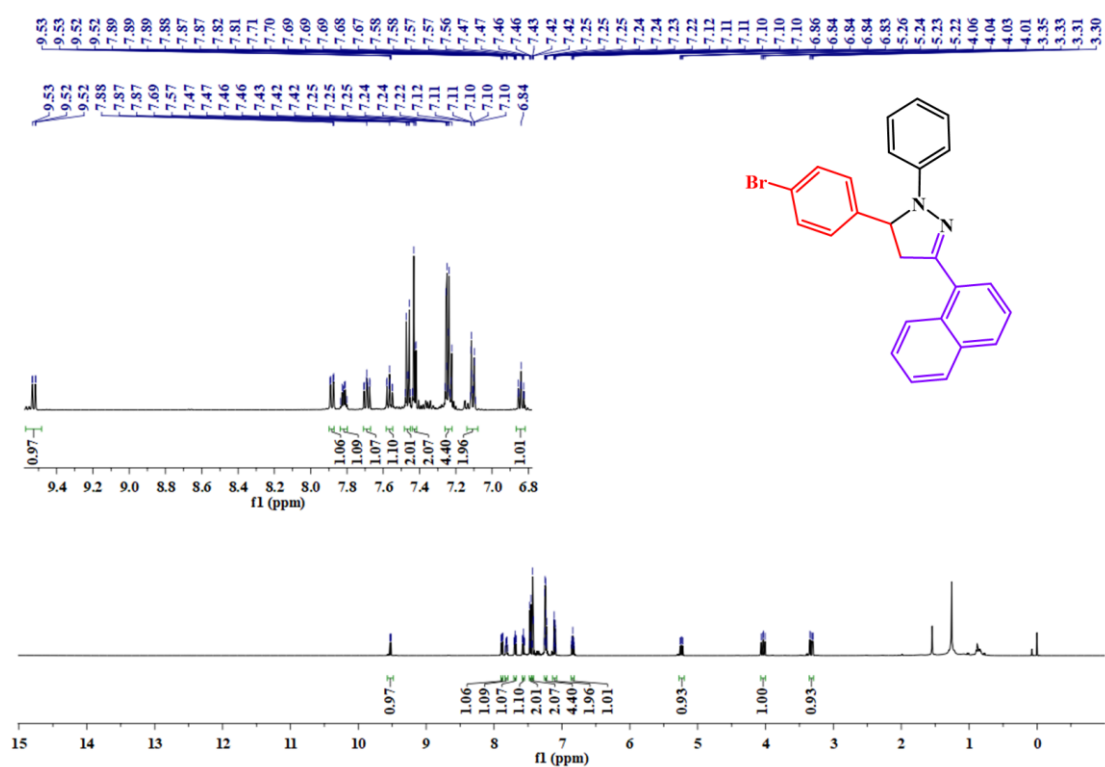

**Fig. S94:**  $^1\text{H}$  NMR spectrum of **4ag** in  $\text{CDCl}_3$  at 500 MHz.

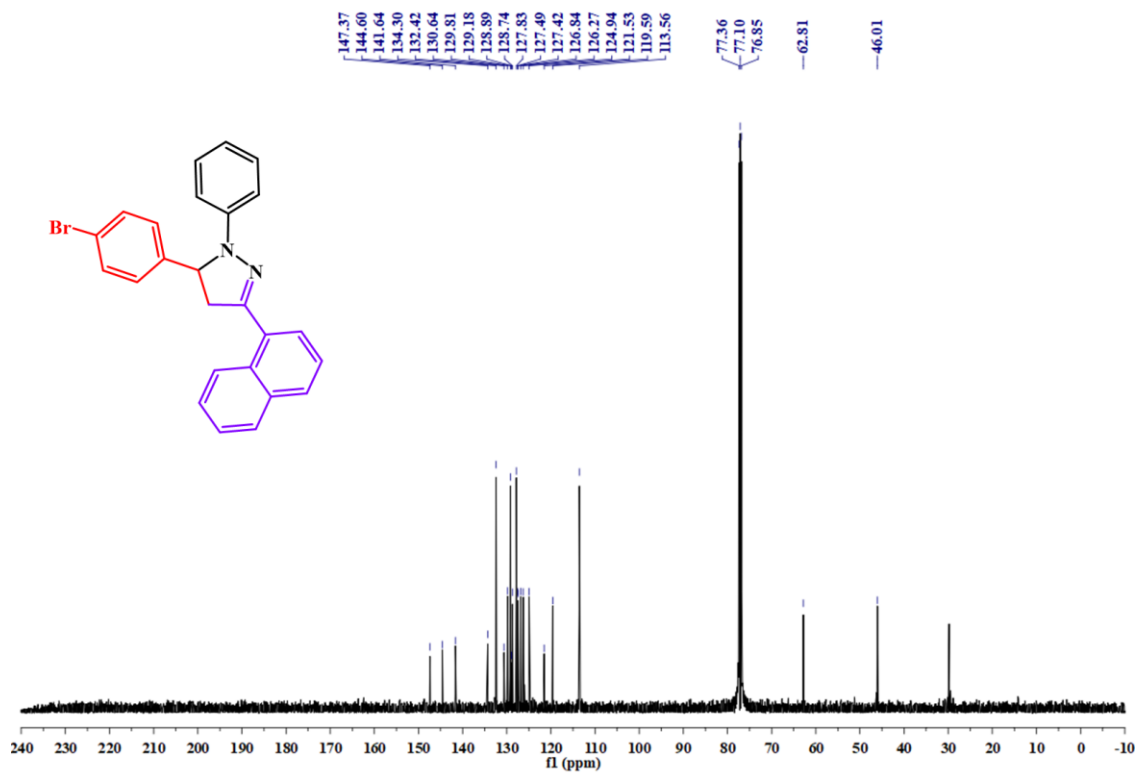

Fig. S95: <sup>13</sup>C NMR spectrum of **4ag** in CDCl<sub>3</sub> at 126 MHz.

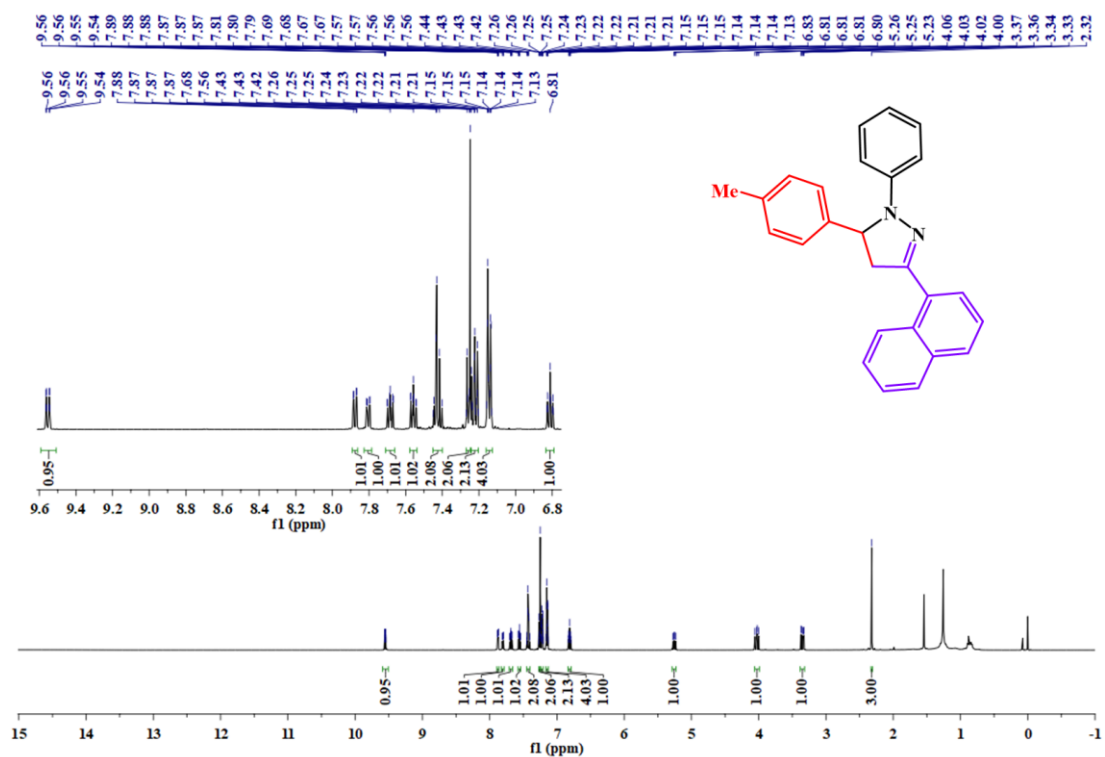

Fig. S96: <sup>1</sup>H NMR spectrum of **4ah** in CDCl<sub>3</sub> at 500 MHz.

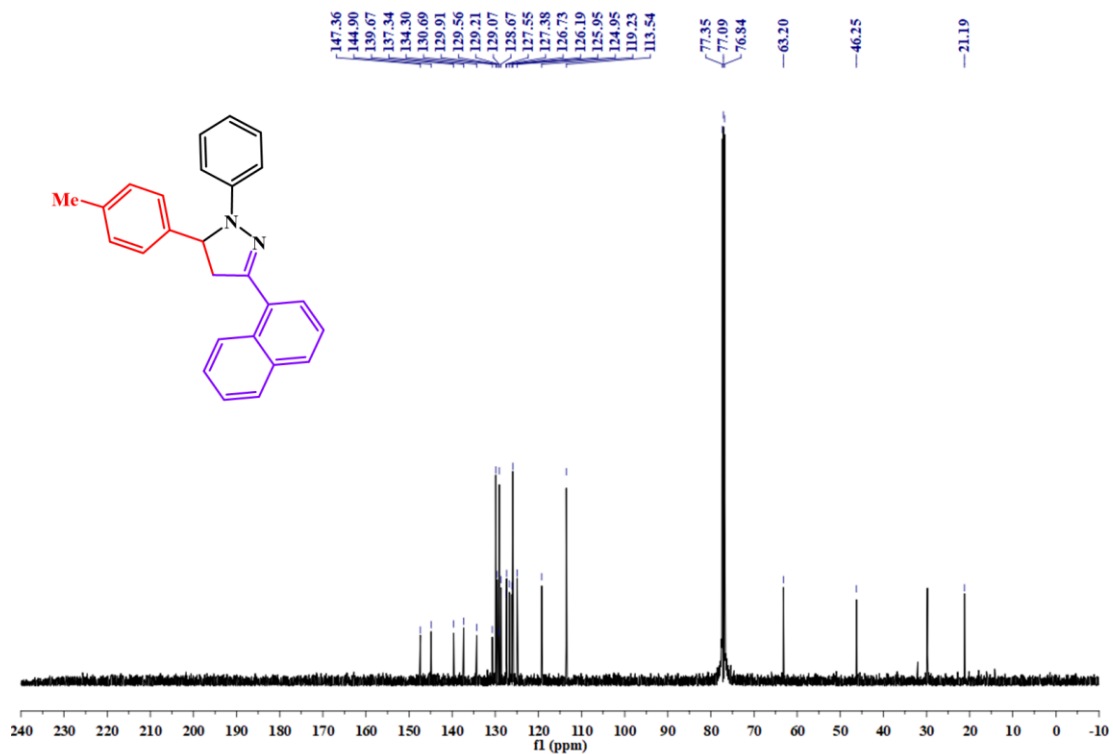







Fig. S101:  $^{13}\text{C}$  NMR spectrum of **4aj** in  $\text{CDCl}_3$  at 126 MHz.

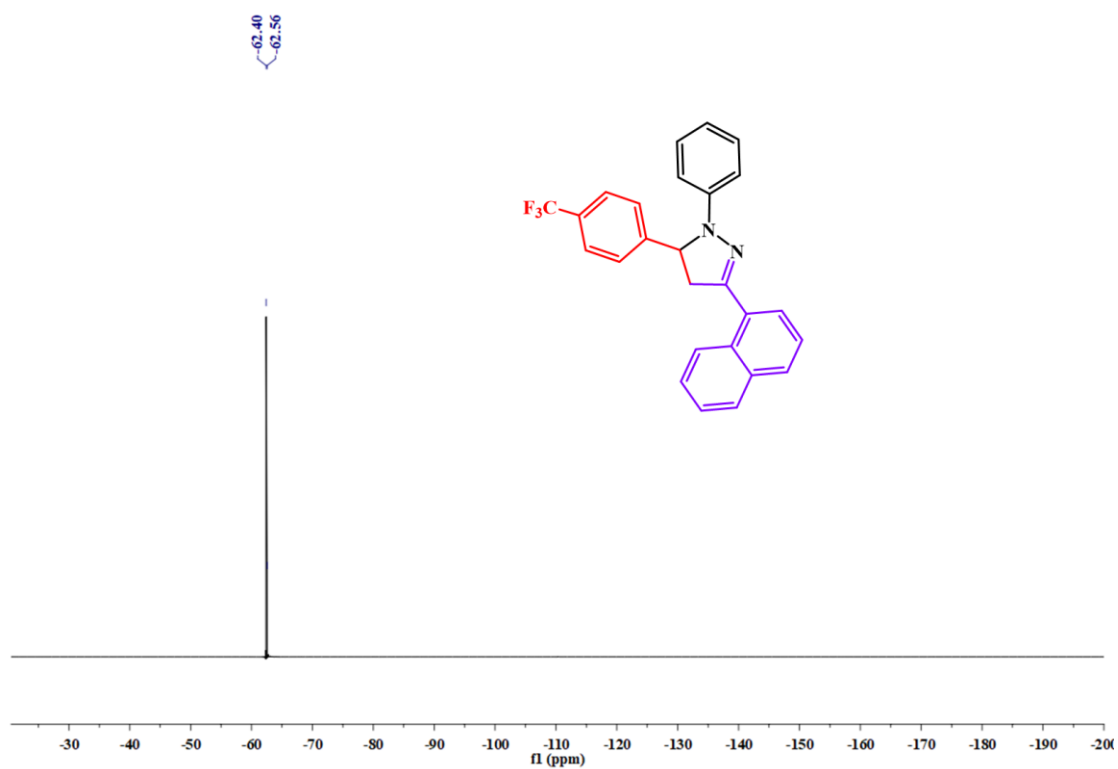

Fig. S102:  $^{19}\text{F}$  NMR spectrum of **4ak** in  $\text{CDCl}_3$  at 471 MHz.

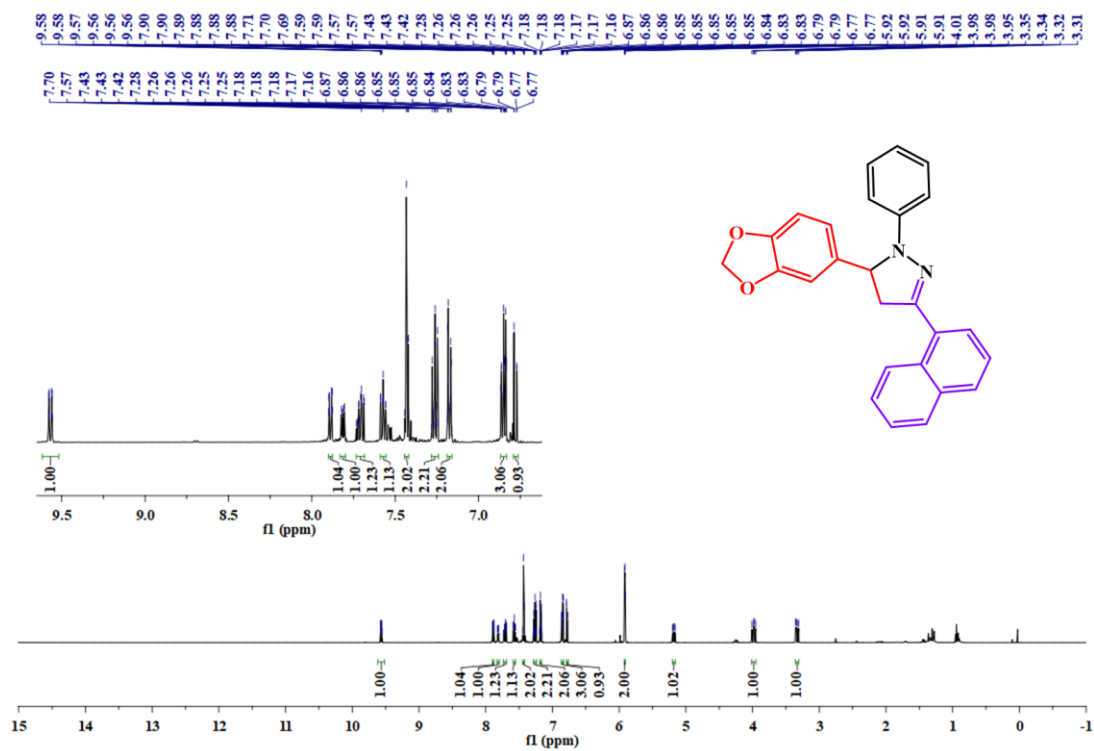

Fig. S103:  $^1\text{H}$  NMR spectrum of **4ak** in  $\text{CDCl}_3$  at 500 MHz.

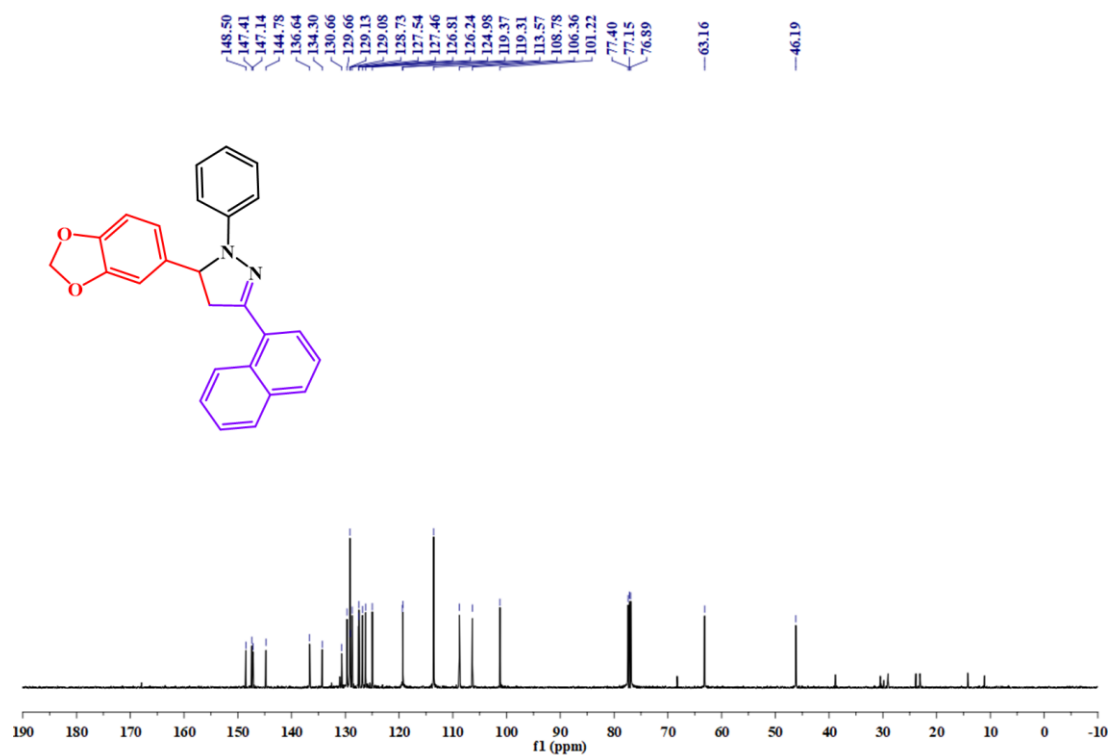

Fig. S104:  $^{13}\text{C}$  NMR spectrum of **4ak** in  $\text{CDCl}_3$  at 126 MHz.

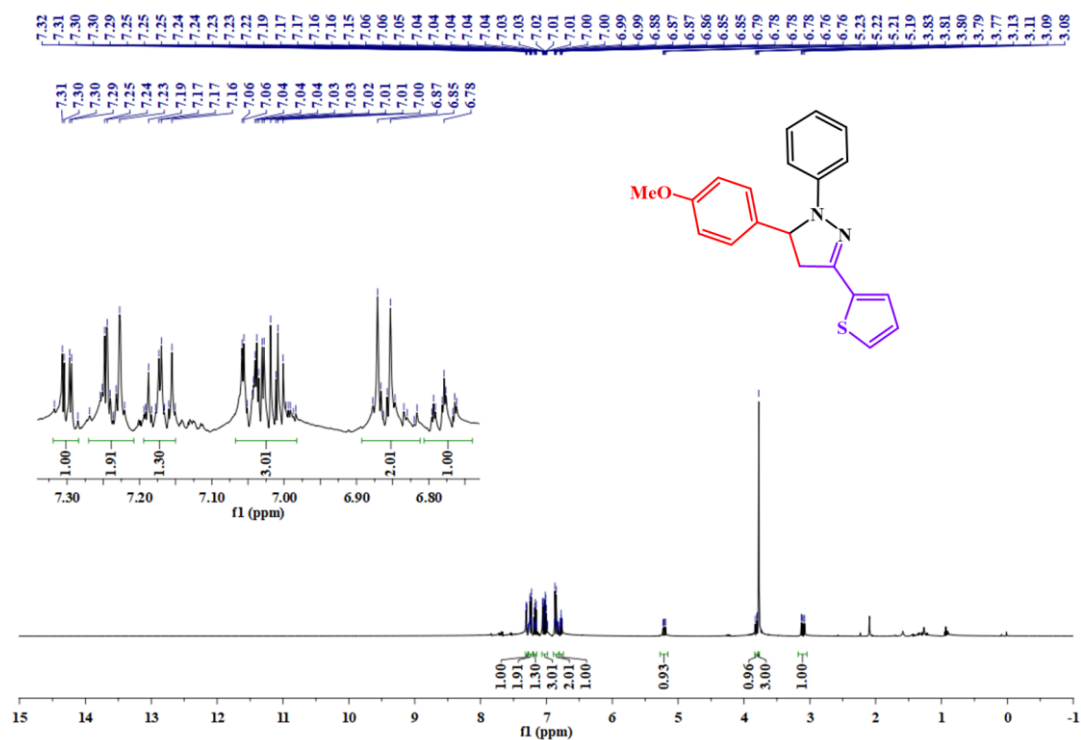

**Fig. S105:**  $^1\text{H}$  NMR spectrum of **4al** in  $\text{CDCl}_3$  at 500 MHz.

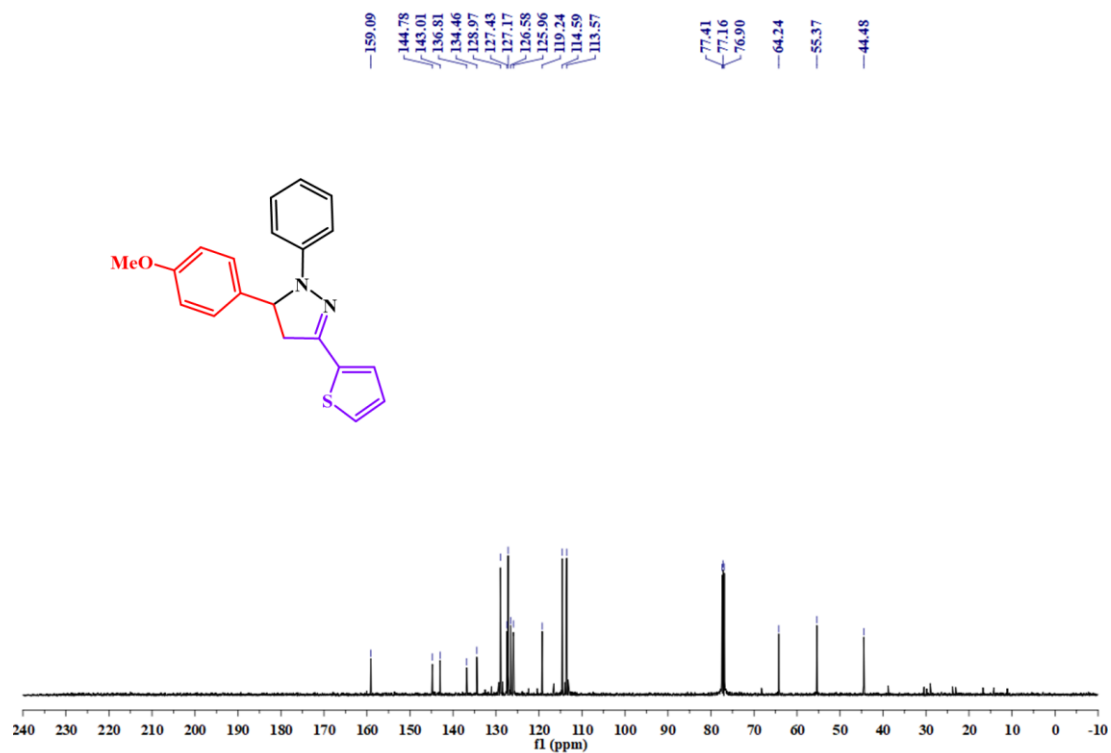

**Fig. S106:**  $^{13}\text{C}$  NMR spectrum of **4al** in  $\text{CDCl}_3$  at 126 MHz.

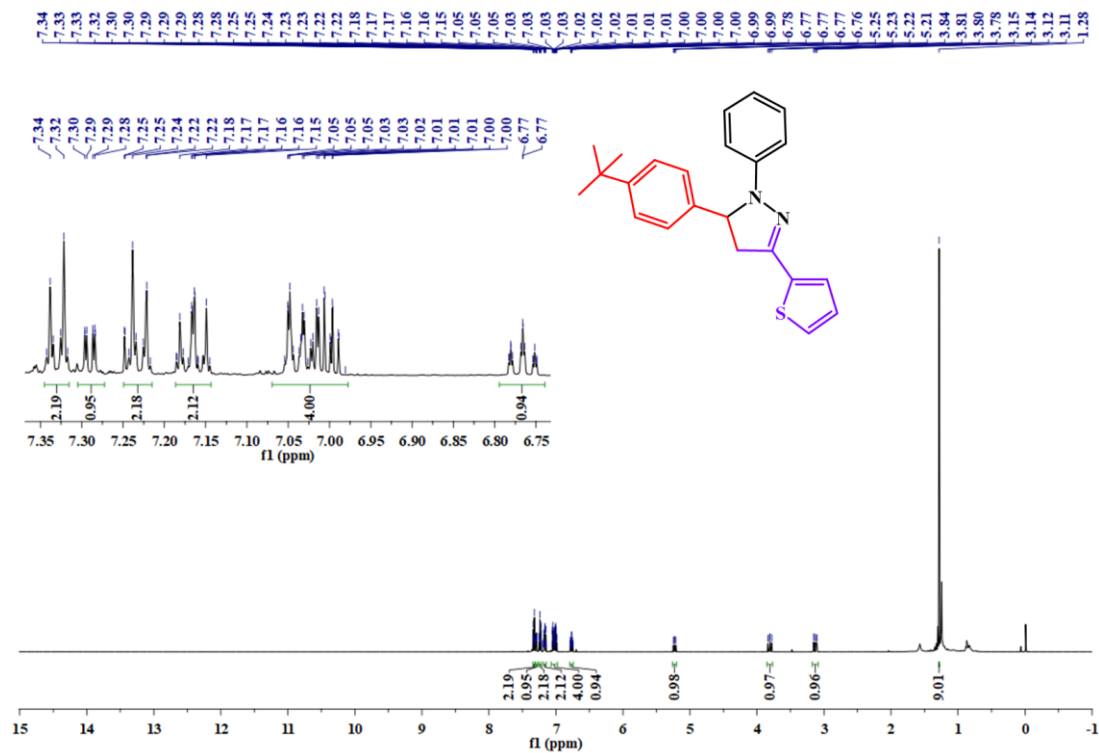

Fig. S107:  $^1\text{H}$  NMR spectrum of **4am** in  $\text{CDCl}_3$  at 500 MHz.

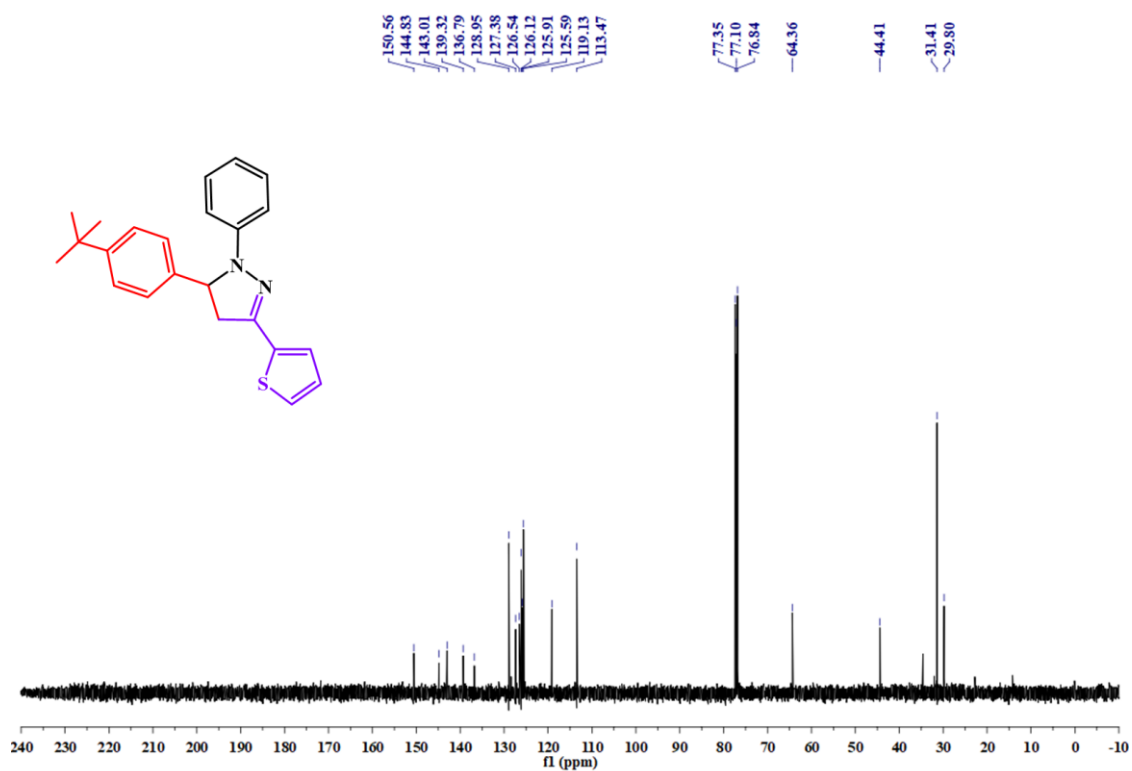

Fig. S108:  $^{13}\text{C}$  NMR spectrum of **4am** in  $\text{CDCl}_3$  at 126 MHz.

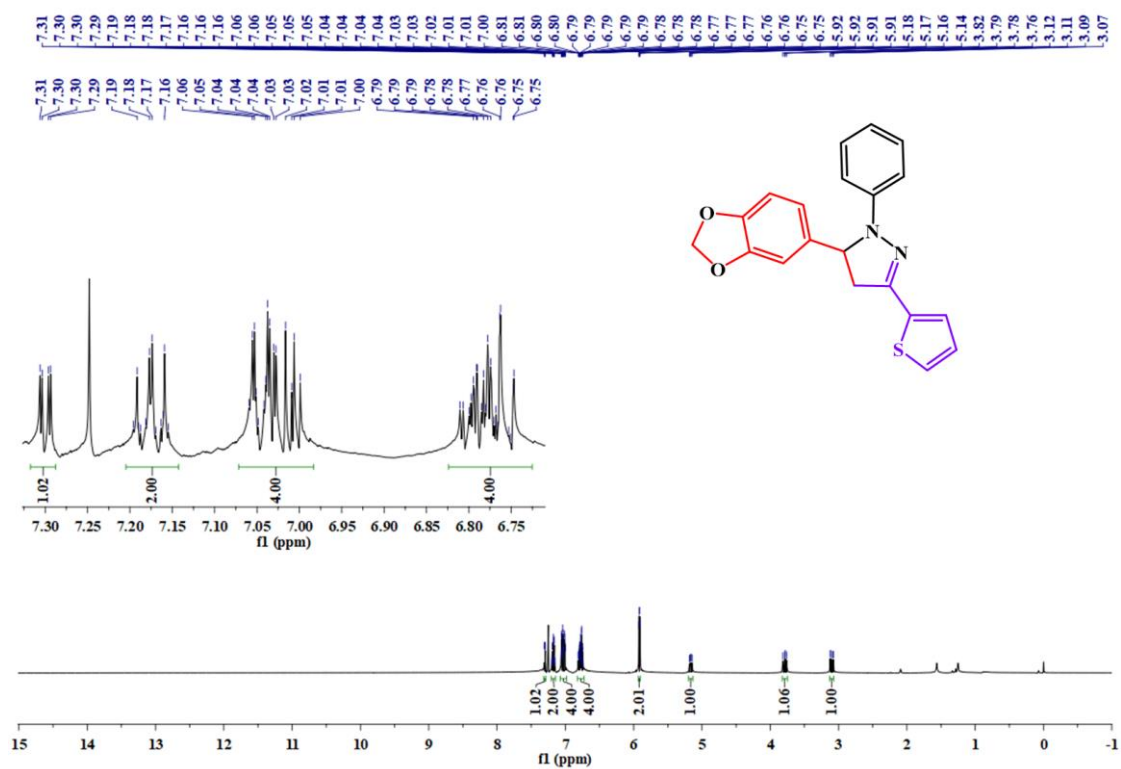

Fig. S109:  $^1\text{H}$  NMR spectrum of **4an** in  $\text{CDCl}_3$  at 500 MHz.

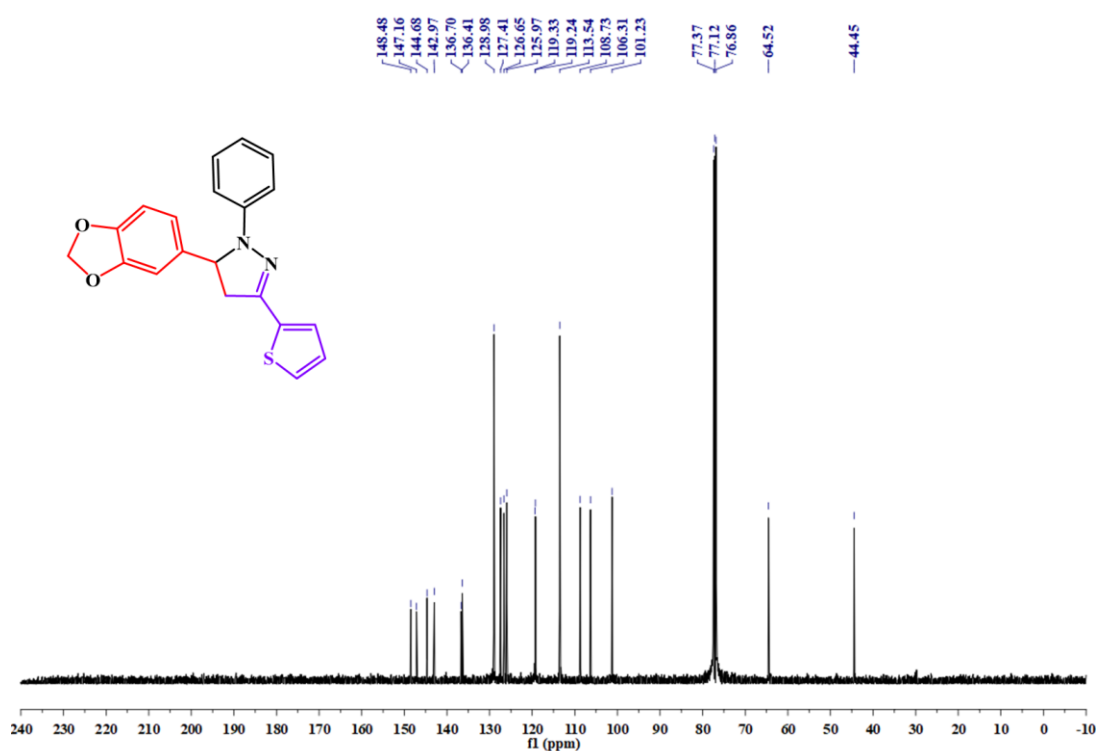

Fig. S110:  $^{13}\text{C}$  NMR spectrum of **4an** in  $\text{CDCl}_3$  at 126 MHz.

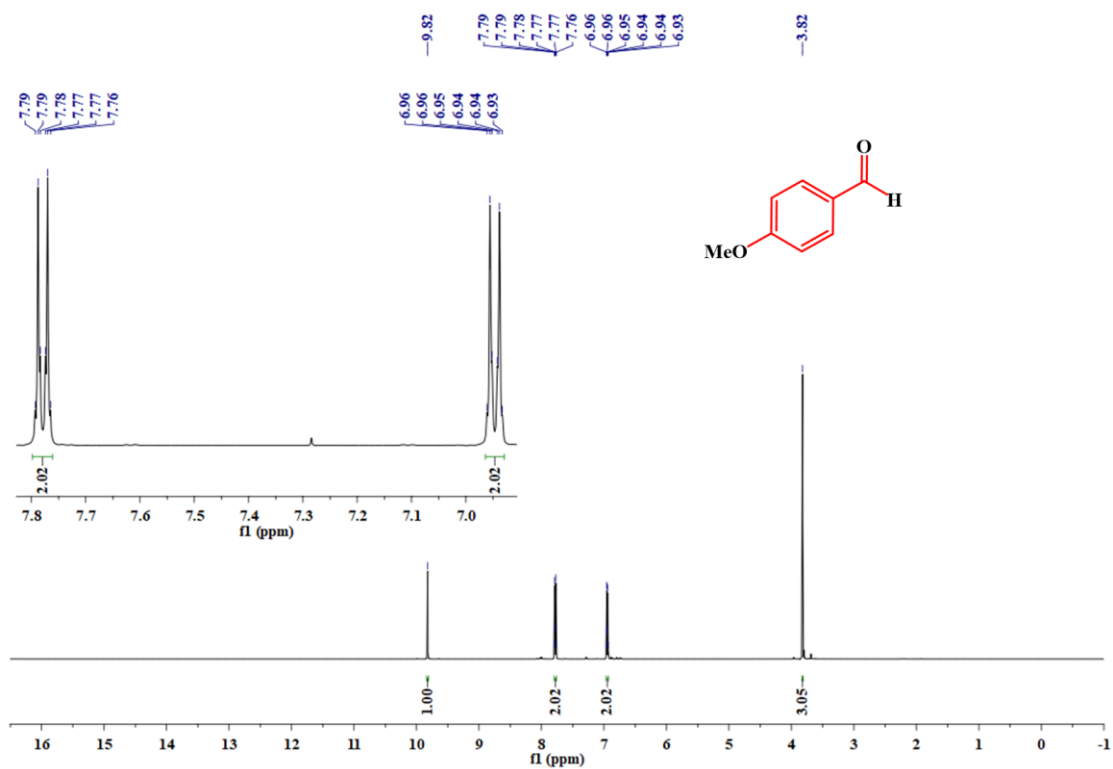

Fig. S111:  $^1\text{H}$  NMR spectrum of **2b** in  $\text{CDCl}_3$  at 500 MHz.

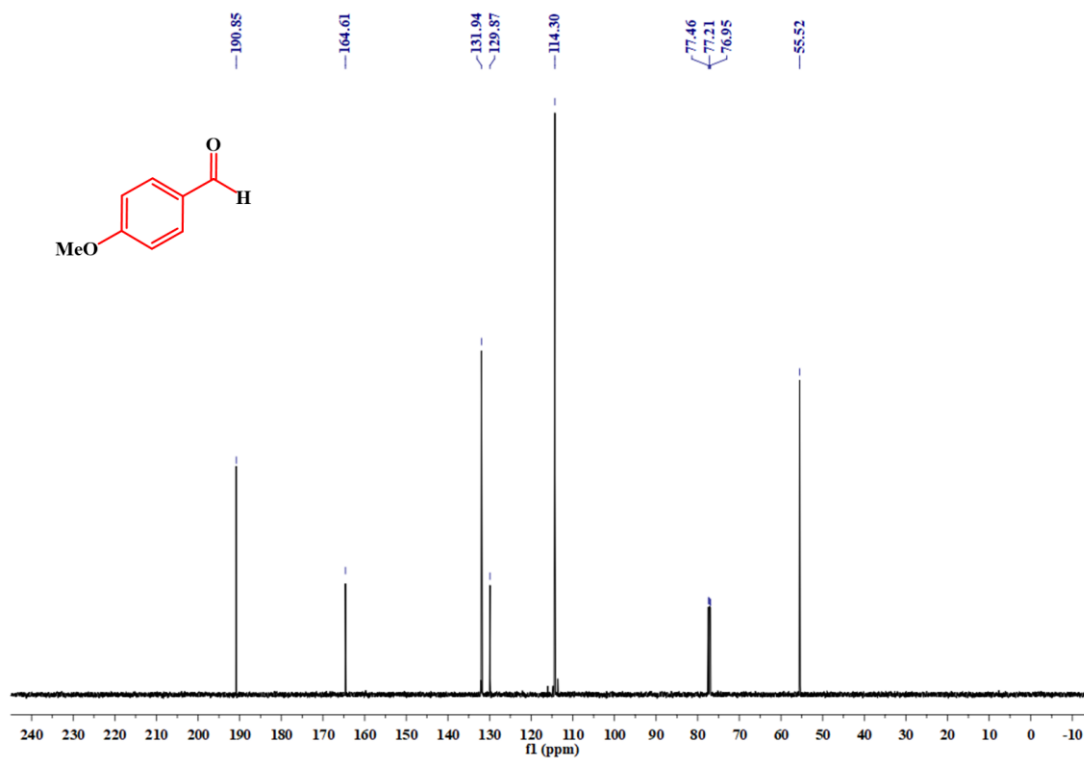

Fig. S112:  $^{13}\text{C}$  NMR spectrum of **2b** in  $\text{CDCl}_3$  at 126 MHz.

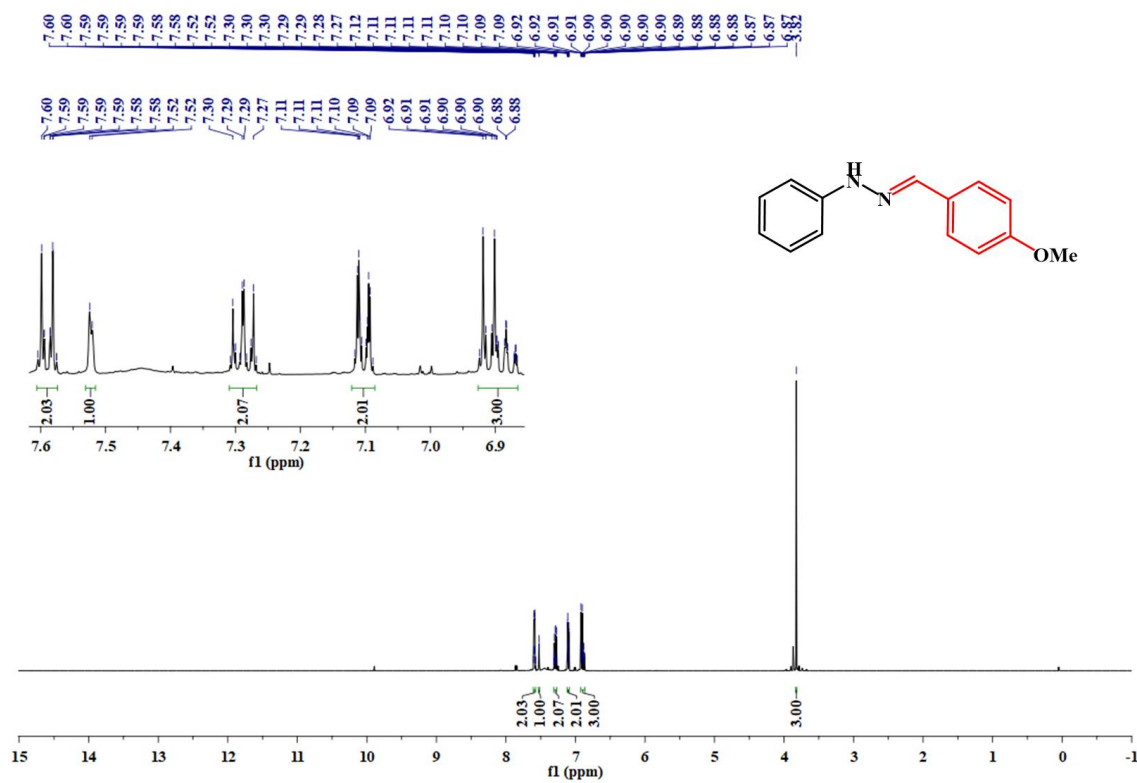

Fig. S113:  $^1\text{H}$  NMR spectrum of **4b** in  $\text{CDCl}_3$  at 500 MHz.

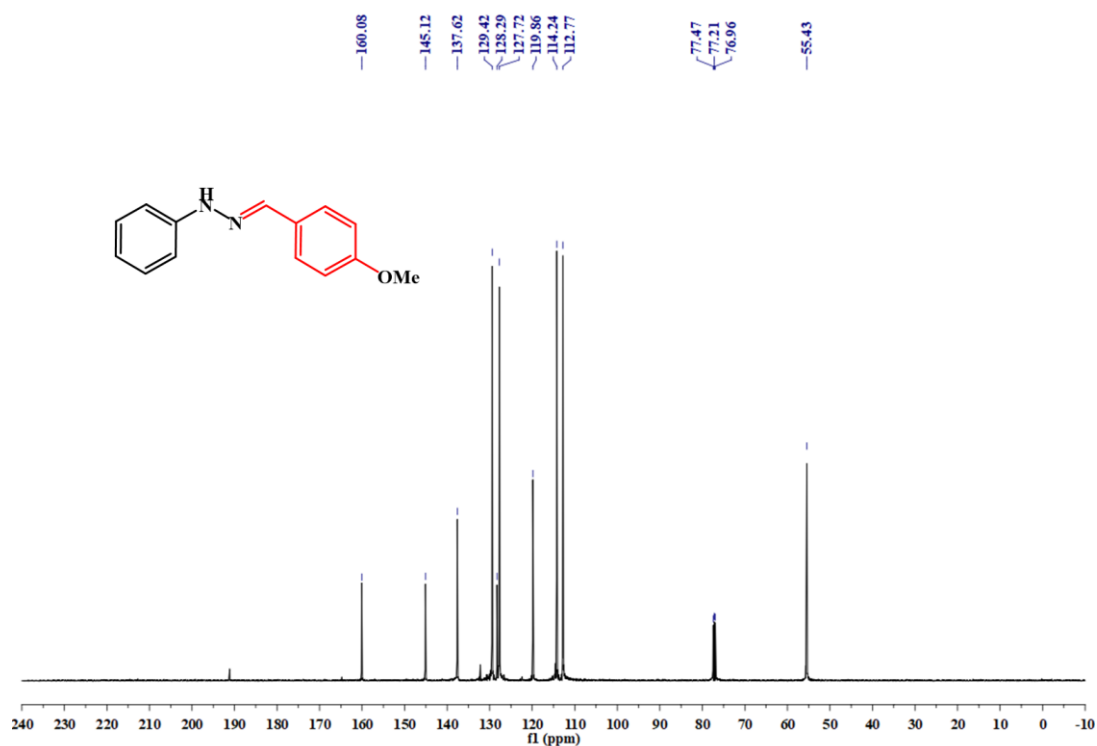

Fig. S114:  $^{13}\text{C}$  NMR spectrum of **4b** in  $\text{CDCl}_3$  at 126 MHz.

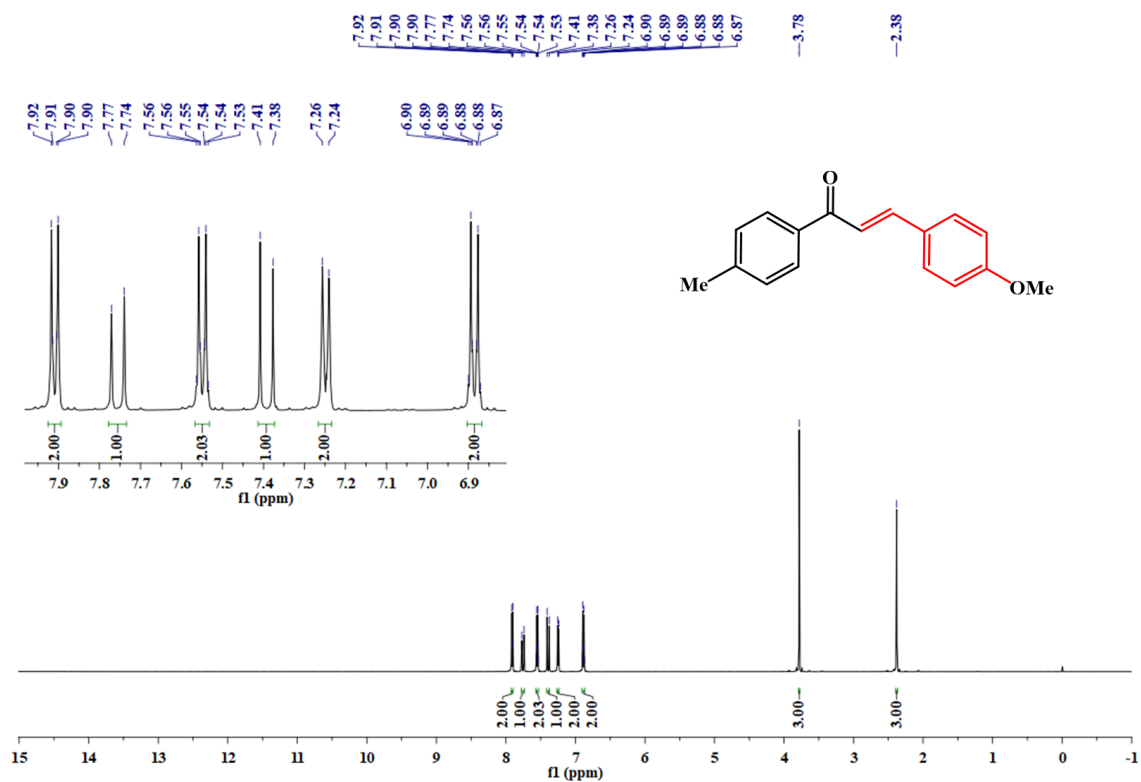



Fig. S115:  $^1\text{H}$  NMR spectrum of **7b** in  $\text{CDCl}_3$  at 500 MHz.

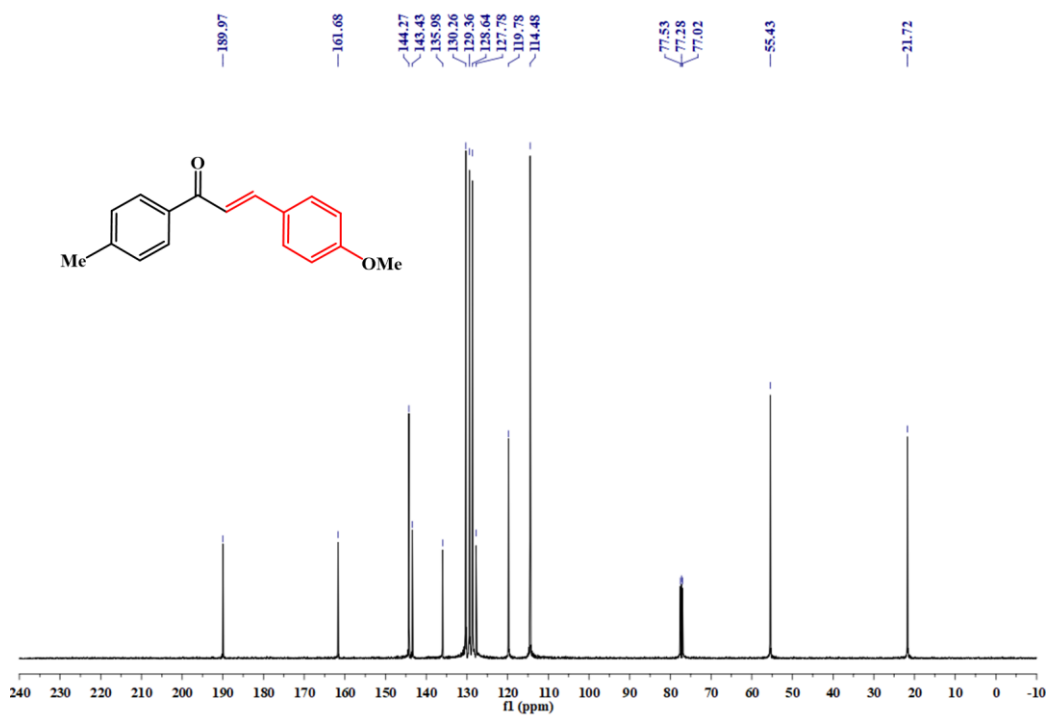

Fig. S116:  $^{13}\text{C}$  NMR spectrum of **7b** in  $\text{CDCl}_3$  at 126 MHz.

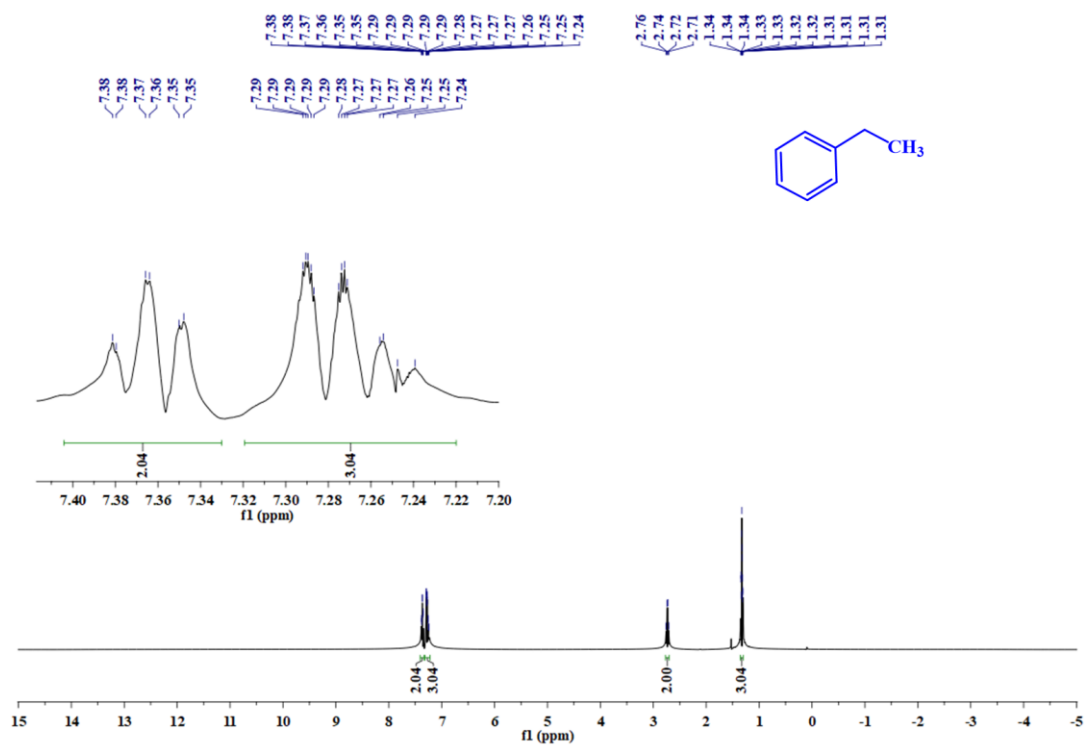

Fig. S117:  $^1\text{H}$  NMR spectrum of **ethyl benzene** in  $\text{CDCl}_3$  at 500 MHz.

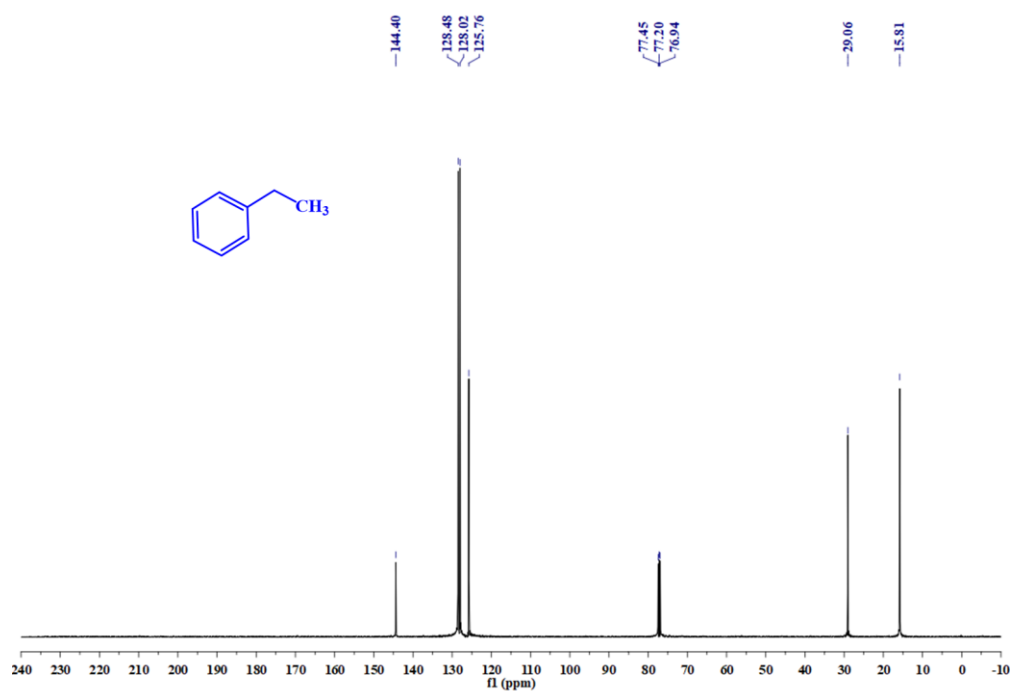

Fig. S118:  $^{13}\text{C}$  NMR spectrum of Ethyl benzene in  $\text{CDCl}_3$  at 126MHz.

## 10. Coordinates for optimized structures ( atomic number, X, Y, Z)

### 10.1 Cartesian coordinates for C1A

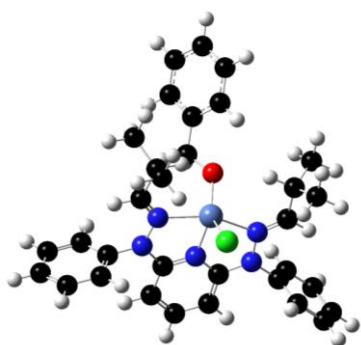

C1A triplet G = -1773.602909, EZPE = -1773.525031

|    |          |           |           |
|----|----------|-----------|-----------|
| 28 | 0.078849 | 0.162559  | 0.596716  |
| 17 | 0.282449 | -0.554671 | 2.904897  |
| 7  | 2.730852 | -0.864080 | -0.302689 |
| 7  | 0.495410 | -1.535738 | -0.356483 |

|   |          |           |           |
|---|----------|-----------|-----------|
| 7 | 2.232388 | 0.300313  | 0.334912  |
| 6 | 4.144150 | -1.066967 | -0.526108 |
| 6 | 4.922945 | -1.690122 | 0.469039  |
| 1 | 4.450532 | -2.018180 | 1.391240  |
| 6 | 6.300722 | -1.879331 | 0.254252  |
| 1 | 6.904710 | -2.361937 | 1.017865  |
| 6 | 6.894705 | -1.444359 | -0.948026 |
| 1 | 7.959119 | -1.591807 | -1.111841 |
| 6 | 6.110547 | -0.817425 | -1.937510 |
| 1 | 6.568144 | -0.480980 | -2.863977 |
| 6 | 4.732169 | -0.625364 | -1.727485 |
| 1 | 4.115079 | -0.141860 | -2.480361 |
| 6 | 1.783463 | -1.826089 | -0.658461 |
| 6 | 3.040589 | 1.247604  | 0.694645  |
| 1 | 4.117867 | 1.171277  | 0.524302  |
| 6 | 2.546370 | 2.495261  | 1.383391  |
| 1 | 1.452182 | 2.491343  | 1.357112  |
| 6 | 3.025312 | 2.495879  | 2.859568  |
| 1 | 2.673248 | 3.405218  | 3.363954  |
| 1 | 4.122805 | 2.477040  | 2.923837  |
| 1 | 2.625121 | 1.627761  | 3.394725  |
| 6 | 2.120248 | -3.043811 | -1.290911 |
| 1 | 3.146676 | -3.282977 | -1.535270 |
| 6 | 1.072772 | -3.933223 | -1.581753 |
| 1 | 1.300210 | -4.878170 | -2.067780 |
| 6 | 3.052893 | 3.745840  | 0.621274  |
| 1 | 2.713293 | 4.656508  | 1.130970  |

|   |           |           |           |
|---|-----------|-----------|-----------|
| 1 | 2.665065  | 3.764321  | -0.403969 |
| 1 | 4.151461  | 3.772176  | 0.581894  |
| 7 | -1.792114 | -1.990906 | -0.227007 |
| 7 | -1.880632 | -0.727216 | 0.411201  |
| 6 | -2.935315 | -2.868748 | -0.336777 |
| 6 | -3.757310 | -2.806706 | -1.478524 |
| 1 | -3.519111 | -2.104208 | -2.272944 |
| 6 | -4.873082 | -3.659130 | -1.577758 |
| 1 | -5.508453 | -3.617661 | -2.458388 |
| 6 | -5.163737 | -4.564988 | -0.537714 |
| 1 | -6.025647 | -5.222615 | -0.616131 |
| 6 | -4.338427 | -4.619442 | 0.604085  |
| 1 | -4.562058 | -5.317570 | 1.406175  |
| 6 | -3.222052 | -3.769500 | 0.708321  |
| 1 | -2.577005 | -3.798392 | 1.582629  |
| 6 | -0.512974 | -2.399262 | -0.621036 |
| 6 | -3.019049 | -0.303883 | 0.869679  |
| 1 | -3.924150 | -0.910618 | 0.783730  |
| 6 | -3.154814 | 1.022103  | 1.577820  |
| 1 | -2.226056 | 1.588177  | 1.442041  |
| 6 | -4.333098 | 1.827010  | 0.973294  |
| 1 | -4.439948 | 2.782563  | 1.500939  |
| 1 | -5.280036 | 1.277349  | 1.073809  |
| 1 | -4.169926 | 2.047352  | -0.088542 |
| 6 | -0.261294 | -3.635859 | -1.253910 |
| 1 | -1.063225 | -4.328703 | -1.471369 |
| 6 | -3.370215 | 0.770801  | 3.095658  |

|   |           |          |           |
|---|-----------|----------|-----------|
| 1 | -3.486784 | 1.730766 | 3.615179  |
| 1 | -2.509410 | 0.245819 | 3.523102  |
| 1 | -4.277788 | 0.176529 | 3.274045  |
| 6 | -1.529738 | 3.538235 | -1.487733 |
| 6 | -2.394548 | 4.000806 | -2.506479 |
| 6 | -1.035411 | 4.462768 | -0.546835 |
| 6 | -2.758790 | 5.358156 | -2.581713 |
| 1 | -2.781672 | 3.298205 | -3.244732 |
| 6 | -1.398584 | 5.823333 | -0.617394 |
| 1 | -0.369145 | 4.094325 | 0.226709  |
| 6 | -2.261005 | 6.277556 | -1.634281 |
| 1 | -3.424271 | 5.698864 | -3.372604 |
| 1 | -1.009279 | 6.525584 | 0.117399  |
| 1 | -2.540840 | 7.327374 | -1.690370 |
| 8 | -0.210554 | 1.779459 | -0.377826 |
| 6 | -1.143886 | 2.058449 | -1.416255 |
| 1 | -0.720122 | 1.773941 | -2.400630 |
| 1 | -2.078257 | 1.471103 | -1.307142 |

## 10.2 Cartesian coordinates for C2A

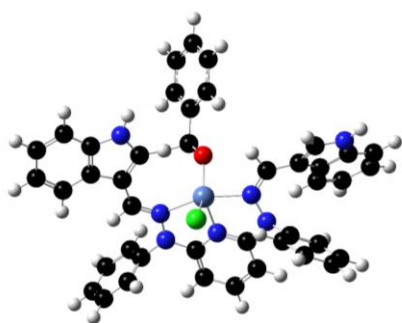

**C2A triplet G = -2262.845374 EZPE = -2262.759713**

|    |           |           |          |
|----|-----------|-----------|----------|
| 28 | -0.218972 | -0.136711 | 0.500115 |
|----|-----------|-----------|----------|

|    |           |           |           |
|----|-----------|-----------|-----------|
| 17 | -0.465767 | -0.968657 | 2.760723  |
| 7  | 1.884674  | -0.005879 | 0.619572  |
| 7  | -3.848582 | 2.580556  | 1.836908  |
| 1  | -3.540297 | 3.468434  | 2.210961  |
| 7  | -2.123126 | -0.936064 | -0.189609 |
| 7  | 0.370579  | -1.761445 | -0.489803 |
| 7  | -1.892353 | -2.129338 | -0.939860 |
| 7  | 2.553983  | -1.192518 | 0.181835  |
| 7  | 5.945591  | 2.448381  | 1.098516  |
| 1  | 6.665758  | 2.986811  | 1.560782  |
| 6  | -5.159021 | 0.825613  | 1.218183  |
| 6  | -5.160994 | 2.090391  | 1.883808  |
| 6  | -6.322034 | 2.650212  | 2.444648  |
| 1  | -6.303533 | 3.612722  | 2.949490  |
| 6  | -7.513454 | 1.915680  | 2.330336  |
| 1  | -8.432683 | 2.315293  | 2.751537  |
| 6  | -7.535721 | 0.655047  | 1.674647  |
| 1  | -8.474046 | 0.109863  | 1.606184  |
| 6  | -6.370012 | 0.103091  | 1.120889  |
| 1  | -6.408713 | -0.867164 | 0.631253  |
| 6  | -3.788548 | 0.578323  | 0.777645  |
| 6  | -3.030887 | 1.685708  | 1.180139  |
| 1  | -1.981044 | 1.888689  | 0.997350  |
| 6  | -3.368366 | -0.598986 | 0.060213  |
| 1  | -4.175955 | -1.248722 | -0.278935 |
| 6  | -0.570801 | -2.563525 | -1.043105 |
| 6  | -0.204265 | -3.784603 | -1.656389 |

|   |           |           |           |
|---|-----------|-----------|-----------|
| 1 | -0.944852 | -4.424691 | -2.116968 |
| 6 | 1.151219  | -4.146185 | -1.621339 |
| 1 | 1.461029  | -5.083934 | -2.074594 |
| 6 | 2.117012  | -3.328205 | -1.007435 |
| 1 | 3.157429  | -3.620167 | -0.967368 |
| 6 | 1.678009  | -2.113468 | -0.446231 |
| 6 | -2.980713 | -2.940169 | -1.439734 |
| 6 | -3.491431 | -2.699260 | -2.729956 |
| 1 | -3.060309 | -1.907382 | -3.336734 |
| 6 | -4.550093 | -3.488707 | -3.217117 |
| 1 | -4.945300 | -3.307650 | -4.213084 |
| 6 | -5.094669 | -4.511944 | -2.414990 |
| 1 | -5.911813 | -5.120890 | -2.793096 |
| 6 | -4.581166 | -4.746073 | -1.122937 |
| 1 | -5.000559 | -5.534179 | -0.503444 |
| 6 | -3.523690 | -3.958712 | -0.631094 |
| 1 | -3.118728 | -4.125714 | 0.363665  |
| 6 | 3.607177  | -1.729451 | 1.047688  |
| 6 | 3.324524  | -1.894290 | 2.420510  |
| 1 | 2.349640  | -1.602377 | 2.806501  |
| 6 | 4.305252  | -2.443931 | 3.263865  |
| 1 | 4.090724  | -2.573619 | 4.321621  |
| 6 | 5.552284  | -2.843606 | 2.739654  |
| 1 | 6.305517  | -3.275342 | 3.394258  |
| 6 | 5.817546  | -2.685265 | 1.366055  |
| 1 | 6.777361  | -2.989125 | 0.955935  |
| 6 | 4.846119  | -2.122595 | 0.516128  |

|   |           |           |           |
|---|-----------|-----------|-----------|
| 1 | 5.056035  | -1.974606 | -0.537937 |
| 6 | 2.550087  | 1.083678  | 0.895409  |
| 1 | 1.908161  | 1.860998  | 1.304446  |
| 6 | 3.955988  | 1.420742  | 0.708868  |
| 6 | 4.840073  | 1.154272  | -0.420773 |
| 6 | 6.079580  | 1.810193  | -0.140624 |
| 6 | 4.670118  | 2.235796  | 1.588541  |
| 1 | 4.352843  | 2.652574  | 2.533684  |
| 6 | 4.681321  | 0.497451  | -1.663657 |
| 1 | 3.741312  | 0.017224  | -1.915959 |
| 6 | 5.757070  | 0.481801  | -2.563057 |
| 1 | 5.647778  | -0.017725 | -3.522658 |
| 6 | 6.991424  | 1.114630  | -2.249134 |
| 1 | 7.806507  | 1.083019  | -2.967980 |
| 6 | 7.166774  | 1.792913  | -1.033385 |
| 1 | 8.102117  | 2.295491  | -0.800326 |
| 8 | -0.284249 | 1.620774  | -0.282445 |
| 6 | -0.911692 | 3.577311  | -1.634568 |
| 6 | -1.622861 | 4.197042  | -2.687950 |
| 6 | -0.168858 | 4.385840  | -0.751226 |
| 6 | -1.588781 | 5.593785  | -2.857025 |
| 1 | -2.206063 | 3.585791  | -3.376630 |
| 6 | -0.133251 | 5.785897  | -0.915568 |
| 1 | 0.371743  | 3.895965  | 0.052593  |
| 6 | -0.841829 | 6.396233  | -1.968976 |
| 1 | -2.141722 | 6.055403  | -3.672778 |
| 1 | 0.446558  | 6.397195  | -0.226294 |



|   |           |          |           |
|---|-----------|----------|-----------|
| 1 | -0.814720 | 7.476238 | -2.097390 |
| 6 | -0.947117 | 2.055823 | -1.467990 |
| 1 | -2.009045 | 1.737168 | -1.492587 |
| 1 | -0.471173 | 1.606439 | -2.362152 |

### 10.3 Cartesian coordinates for C1B

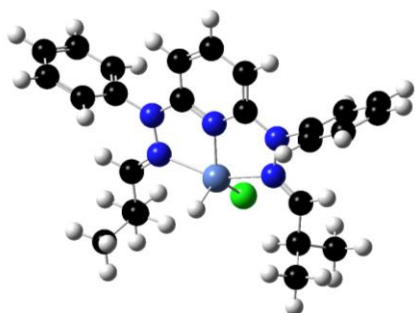

**C1B triplet G = -1428.126648 EZPE = -1428.058615**

|    |           |           |           |
|----|-----------|-----------|-----------|
| 28 | 0.000153  | 1.064703  | 0.140053  |
| 17 | -0.000709 | 2.689223  | -1.653659 |
| 7  | -2.333708 | -0.815168 | 0.007294  |
| 7  | 0.000071  | -0.943046 | 0.012081  |
| 7  | -2.134521 | 0.588713  | 0.090368  |
| 6  | -3.654765 | -1.402128 | 0.012188  |
| 6  | -4.344674 | -1.577233 | -1.203414 |
| 1  | -3.873563 | -1.274143 | -2.134764 |
| 6  | -5.633149 | -2.143310 | -1.195488 |
| 1  | -6.167748 | -2.282549 | -2.131258 |
| 6  | -6.227509 | -2.529109 | 0.023148  |
| 1  | -7.222651 | -2.966361 | 0.027072  |
| 6  | -5.533604 | -2.347439 | 1.236739  |
| 1  | -5.991599 | -2.644081 | 2.176512  |
| 6  | -4.245441 | -1.780858 | 1.233963  |

|   |           |           |           |
|---|-----------|-----------|-----------|
| 1 | -3.698419 | -1.633611 | 2.161604  |
| 6 | -1.182203 | -1.604141 | -0.043838 |
| 6 | -3.159268 | 1.377628  | 0.210118  |
| 1 | -4.178030 | 0.981272  | 0.242076  |
| 6 | -3.015527 | 2.872938  | 0.338066  |
| 1 | -1.953498 | 3.127504  | 0.278856  |
| 6 | -3.750642 | 3.572435  | -0.833613 |
| 1 | -3.670425 | 4.661463  | -0.724191 |
| 1 | -4.818534 | 3.310381  | -0.852851 |
| 1 | -3.298945 | 3.294459  | -1.792284 |
| 6 | -1.225784 | -3.012511 | -0.148855 |
| 1 | -2.167921 | -3.542303 | -0.193272 |
| 6 | 0.000024  | -3.696295 | -0.198284 |
| 1 | -0.000009 | -4.779859 | -0.280592 |
| 6 | -3.578606 | 3.326176  | 1.710978  |
| 1 | -3.480452 | 4.414741  | 1.809857  |
| 1 | -3.029356 | 2.857432  | 2.536437  |
| 1 | -4.643719 | 3.072345  | 1.811293  |
| 7 | 2.333821  | -0.815152 | 0.006505  |
| 7 | 2.134546  | 0.588693  | 0.089411  |
| 6 | 3.654892  | -1.402033 | 0.011999  |
| 6 | 4.245170  | -1.780544 | 1.234027  |
| 1 | 3.697853  | -1.633190 | 2.161478  |
| 6 | 5.533406  | -2.346971 | 1.237367  |
| 1 | 5.991061  | -2.643397 | 2.177372  |
| 6 | 6.227798  | -2.528671 | 0.024068  |
| 1 | 7.222982  | -2.965823 | 0.028374  |

|   |          |           |           |
|---|----------|-----------|-----------|
| 6 | 5.633796 | -2.143186 | -1.194852 |
| 1 | 6.168732 | -2.282616 | -2.130402 |
| 6 | 4.345265 | -1.577269 | -1.203338 |
| 1 | 3.874402 | -1.274408 | -2.134891 |
| 6 | 1.182308 | -1.604158 | -0.044222 |
| 6 | 3.159203 | 1.377650  | 0.209696  |
| 1 | 4.177957 | 0.981300  | 0.242287  |
| 6 | 3.015420 | 2.872972  | 0.337451  |
| 1 | 1.953419 | 3.127557  | 0.277831  |
| 6 | 3.578001 | 3.326327  | 1.710509  |
| 1 | 3.479798 | 4.414896  | 1.809308  |
| 1 | 4.643084 | 3.072521  | 1.811231  |
| 1 | 3.028462 | 2.857631  | 2.535806  |
| 6 | 1.225846 | -3.012521 | -0.149378 |
| 1 | 2.167976 | -3.542281 | -0.194353 |
| 6 | 3.750947 | 3.572375  | -0.834044 |
| 1 | 3.670774 | 4.661408  | -0.724649 |
| 1 | 3.299510 | 3.294418  | -1.792840 |
| 1 | 4.818818 | 3.310230  | -0.852971 |
| 1 | 0.000918 | 1.407574  | 1.717075  |

#### 10.4 Cartesian coordinates for C2B

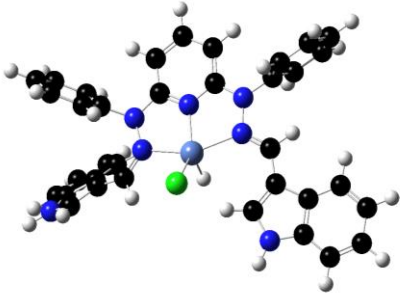

C2B triplet G = -1917.366632 EZPE = -1917.292274

|    |           |           |           |
|----|-----------|-----------|-----------|
| 28 | 0.296903  | -0.473309 | 0.525882  |
| 17 | 0.498570  | -1.812198 | 2.543607  |
| 7  | -1.839589 | -0.455326 | 0.639800  |
| 7  | 3.945630  | -3.704886 | 0.492611  |
| 1  | 3.648003  | -4.630678 | 0.771061  |
| 7  | 2.281590  | 0.406382  | 0.168888  |
| 7  | -0.169736 | 1.422082  | 0.042473  |
| 7  | 2.132194  | 1.810660  | -0.085356 |
| 7  | -2.423292 | 0.784021  | 0.248309  |
| 7  | -5.865757 | -2.957879 | 0.064013  |
| 1  | -6.664906 | -3.523017 | 0.317753  |
| 6  | 5.219474  | -1.961410 | -0.225010 |
| 6  | 5.225313  | -3.367329 | 0.030131  |
| 6  | 6.358360  | -4.172614 | -0.177078 |
| 1  | 6.341102  | -5.240716 | 0.024345  |
| 6  | 7.519367  | -3.543440 | -0.655621 |
| 1  | 8.417019  | -4.132156 | -0.828020 |
| 6  | 7.537975  | -2.147180 | -0.918346 |
| 1  | 8.452262  | -1.689770 | -1.288945 |
| 6  | 6.399862  | -1.352209 | -0.708379 |
| 1  | 6.438249  | -0.285728 | -0.918093 |

|   |           |           |           |
|---|-----------|-----------|-----------|
| 6 | 3.879985  | -1.472682 | 0.103303  |
| 6 | 3.145115  | -2.583213 | 0.536862  |
| 1 | 2.130347  | -2.622815 | 0.904210  |
| 6 | 3.479720  | -0.098745 | -0.042127 |
| 1 | 4.274430  | 0.563834  | -0.386639 |
| 6 | 0.836390  | 2.316390  | -0.132382 |
| 6 | 0.558971  | 3.690259  | -0.334394 |
| 1 | 1.356089  | 4.408028  | -0.473055 |
| 6 | -0.785697 | 4.086070  | -0.338582 |
| 1 | -1.029811 | 5.134742  | -0.485492 |
| 6 | -1.826572 | 3.160114  | -0.148704 |
| 1 | -2.859414 | 3.477985  | -0.136806 |
| 6 | -1.471065 | 1.809049  | 0.043867  |
| 6 | 3.271899  | 2.675547  | -0.297236 |
| 6 | 3.665407  | 3.012267  | -1.607596 |
| 1 | 3.108975  | 2.614749  | -2.452469 |
| 6 | 4.771660  | 3.859577  | -1.806323 |
| 1 | 5.075389  | 4.123358  | -2.815879 |
| 6 | 5.485265  | 4.360204  | -0.698663 |
| 1 | 6.340743  | 5.012710  | -0.853406 |
| 6 | 5.090934  | 4.014316  | 0.610094  |
| 1 | 5.640063  | 4.399904  | 1.464877  |
| 6 | 3.982466  | 3.171902  | 0.813717  |
| 1 | 3.666268  | 2.898033  | 1.816676  |
| 6 | -3.742457 | 1.146102  | 0.756911  |
| 6 | -3.990292 | 1.052508  | 2.141945  |
| 1 | -3.214903 | 0.680104  | 2.805980  |

|   |           |           |           |
|---|-----------|-----------|-----------|
| 6 | -5.241393 | 1.439928  | 2.652107  |
| 1 | -5.433094 | 1.365464  | 3.719472  |
| 6 | -6.237555 | 1.936513  | 1.786652  |
| 1 | -7.202582 | 2.241011  | 2.184023  |
| 6 | -5.977032 | 2.038120  | 0.406611  |
| 1 | -6.740701 | 2.416841  | -0.267683 |
| 6 | -4.730807 | 1.639584  | -0.111149 |
| 1 | -4.532935 | 1.696735  | -1.176318 |
| 6 | -2.526132 | -1.569091 | 0.697085  |
| 1 | -1.943868 | -2.367955 | 1.155017  |
| 6 | -3.857425 | -1.902658 | 0.203823  |
| 6 | -4.455913 | -1.585177 | -1.087916 |
| 6 | -5.715358 | -2.259666 | -1.140156 |
| 6 | -4.743081 | -2.763733 | 0.851363  |
| 1 | -4.648577 | -3.228841 | 1.822000  |
| 6 | -4.014202 | -0.866630 | -2.223207 |
| 1 | -3.045133 | -0.376432 | -2.223444 |
| 6 | -4.844975 | -0.810188 | -3.351220 |
| 1 | -4.517696 | -0.264720 | -4.233032 |
| 6 | -6.108596 | -1.463062 | -3.370355 |
| 1 | -6.728968 | -1.400027 | -4.261120 |
| 6 | -6.558183 | -2.202326 | -2.265484 |
| 1 | -7.512683 | -2.721947 | -2.288575 |
| 1 | 0.361510  | -1.346628 | -0.824865 |

Table S6. Gibbs free energy of each step.

| step                                                                                |  | hartree | kcal/mol |
|-------------------------------------------------------------------------------------|--|---------|----------|
| 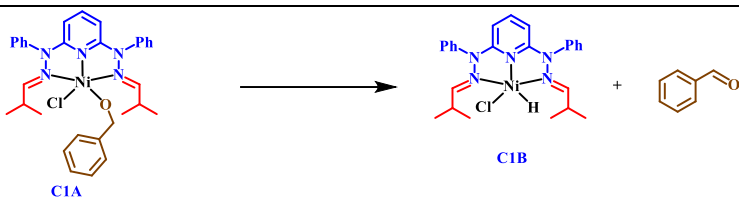   |  | 0.0714  | 44.8     |
|    |  | -0.0674 | -42.3    |
|    |  | 0.0714  | 44.8     |
|  |  | -0.069  | -43.8    |

## References

- 1 O. Singh, N. Tyagi, M. M. Olmstead and K. Ghosh, *Dalt. Trans.*, 2017, **46**, 14186–14191.
- 2 O. V. Dolomanov, L. J. Bourhis, R. J. Gildea, J. A. K. Howard and H. J. Puschmann, *J. Appl. Crystallogr.*, 2009, **42**, 339–341.
- 3 G. M. Sheldrick, *Acta Crystallogr.*, 2014, **A71**, 3–8.
- 4 C. F. Macrae, P. R. Edgington, P. McCabe, E. Pidcock, G. P. Shields, R. Taylor, M. Towler and J. van de Streek, *J. Appl. Crystallogr.*, 2006, **39**, 453–457.
- 5 D. Nair, P. Pavashe, S. Katiyar and I. N. N. Namboothiri, *Tetrahedron Lett.*, 2016, **57**, 3146–3149.

- 6 M. Zora, A. Kivrak and C. Yazici, *J. Org. Chem.*, 2011, **76**, 6726–6742.
- 7 T. Okitsu, K. Sato and A. Wada, *Org. Lett.*, 2010, **12**, 3506–3509.
- 8 B. S. Gerstenberger, M. R. Rauckhorst and J. T. Starr, *Org. Lett.*, 2009, **11**, 2097–2100.
- 9 K. Y. Lee, J. M. Kim and J. N. Kim, *Tetrahedron Lett.*, 2003, **44**, 6737–6740.
- 10 N. Panda and S. Ojha, *J. Organomet. Chem.*, 2018, **861**, 244–251.
- 11 P. Ghorbani, M. Nasr-Esfahani and B. Eftekhari Far, *Russ. J. Org. Chem.*, 2022, **58**, 1812–1820.
- 12 P. Bhat, G. Shridhar, S. Ladage and L. Ravishankar, *J. Chem. Sci.*, 2017, **129**, 1441–1448.
- 13 J. Zhang, X. Li, H. Wei, Y. Li, G. Zhang and Y. Li, *Org. Lett.*, 2021, **23**, 8429–8433.
- 14 V. Singh, B. K. Mishra, D. Kumar and B. Tiwari, *Org. Lett.*, 2023, **25**, 7089–7094.
- 15 M. Linden, S. Hofmann, A. Herman, N. Ehler, R. M. Bär and S. R. Waldvogel, *Angew. Chemie - Int. Ed.*, , DOI:10.1002/anie.202214820.
- 16 F. He, Z. Sun, Y. Xu, J. Yu, W. Li, H. Miao and C. Wu, *Org. Lett.*, 2024, **26**, 4041–4036.
- 17 Y. Wang, C. I. Rivera Vera and Q. Lin, *Org. Lett.*, 2007, **9**, 4155–4158.
- 18 Y. Cheng, D. N. Huh and I. Tonks, *Dalt. Trans.*, , DOI:10.1039/d4dt01412j.
- 19 T. Vahedpour, M. Hamzeh-Mivehroud, S. Hemmati and S. Dastmalchi, *ChemistrySelect*, 2021, **6**, 6483–6506.
- 20 W. Li, H. Li, J. Qiu, Z. Wang, X. Li, Y. M. Pan, C. Hou and H. Li, *J. Org. Chem.*, 2022, **87**, 12477–12481.
- 21 M. Balkenhohl, S. Kölbl, T. Georgiev and E. M. Carreira, *JACS Au*, 2021, **1**, 919–924.
- 22 M. Chen, L. J. Wang, P. X. Ren, X. Y. Hou, Z. Fang, M. N. Han and W. Li, *Org. Lett.*, 2018, **20**, 510–513.
- 23 S. L. Cui, J. Wang and Y. G. Wang, *Org. Lett.*, 2008, **10**, 13–16.
- 24 Y. Ju and R. S. Varma, *J. Org. Chem.*, 2006, **71**, 135–141.
- 25 V. Lellek, C. Y. Chen, W. Yang, J. Liu, X. Ji and R. Faessler, *Synlett*, 2018, **29**, 1071–1075.
- 26 J. P. Waldo, S. Mehta and R. C. Larock, *J. Org. Chem.*, 2008, **73**, 6666–6670.



- 27 Z. Wang, Y. Yang, F. Gao, Q. Luo and L. Fang, *Org. Lett.*, 2018, **20**, 934–937.
- 28 M. N. Yang, D. M. Yan, Q. Q. Zhao, J. R. Chen and W. J. Xiao, *Org. Lett.*, 2017, **19**, 5208–5211.
- 29 R. Labes, J. C. Pastre, R. J. Ingham, C. Battilocchio, H. M. Marçon, M. C. F. C. B. Damião, D. N. Tran and S. V. Ley, *React. Chem. Eng.*, 2023, **9**, 558–565.
- 30 Frisch, M. J.; Trucks, G. W.; Schlegel, H. B.; Scuseria, G. E.; Robb, M. A.; Cheeseman, J. R.; Scalmani, G.; Barone, V.; Mennucci, B.; Petersson, G. A.; et al. Gaussian 09; Gaussian, Inc.: Wallingford, CT, U.S., 2009.
